# Supplementary material
Source: publisher figshare collection journal article supplement (https://gsajournals.figshare.com/articles/dataset/_/12818894)
Supplement: Supplementary file 1 [file 1]

## Sheet: Guide
Tab	Notes
Guide	A guide to the information contained in this Data Set
Experiment Key	Key to experimental sample names and identities. The 228 peptide library is seperated into two pools, "A" and "B," thus there are two data files for each strain/time/pH pairing.
Summary	A summary of the number of unique cleavages detected for each cell type (white and opaque) at each pH (5.5 and 7.4) at each time point (15, 60, and 240 minutes) as well as breakdowns of the numbers of unqiue cleavages shared between cell types or specific to one cell type at each time point.
Compilied Cleavages	A list of all 8mer cleavages detected in at least one experiment as well as a breakdown of the number of times, if any, a given cleavage was detected at each time point. An "X" in the 8mer sequence in Column A indicates no amino acid was present at that position; this represents cases where a cut was near the end of a peptide. An "M" in the 8mer sequence actually represents norleucine, which is u…
Cleavages By Category	A list of all 8mer cleavages detected in various catergories. Includes breakdowns by timepoint, pH, and whether a cleavage was detected in one or both cell types. An "X" in the 8mer sequence indicates no amino acid was present at that position; this represents cases where a cut was near the end of a peptide. An "M" in the 8mer sequence actually represents norleucine, which is used in place of met…
MSPMS Peptide Report	Peptide LC-MS/MS data supporting peptide cleavage site identification for conditioned media from white and opaque SC5314. The following MS/MS-related metrics from Protein Prospector software are provided in a peptide report format: Library Peptide Number (Acc #), m/z, charge (z), Intensity, expected amino acids missing at N-terminal end (Prev AA), peptide sequence detected (DB Peptide), peptide s…

## Sheet: Experiment Key
Sample	Name	Pooled Analysis Set
white pH5.5 15min Pool A	T20170314-04	T20170314-04-05_white_pH55_0015
white pH5.5 15min Pool B	T20170314-05	T20170314-04-05_white_pH55_0015
white pH5.5 60min Pool A	T20170314-06	T20170314-06-07_white_pH55_0060
white pH5.5 60min Pool B	T20170314-07	T20170314-06-07_white_pH55_0060
white pH5.5 240min Pool A	T20170314-08	T20170314-08-09_white_pH55_0240
white pH5.5 240min Pool B	T20170314-09	T20170314-08-09_white_pH55_0240
opaque pH5.5 15min Pool A	T20170314-11	T20170314-11-12_opaque_pH55_0015
opaque pH5.5 15min Pool B	T20170314-12	T20170314-11-12_opaque_pH55_0015
opaque pH5.5 60min Pool A	T20170314-13	T20170314-13-14_opaque_pH55_0060
opaque pH5.5 60min Pool B	T20170314-14	T20170314-13-14_opaque_pH55_0060
opaque pH5.5 240min Pool A	T20170314-15	T20170314-15-16_opaque_pH55_0240
opaque pH5.5 240min Pool B	T20170314-16	T20170314-15-16_opaque_pH55_0240
white pH7.4 15min Pool A	T20170315-03	T20170315-03-04_white_pH74_0015
white pH7.4 15min Pool B	T20170315-04	T20170315-03-04_white_pH74_0015
white pH7.4 60min Pool A	T20170315-05	T20170315-05-06_white_pH74_0060
white pH7.4 60min Pool B	T20170315-06	T20170315-05-06_white_pH74_0060
white pH7.4 240min Pool A	T20170315-07	T20170315-07-08_white_pH74_0240
white pH7.4 240min Pool B	T20170315-08	T20170315-07-08_white_pH74_0240
opaque pH7.4 15min Pool A	T20170315-10	T20170315-10-11_opaque_pH74_0015
opaque pH7.4 15min Pool B	T20170315-11	T20170315-10-11_opaque_pH74_0015
opaque pH7.4 60min Pool A	T20170315-12	T20170315-12-13_opaque_pH74_0060
opaque pH7.4 60min Pool B	T20170315-13	T20170315-12-13_opaque_pH74_0060
opaque pH7.4 240min Pool A	T20170315-14	T20170315-14-15_opaque_pH74_0240
opaque pH7.4 240min Pool B	T20170315-15	T20170315-14-15_opaque_pH74_0240

## Sheet: Summary
Cell Type	pH	Time (minutes)	Unique Cleavages		pH	Time (minutes)	White Cell Only	Common	Opaque Cell Only
White	5.5	15	135		5.5	15	44	91	173
White	5.5	60	214		5.5	60	61	153	224
White	5.5	240	364		5.5	240	110	254	229
White	7.4	15	51		7.4	15	16	35	77
White	7.4	60	76		7.4	60	15	61	107
White	7.4	240	131		7.4	240	24	97	165
Opaque	5.5	15	264
Opaque	5.5	60	377
Opaque	5.5	240	483
Opaque	7.4	15	112
Opaque	7.4	60	168
Opaque	7.4	240	262

## Sheet: Compilied Cleavages
	Counts by Cell Type/pH				Counts By Cell Type/pH/Time Point
	White		Opaque		White						Opaque
8mer	pH 5.5	pH 7.4	pH 5.5	pH 7.4	pH5.5/15min	pH5.5/60min	pH5.5/240min	pH7.4/15min	pH7.4/60min	pH7.4/240min	pH5.5/15min	pH5.5/60min	pH5.5/240min	pH7.4/15min	pH7.4/60min	pH7.4/240min
AEIMQTTQ	0-0-1	ND	0-1-1	ND	0	0	1	0	0	0	0	1	1	0	0	0
AESLMSXX	ND	ND	0-1-1	ND	0	0	0	0	0	0	0	1	1	0	0	0
AFMKWHEG	5-5-3	1-2-7	1-1-1	2-2-4	5	5	3	1	2	7	1	1	1	2	2	4
AFMQVAIT	0-1-1	ND	2-4-5	0-0-1	0	1	1	0	0	0	2	4	5	0	0	1
AFNLYALX	0-0-1	ND	3-4-10	2-2-2	0	0	1	0	0	0	3	4	10	2	2	2
AGILKLMP	11-17-25	0-2-3	ND	0-0-2	11	17	25	0	2	3	0	0	0	0	0	2
AGMSFMMX	0-0-1	ND	1-1-2	ND	0	0	1	0	0	0	1	1	2	0	0	0
AHLFNAMT	0-1-1	ND	1-3-3	ND	0	1	1	0	0	0	1	3	3	0	0	0
AHNAWMXX	ND	ND	0-0-1	ND	0	0	0	0	0	0	0	0	1	0	0	0
AIQAVXXX	ND	ND	ND	0-0-1	0	0	0	0	0	0	0	0	0	0	0	1
AKHYSRQW	0-1-2	ND	ND	ND	0	1	2	0	0	0	0	0	0	0	0	0
ALQHTFXX	ND	ND	0-0-1	ND	0	0	0	0	0	0	0	0	1	0	0	0
AMFRKYPI	1-0-0	ND	ND	ND	1	0	0	0	0	0	0	0	0	0	0	0
AMMKIGEV	0-1-2	ND	1-3-5	0-1-1	0	1	2	0	0	0	1	3	5	0	1	1
ANMQILDP	0-0-1	ND	2-2-2	ND	0	0	1	0	0	0	2	2	2	0	0	0
APSLIAKW	0-0-1	0-0-1	1-3-1	0-1-1	0	0	1	0	0	1	1	3	1	0	1	1
AQNKHAXX	0-0-4	ND	3-4-7	0-0-1	0	0	4	0	0	0	3	4	7	0	0	1
ARINTTFD	0-0-1	ND	1-2-3	0-0-1	0	0	1	0	0	0	1	2	3	0	0	1
ARKYWNVH	10-20-32	0-4-5	22-23-18	1-5-7	10	20	32	0	4	5	22	23	18	1	5	7
ARSAFAEM	ND	ND	2-3-5	ND	0	0	0	0	0	0	2	3	5	0	0	0
ASMRIYIE	1-2-2	ND	5-4-6	1-1-2	1	2	2	0	0	0	5	4	6	1	1	2
ASQKHWEE	1-2-2	0-0-1	ND	0-1-2	1	2	2	0	0	1	0	0	0	0	1	2
ASTSPHMI	0-0-1	ND	ND	ND	0	0	1	0	0	0	0	0	0	0	0	0
ATVYEFGH	ND	ND	0-2-3	ND	0	0	0	0	0	0	0	2	3	0	0	0
AVMFMSKX	2-2-4	0-1-2	5-6-4	2-3-4	2	2	4	0	1	2	5	6	4	2	3	4
AWKFGIFY	ND	ND	0-0-1	ND	0	0	0	0	0	0	0	0	1	0	0	0
AWMTFIVP	ND	ND	1-2-5	ND	0	0	0	0	0	0	1	2	5	0	0	0
DAQRWKNI	0-5-7	ND	24-31-36	2-5-25	0	5	7	0	0	0	24	31	36	2	5	25
DARKYWNV	1-2-6	ND	7-11-8	0-0-3	1	2	6	0	0	0	7	11	8	0	0	3
DEAHNAWM	1-6-11	ND	1-5-15	ND	1	6	11	0	0	0	1	5	15	0	0	0
DFGVWKAI	1-1-2	ND	1-1-2	ND	1	1	2	0	0	0	1	1	2	0	0	0
DFYLGRSV	ND	ND	0-1-4	ND	0	0	0	0	0	0	0	1	4	0	0	0
DGIYRMHV	0-1-2	0-1-1	3-5-1	1-2-4	0	1	2	0	1	1	3	5	1	1	2	4
DHFYTSQI	ND	ND	0-0-3	ND	0	0	0	0	0	0	0	0	3	0	0	0
DHKFEMLT	0-1-3	ND	3-6-10	0-0-1	0	1	3	0	0	0	3	6	10	0	0	1
DIMEMLYX	ND	ND	0-1-1	ND	0	0	0	0	0	0	0	1	1	0	0	0
DINMSVSL	0-1-1	ND	1-2-2	ND	0	1	1	0	0	0	1	2	2	0	0	0
DIQFATAN	ND	ND	1-1-2	0-0-1	0	0	0	0	0	0	1	1	2	0	0	1
DIVANFTG	ND	ND	1-1-1	ND	0	0	0	0	0	0	1	1	1	0	0	0
DKLMNWPQ	ND	ND	0-1-1	ND	0	0	0	0	0	0	0	1	1	0	0	0
DLRWMAYE	ND	ND	0-1-1	0-0-1	0	0	0	0	0	0	0	1	1	0	0	1
DMQKQRYF	0-0-1	ND	3-5-6	0-1-2	0	0	1	0	0	0	3	5	6	0	1	2
DMRQQYLN	0-0-1	ND	ND	ND	0	0	1	0	0	0	0	0	0	0	0	0
DNSKFQPX	ND	ND	1-1-2	ND	0	0	0	0	0	0	1	1	2	0	0	0
DPRYNHTQ	0-0-1	ND	0-2-1	ND	0	0	1	0	0	0	0	2	1	0	0	0
DQIYKLSN	0-1-1	ND	2-3-6	0-1-2	0	1	1	0	0	0	2	3	6	0	1	2
DQRYYVMN	0-3-6	ND	2-2-2	0-1-4	0	3	6	0	0	0	2	2	2	0	1	4
DQVRRMNX	2-9-40	ND	21-43-52	0-3-6	2	9	40	0	0	0	21	43	52	0	3	6
DRGWYLAI	ND	ND	0-1-1	ND	0	0	0	0	0	0	0	1	1	0	0	0
DSIRHQGP	ND	ND	0-0-2	ND	0	0	0	0	0	0	0	0	2	0	0	0
DSQESARD	ND	ND	0-0-1	ND	0	0	0	0	0	0	0	0	1	0	0	0
DTKMHAEN	0-0-1	ND	0-1-1	ND	0	0	1	0	0	0	0	1	1	0	0	0
DWAFRIRS	ND	ND	0-0-1	0-0-1	0	0	0	0	0	0	0	0	1	0	0	1
DWDFNRXX	ND	ND	0-1-1	ND	0	0	0	0	0	0	0	1	1	0	0	0
DYQKERLF	0-0-1	ND	1-1-1	0-0-1	0	0	1	0	0	0	1	1	1	0	0	1
EANYHEQS	ND	ND	0-1-1	ND	0	0	0	0	0	0	0	1	1	0	0	0
EAVMFMSK	1-2-2	ND	2-1-1	0-0-1	1	2	2	0	0	0	2	1	1	0	0	1
EDNYEVWV	ND	ND	0-1-1	ND	0	0	0	0	0	0	0	1	1	0	0	0
EGIKMWQS	9-26-28	0-3-6	22-15-13	4-8-12	9	26	28	0	3	6	22	15	13	4	8	12
EGVKNQDR	ND	ND	0-0-1	ND	0	0	0	0	0	0	0	0	1	0	0	0
EIFRKWHX	0-0-1	ND	ND	ND	0	0	1	0	0	0	0	0	0	0	0	0
EIMQTTQM	0-0-1	ND	0-3-4	ND	0	0	1	0	0	0	0	3	4	0	0	0
EIRDMKNL	ND	ND	ND	0-0-1	0	0	0	0	0	0	0	0	0	0	0	1
EKQRFHPX	0-2-5	ND	9-7-0	4-6-10	0	2	5	0	0	0	9	7	0	4	6	10
ELDTQKWX	ND	ND	0-1-1	ND	0	0	0	0	0	0	0	1	1	0	0	0
EMVHYQIN	ND	ND	0-0-2	ND	0	0	0	0	0	0	0	0	2	0	0	0
EPHSKVNF	ND	ND	ND	0-0-1	0	0	0	0	0	0	0	0	0	0	0	1
EQEYFRMI	0-0-1	ND	0-1-1	ND	0	0	1	0	0	0	0	1	1	0	0	0
EQTHNYRP	1-1-4	ND	2-2-10	0-1-0	1	1	4	0	0	0	2	2	10	0	1	0
ERLFFWAX	0-2-2	ND	2-2-2	0-0-2	0	2	2	0	0	0	2	2	2	0	0	2
ESKYFMQX	ND	ND	ND	1-1-3	0	0	0	0	0	0	0	0	0	1	1	3
ETFDKXXX	ND	ND	ND	1-1-1	0	0	0	0	0	0	0	0	0	1	1	1
ETGHWLMM	0-0-1	ND	ND	ND	0	0	1	0	0	0	0	0	0	0	0	0
ETQWSKIN	0-1-8	ND	ND	ND	0	1	8	0	0	0	0	0	0	0	0	0
ETVYADSS	0-0-1	ND	0-0-1	ND	0	0	1	0	0	0	0	0	1	0	0	0
EVARPLGX	0-0-1	ND	ND	ND	0	0	1	0	0	0	0	0	0	0	0	0
EVNDDVKX	1-0-1	1-1-1	ND	0-1-1	1	0	1	1	1	1	0	0	0	0	1	1
EWELDTQK	ND	ND	0-0-1	ND	0	0	0	0	0	0	0	0	1	0	0	0
EWLHPFKV	0-1-1	ND	0-1-1	ND	0	1	1	0	0	0	0	1	1	0	0	0
EYAMWRLD	ND	ND	ND	1-0-2	0	0	0	0	0	0	0	0	0	1	0	2
EYFRMIRW	0-0-1	ND	0-0-1	ND	0	0	1	0	0	0	0	0	1	0	0	0
EYMQDXXX	0-1-1	1-0-1	1-1-1	ND	0	1	1	1	0	1	1	1	1	0	0	0
EYQFVTYK	1-3-7	ND	1-0-1	0-0-2	1	3	7	0	0	0	1	0	1	0	0	2
EYSWMNLI	ND	ND	1-1-2	ND	0	0	0	0	0	0	1	1	2	0	0	0
FAEMWPDH	0-0-1	ND	0-0-1	ND	0	0	1	0	0	0	0	0	1	0	0	0
FAWDESNG	0-0-1	ND	ND	ND	0	0	1	0	0	0	0	0	0	0	0	0
FDEAHNAW	ND	ND	0-0-1	ND	0	0	0	0	0	0	0	0	1	0	0	0
FEMLTWXX	0-0-1	ND	ND	ND	0	0	1	0	0	0	0	0	0	0	0	0
FGIFYLNG	1-4-8	0-1-3	6-10-2	1-0-3	1	4	8	0	1	3	6	10	2	1	0	3
FGVWKAIL	ND	ND	2-3-2	ND	0	0	0	0	0	0	2	3	2	0	0	0
FHDLNPYM	ND	ND	0-0-1	ND	0	0	0	0	0	0	0	0	1	0	0	0
FHIVKWAS	0-2-1	0-0-1	3-2-3	0-0-1	0	2	1	0	0	1	3	2	3	0	0	1
FHMAIGAR	0-2-2	ND	ND	ND	0	2	2	0	0	0	0	0	0	0	0	0
FHWRIMQG	ND	ND	1-3-2	0-2-1	0	0	0	0	0	0	1	3	2	0	2	1
FIDLRWMA	ND	ND	0-1-1	0-0-1	0	0	0	0	0	0	0	1	1	0	0	1
FIENMTLG	0-0-1	ND	0-1-1	ND	0	0	1	0	0	0	0	1	1	0	0	0
FKHDVQVM	0-0-1	ND	ND	ND	0	0	1	0	0	0	0	0	0	0	0	0
FKHDWYGT	ND	ND	0-0-1	ND	0	0	0	0	0	0	0	0	1	0	0	0
FLVRTWKM	2-3-5	0-0-2	9-11-11	4-2-3	2	3	5	0	0	2	9	11	11	4	2	3
FMAFMKWH	1-1-1	ND	2-3-2	0-2-3	1	1	1	0	0	0	2	3	2	0	2	3
FMAHWVGI	ND	5-6-4	ND	0-0-2	0	0	0	5	6	4	0	0	0	0	0	2
FMIEMHVI	ND	ND	1-2-2	ND	0	0	0	0	0	0	1	2	2	0	0	0
FNEYAMWR	0-0-1	ND	ND	0-0-1	0	0	1	0	0	0	0	0	0	0	0	1
FNIGYKXX	ND	ND	1-1-2	ND	0	0	0	0	0	0	1	1	2	0	0	0
FNLYALXX	0-0-1	ND	1-1-1	1-1-2	0	0	1	0	0	0	1	1	1	1	1	2
FNMYGYDL	0-2-5	ND	5-5-7	0-1-2	0	2	5	0	0	0	5	5	7	0	1	2
FNVKSHPE	1-4-3	0-0-1	ND	0-1-2	1	4	3	0	0	1	0	0	0	0	1	2
FPGQHRIS	ND	ND	0-0-2	ND	0	0	0	0	0	0	0	0	2	0	0	0
FPMHNGRV	2-4-6	ND	ND	0-3-4	2	4	6	0	0	0	0	0	0	0	3	4
FPVRPTEX	ND	ND	0-1-3	ND	0	0	0	0	0	0	0	1	3	0	0	0
FRIHGFDE	ND	ND	0-0-1	ND	0	0	0	0	0	0	0	0	1	0	0	0
FRIRSGTX	1-2-4	1-1-2	ND	8-57-106	1	2	4	1	1	2	0	0	0	8	57	106
FRKWHXXX	ND	0-0-1	ND	1-0-1	0	0	0	0	0	1	0	0	0	1	0	1
FRLQDEQA	0-0-1	ND	ND	ND	0	0	1	0	0	0	0	0	0	0	0	0
FRMIRWAV	0-1-1	ND	ND	ND	0	1	1	0	0	0	0	0	0	0	0	0
FRSRYHGP	2-5-7	ND	1-1-3	1-3-2	2	5	7	0	0	0	1	1	3	1	3	2
FSIHEWEL	0-0-1	ND	0-1-2	ND	0	0	1	0	0	0	0	1	2	0	0	0
FSLSKMNP	ND	ND	0-0-1	ND	0	0	0	0	0	0	0	0	1	0	0	0
FTGHGYHQ	ND	ND	1-1-1	ND	0	0	0	0	0	0	1	1	1	0	0	0
FTNMYXXX	ND	ND	0-1-2	ND	0	0	0	0	0	0	0	1	2	0	0	0
FTQRAGIL	1-1-1	ND	ND	ND	1	1	1	0	0	0	0	0	0	0	0	0
FTYFRAWX	ND	ND	ND	2-2-1	0	0	0	0	0	0	0	0	0	2	2	1
FVTKPNHQ	0-0-1	ND	1-1-7	ND	0	0	1	0	0	0	1	1	7	0	0	0
FVTYKMDX	1-3-3	0-0-1	6-3-3	2-3-2	1	3	3	0	0	1	6	3	3	2	3	2
FWIQNLPX	ND	ND	4-10-17	0-2-2	0	0	0	0	0	0	4	10	17	0	2	2
FYLGRSVP	ND	ND	1-2-2	ND	0	0	0	0	0	0	1	2	2	0	0	0
GALHTSMD	ND	ND	3-4-9	ND	0	0	0	0	0	0	3	4	9	0	0	0
GANHTWVV	ND	ND	0-0-2	ND	0	0	0	0	0	0	0	0	2	0	0	0
GAQYMMGQ	0-1-5	ND	7-11-15	0-2-6	0	1	5	0	0	0	7	11	15	0	2	6
GDIMEMLY	0-3-4	ND	4-5-3	ND	0	3	4	0	0	0	4	5	3	0	0	0
GDIQFATA	0-0-1	ND	2-3-2	ND	0	0	1	0	0	0	2	3	2	0	0	0
GDQRYYVM	0-0-1	ND	ND	0-0-1	0	0	1	0	0	0	0	0	0	0	0	1
GEAVMFMS	0-0-1	ND	ND	ND	0	0	1	0	0	0	0	0	0	0	0	0
GEDRNTFY	ND	ND	0-1-3	ND	0	0	0	0	0	0	0	1	3	0	0	0
GFEYVTAS	0-1-2	ND	0-2-3	ND	0	1	2	0	0	0	0	2	3	0	0	0
GHEMNLQX	1-1-2	ND	3-4-9	ND	1	1	2	0	0	0	3	4	9	0	0	0
GHGYHQXX	ND	ND	1-2-2	0-1-1	0	0	0	0	0	0	1	2	2	0	1	1
GHMYNXXX	0-1-1	ND	1-3-3	1-0-1	0	1	1	0	0	0	1	3	3	1	0	1
GHQSNKPP	ND	ND	0-0-1	ND	0	0	0	0	0	0	0	0	1	0	0	0
GHTFQESM	ND	ND	0-0-1	ND	0	0	0	0	0	0	0	0	1	0	0	0
GHVKLFRF	0-0-3	0-1-2	5-8-6	2-3-4	0	0	3	0	1	2	5	8	6	2	3	4
GHVNSTQX	0-1-2	ND	12-10-7	1-2-2	0	1	2	0	0	0	12	10	7	1	2	2
GHWLMMHF	ND	ND	2-1-1	0-0-1	0	0	0	0	0	0	2	1	1	0	0	1
GIFYLNGD	ND	ND	1-1-1	ND	0	0	0	0	0	0	1	1	1	0	0	0
GIKMWQSM	6-10-12	1-3-7	7-10-12	5-8-7	6	10	12	1	3	7	7	10	12	5	8	7
GILKLMPX	40-78-79	0-4-9	ND	52-115-141	40	78	79	0	4	9	0	0	0	52	115	141
GIQSTYFH	ND	ND	0-1-1	ND	0	0	0	0	0	0	0	1	1	0	0	0
GLTLALWX	ND	ND	0-3-3	0-0-1	0	0	0	0	0	0	0	3	3	0	0	1
GLYFITHX	ND	ND	1-1-1	ND	0	0	0	0	0	0	1	1	1	0	0	0
GLYFRYEI	0-1-1	ND	1-1-1	0-1-1	0	1	1	0	0	0	1	1	1	0	1	1
GMIQYLXX	ND	ND	0-0-1	ND	0	0	0	0	0	0	0	0	1	0	0	0
GMSFMMXX	0-0-1	ND	1-4-6	0-0-1	0	0	1	0	0	0	1	4	6	0	0	1
GPFHIVKW	0-0-1	ND	0-2-4	ND	0	0	1	0	0	0	0	2	4	0	0	0
GPKYEHSS	0-0-1	ND	0-1-9	ND	0	0	1	0	0	0	0	1	9	0	0	0
GPTVNKQL	ND	ND	0-1-1	ND	0	0	0	0	0	0	0	1	1	0	0	0
GRDLHTVT	0-0-1	ND	0-1-1	ND	0	0	1	0	0	0	0	1	1	0	0	0
GRDTMFIX	ND	ND	4-1-2	ND	0	0	0	0	0	0	4	1	2	0	0	0
GRGHEMNL	ND	ND	1-0-1	ND	0	0	0	0	0	0	1	0	1	0	0	0
GRLWIHKX	1-2-5	0-1-1	10-12-11	5-6-8	1	2	5	0	1	1	10	12	11	5	6	8
GRSANAFQ	ND	ND	0-2-1	ND	0	0	0	0	0	0	0	2	1	0	0	0
GRSVPQWH	ND	ND	0-1-1	ND	0	0	0	0	0	0	0	1	1	0	0	0
GSMGANHT	0-0-1	ND	ND	ND	0	0	1	0	0	0	0	0	0	0	0	0
GSQVFSWL	ND	ND	0-0-1	ND	0	0	0	0	0	0	0	0	1	0	0	0
GSRGLYTX	ND	ND	0-0-1	ND	0	0	0	0	0	0	0	0	1	0	0	0
GSWKGVRN	0-0-1	ND	ND	ND	0	0	1	0	0	0	0	0	0	0	0	0
GTIFLPVR	ND	ND	0-0-1	ND	0	0	0	0	0	0	0	0	1	0	0	0
GTQMIEAP	ND	ND	0-0-1	ND	0	0	0	0	0	0	0	0	1	0	0	0
GVKFRXXX	0-1-1	ND	ND	0-0-1	0	1	1	0	0	0	0	0	0	0	0	1
GVRNDFTE	0-0-2	ND	0-1-2	ND	0	0	2	0	0	0	0	1	2	0	0	0
GVWKAILS	0-1-1	ND	1-1-2	0-0-1	0	1	1	0	0	0	1	1	2	0	0	1
GWALQHTF	ND	ND	1-2-3	ND	0	0	0	0	0	0	1	2	3	0	0	0
GWLNTSRQ	ND	ND	1-1-2	ND	0	0	0	0	0	0	1	1	2	0	0	0
GWYLAIQA	0-0-1	ND	0-2-3	0-0-1	0	0	1	0	0	0	0	2	3	0	0	1
GYAQNKHA	0-0-1	ND	1-2-2	ND	0	0	1	0	0	0	1	2	2	0	0	0
GYDLQTAK	0-0-1	ND	0-2-2	ND	0	0	1	0	0	0	0	2	2	0	0	0
HAMFRKYP	2-3-3	1-2-2	2-3-2	2-3-3	2	3	3	1	2	2	2	3	2	2	3	3
HANENYPY	ND	ND	0-0-1	ND	0	0	0	0	0	0	0	0	1	0	0	0
HDINMSVS	ND	ND	0-0-2	ND	0	0	0	0	0	0	0	0	2	0	0	0
HDVLLRPX	0-0-1	ND	0-2-3	ND	0	0	1	0	0	0	0	2	3	0	0	0
HDVQVMLE	0-0-2	ND	12-19-12	ND	0	0	2	0	0	0	12	19	12	0	0	0
HESKYFMQ	ND	0-1-4	ND	5-19-25	0	0	0	0	1	4	0	0	0	5	19	25
HHVNWYKR	1-1-5	0-0-1	1-2-1	ND	1	1	5	0	0	1	1	2	1	0	0	0
HIVKWASX	1-2-3	0-1-2	2-6-8	1-2-2	1	2	3	0	1	2	2	6	8	1	2	2
HKMETNIT	ND	ND	1-1-2	ND	0	0	0	0	0	0	1	1	2	0	0	0
HLFNAMTW	0-1-0	ND	ND	ND	0	1	0	0	0	0	0	0	0	0	0	0
HMIALYWG	1-1-1	ND	3-3-2	1-1-3	1	1	1	0	0	0	3	3	2	1	1	3
HMIWAKPG	0-0-1	ND	0-1-1	ND	0	0	1	0	0	0	0	1	1	0	0	0
HNFHMAIG	1-1-2	ND	ND	ND	1	1	2	0	0	0	0	0	0	0	0	0
HNLFRLQD	0-0-1	ND	1-2-2	0-0-1	0	0	1	0	0	0	1	2	2	0	0	1
HPFKVHXX	0-1-3	ND	0-0-1	ND	0	1	3	0	0	0	0	0	1	0	0	0
HPTFSYMR	ND	ND	0-0-1	ND	0	0	0	0	0	0	0	0	1	0	0	0
HQTHVLLX	0-0-1	ND	0-1-2	ND	0	0	1	0	0	0	0	1	2	0	0	0
HRISDAEL	ND	ND	0-1-1	ND	0	0	0	0	0	0	0	1	1	0	0	0
HRLFTYFR	1-2-1	1-1-1	ND	1-0-1	1	2	1	1	1	1	0	0	0	1	0	1
HRNWRAQH	ND	1-1-1	ND	ND	0	0	0	1	1	1	0	0	0	0	0	0
HRRVYLTS	0-1-1	ND	2-2-2	0-0-1	0	1	1	0	0	0	2	2	2	0	0	1
HTFQESML	ND	ND	0-0-1	ND	0	0	0	0	0	0	0	0	1	0	0	0
HTNDLPLI	ND	ND	1-1-1	ND	0	0	0	0	0	0	1	1	1	0	0	0
HTNKRISQ	1-3-5	0-1-1	2-2-4	0-1-2	1	3	5	0	1	1	2	2	4	0	1	2
HTWVVKAX	ND	ND	0-0-1	ND	0	0	0	0	0	0	0	0	1	0	0	0
HVKLFRFN	2-2-4	2-4-4	4-6-2	5-4-5	2	2	4	2	4	4	4	6	2	5	4	5
HVQLGGAA	0-0-1	ND	0-2-1	ND	0	0	1	0	0	0	0	2	1	0	0	0
HWLMMHFQ	ND	ND	1-0-0	ND	0	0	0	0	0	0	1	0	0	0	0	0
HWRIMQGK	ND	ND	ND	0-0-1	0	0	0	0	0	0	0	0	0	0	0	1
HYGFVTKP	ND	ND	0-0-1	ND	0	0	0	0	0	0	0	0	1	0	0	0
IDLRWMAY	ND	ND	0-0-1	ND	0	0	0	0	0	0	0	0	1	0	0	0
IEHKDQVR	0-2-5	ND	0-0-3	ND	0	2	5	0	0	0	0	0	3	0	0	0
IFRKWHXX	4-8-13	0-1-4	8-11-8	3-4-6	4	8	13	0	1	4	8	11	8	3	4	6
IFVSNAXX	ND	ND	ND	0-1-1	0	0	0	0	0	0	0	0	0	0	1	1
IGPTAAYH	ND	ND	ND	0-0-1	0	0	0	0	0	0	0	0	0	0	0	1
IHGFDEAH	0-1-2	ND	1-1-3	ND	0	1	2	0	0	0	1	1	3	0	0	0
IHGFEYVT	0-0-4	ND	ND	ND	0	0	4	0	0	0	0	0	0	0	0	0
IKILMFYW	1-2-2	1-2-1	5-6-7	1-3-3	1	2	2	1	2	1	5	6	7	1	3	3
IKKESSIX	ND	ND	3-3-4	ND	0	0	0	0	0	0	3	3	4	0	0	0
IKMWQSMX	1-1-1	0-0-1	2-3-2	1-1-4	1	1	1	0	0	1	2	3	2	1	1	4
IKVYDWAF	0-0-1	ND	1-1-1	0-0-1	0	0	1	0	0	0	1	1	1	0	0	1
ILMFYWHE	1-1-0	0-0-1	ND	0-1-0	1	1	0	0	0	1	0	0	0	0	1	0
INDFLVRT	ND	0-0-1	0-2-2	0-2-4	0	0	0	0	0	1	0	2	2	0	2	4
INSYNMWA	0-1-1	ND	ND	ND	0	1	1	0	0	0	0	0	0	0	0	0
IQNLPXXX	ND	ND	1-1-0	0-0-1	0	0	0	0	0	0	1	1	0	0	0	1
IQSTYFHD	ND	ND	0-0-2	ND	0	0	0	0	0	0	0	0	2	0	0	0
IRWAVLXX	0-0-1	ND	ND	ND	0	0	1	0	0	0	0	0	0	0	0	0
ISQWMWEI	ND	1-0-1	ND	ND	0	0	0	1	0	1	0	0	0	0	0	0
ITREWLHP	0-0-1	ND	0-0-4	0-0-1	0	0	1	0	0	0	0	0	4	0	0	1
IVANFTGH	ND	ND	0-0-1	ND	0	0	0	0	0	0	0	0	1	0	0	0
IVKWASXX	ND	ND	1-0-0	ND	0	0	0	0	0	0	1	0	0	0	0	0
IWQKGALH	0-0-1	ND	1-1-3	0-0-1	0	0	1	0	0	0	1	1	3	0	0	1
IWTHNAGM	ND	ND	0-1-1	ND	0	0	0	0	0	0	0	1	1	0	0	0
IYKLSNWF	0-0-1	ND	0-2-4	ND	0	0	1	0	0	0	0	2	4	0	0	0
IYRMHVQL	0-2-5	0-0-1	1-1-2	0-0-3	0	2	5	0	0	1	1	1	2	0	0	3
KERLFFWA	0-1-5	ND	3-4-3	ND	0	1	5	0	0	0	3	4	3	0	0	0
KFTKVMQQ	ND	1-2-1	ND	1-2-1	0	0	0	1	2	1	0	0	0	1	2	1
KIFNTXXX	ND	ND	1-0-1	ND	0	0	0	0	0	0	1	0	1	0	0	0
KILMFYWH	1-1-2	ND	0-1-1	0-1-1	1	1	2	0	0	0	0	1	1	0	1	1
KIMYIRFN	1-1-1	ND	ND	1-1-1	1	1	1	0	0	0	0	0	0	1	1	1
KKTLVMYN	ND	ND	0-0-1	ND	0	0	0	0	0	0	0	0	1	0	0	0
KLSNWFFE	0-0-2	ND	0-2-2	ND	0	0	2	0	0	0	0	2	2	0	0	0
KNQDRMGN	0-0-1	ND	0-0-1	ND	0	0	1	0	0	0	0	0	1	0	0	0
KPTRWQRX	ND	ND	1-2-3	ND	0	0	0	0	0	0	1	2	3	0	0	0
KQDDLMSE	ND	ND	1-1-1	ND	0	0	0	0	0	0	1	1	1	0	0	0
KRISQWMW	1-3-5	0-0-1	2-1-2	ND	1	3	5	0	0	1	2	1	2	0	0	0
KTVFGSDL	ND	ND	0-0-2	ND	0	0	0	0	0	0	0	0	2	0	0	0
KVFMPYYG	ND	0-0-1	ND	ND	0	0	0	0	0	1	0	0	0	0	0	0
KVMYWHFX	2-3-3	1-2-3	3-2-4	1-2-2	2	3	3	1	2	3	3	2	4	1	2	2
KVNFQQHI	0-1-2	ND	1-1-2	0-0-1	0	1	2	0	0	0	1	1	2	0	0	1
KVYDWAFR	ND	ND	1-1-1	0-0-1	0	0	0	0	0	0	1	1	1	0	0	1
KYIWYVQT	0-1-1	0-0-1	0-1-1	ND	0	1	1	0	0	1	0	1	1	0	0	0
KYVLGWLN	0-0-1	ND	1-1-1	ND	0	0	1	0	0	0	1	1	1	0	0	0
LAGKRRDW	7-7-6	3-4-6	14-8-9	13-6-10	7	7	6	3	4	6	14	8	9	13	6	10
LAIQAVXX	0-0-1	ND	3-2-4	0-1-1	0	0	1	0	0	0	3	2	4	0	1	1
LAMYSFTP	2-2-3	1-1-2	4-4-5	3-3-3	2	2	3	1	1	2	4	4	5	3	3	3
LDHFYTSQ	0-1-1	ND	0-1-2	ND	0	1	1	0	0	0	0	1	2	0	0	0
LDKLMNWP	0-0-1	ND	0-1-1	ND	0	0	1	0	0	0	0	1	1	0	0	0
LEMHEPLY	ND	ND	0-0-1	ND	0	0	0	0	0	0	0	0	1	0	0	0
LFFWAXXX	0-1-0	0-0-1	ND	ND	0	1	0	0	0	1	0	0	0	0	0	0
LFNAMTWP	1-2-3	ND	ND	ND	1	2	3	0	0	0	0	0	0	0	0	0
LFTYFRAW	3-3-2	3-4-5	ND	4-5-7	3	3	2	3	4	5	0	0	0	4	5	7
LIAKWVGF	10-44-16	2-5-10	14-16-13	2-6-14	10	44	16	2	5	10	14	16	13	2	6	14
LISVMRXX	0-1-3	ND	1-2-4	ND	0	1	3	0	0	0	1	2	4	0	0	0
LKINSYNM	0-2-2	0-0-1	ND	0-0-2	0	2	2	0	0	1	0	0	0	0	0	2
LLTMNEIF	ND	ND	3-3-3	0-1-1	0	0	0	0	0	0	3	3	3	0	1	1
LMFYWHEF	ND	ND	ND	0-1-0	0	0	0	0	0	0	0	0	0	0	1	0
LMMHFQED	2-3-4	0-0-1	3-5-5	1-1-1	2	3	4	0	0	1	3	5	5	1	1	1
LMSEQFTN	ND	ND	0-1-2	ND	0	0	0	0	0	0	0	1	2	0	0	0
LNGEAVMF	ND	ND	0-0-1	ND	0	0	0	0	0	0	0	0	1	0	0	0
LNHYHRKX	2-2-2	0-0-1	4-5-7	2-6-10	2	2	2	0	0	1	4	5	7	2	6	10
LNIHFKFD	2-2-2	ND	3-2-3	0-1-2	2	2	2	0	0	0	3	2	3	0	1	2
LNMKWTRV	9-9-12	2-5-7	10-6-3	6-7-8	9	9	12	2	5	7	10	6	3	6	7	8
LNPYMXXX	0-0-1	ND	0-0-1	0-0-1	0	0	1	0	0	0	0	0	1	0	0	1
LPAEIMQT	ND	ND	0-0-2	ND	0	0	0	0	0	0	0	0	2	0	0	0
LPEIWXXX	ND	ND	0-0-1	ND	0	0	0	0	0	0	0	0	1	0	0	0
LPSRNGWH	ND	ND	0-1-2	ND	0	0	0	0	0	0	0	1	2	0	0	0
LQDEQATV	0-0-1	ND	ND	ND	0	0	1	0	0	0	0	0	0	0	0	0
LQGFWXXX	ND	ND	0-0-1	ND	0	0	0	0	0	0	0	0	1	0	0	0
LQVHMRYI	0-0-15	ND	0-1-15	ND	0	0	15	0	0	0	0	1	15	0	0	0
LRWMAYEE	ND	ND	2-2-1	ND	0	0	0	0	0	0	2	2	1	0	0	0
LSNWFFEQ	1-1-2	ND	2-3-5	0-1-2	1	1	2	0	0	0	2	3	5	0	1	2
LTEHRSDS	ND	ND	0-0-1	ND	0	0	0	0	0	0	0	0	1	0	0	0
LVATVYEF	ND	ND	0-2-1	ND	0	0	0	0	0	0	0	2	1	0	0	0
LVDHIGPT	ND	ND	0-1-2	ND	0	0	0	0	0	0	0	1	2	0	0	0
LVHRETQW	1-3-2	ND	ND	ND	1	3	2	0	0	0	0	0	0	0	0	0
LVMYNEWN	ND	0-0-1	ND	ND	0	0	0	0	0	1	0	0	0	0	0	0
LVRTWKMP	0-0-1	ND	1-4-2	0-1-2	0	0	1	0	0	0	1	4	2	0	1	2
LWERTIVN	0-0-1	ND	17-8-10	ND	0	0	1	0	0	0	17	8	10	0	0	0
LYFRYEIP	ND	ND	2-1-1	ND	0	0	0	0	0	0	2	1	1	0	0	0
LYRMIRQE	3-2-1	1-1-2	1-1-1	1-1-1	3	2	1	1	1	2	1	1	1	1	1	1
MAIGARSD	0-2-2	ND	ND	ND	0	2	2	0	0	0	0	0	0	0	0	0
MANFLRGP	2-2-3	0-1-1	3-4-4	3-2-3	2	2	3	0	1	1	3	4	4	3	2	3
MDQIYKLS	ND	ND	1-0-0	ND	0	0	0	0	0	0	1	0	0	0	0	0
MENYMVLT	0-0-1	ND	ND	1-1-1	0	0	1	0	0	0	0	0	0	1	1	1
MFLREKQY	0-0-1	ND	ND	ND	0	0	1	0	0	0	0	0	0	0	0	0
MFRKYPIM	ND	4-6-3	ND	11-1-1	0	0	0	4	6	3	0	0	0	11	1	1
MFVKISTT	3-3-2	0-2-2	2-1-2	1-1-2	3	3	2	0	2	2	2	1	2	1	1	2
MGMYASQK	ND	ND	1-1-1	ND	0	0	0	0	0	0	1	1	1	0	0	0
MGPFHIVK	ND	ND	0-0-1	ND	0	0	0	0	0	0	0	0	1	0	0	0
MGSRGLYT	0-0-1	ND	1-2-3	0-0-1	0	0	1	0	0	0	1	2	3	0	0	1
MHAENIAQ	0-1-2	ND	2-5-5	ND	0	1	2	0	0	0	2	5	5	0	0	0
MHRNWRAQ	2-0-1	1-2-2	ND	ND	2	0	1	1	2	2	0	0	0	0	0	0
MHVQLGGA	ND	ND	2-0-0	ND	0	0	0	0	0	0	2	0	0	0	0	0
MIALYWGR	0-1-4	ND	2-0-2	0-1-1	0	1	4	0	0	0	2	0	2	0	1	1
MIEMHVIX	0-0-1	ND	2-2-0	1-1-2	0	0	1	0	0	0	2	2	0	1	1	2
MIGHVKLF	0-0-2	ND	ND	ND	0	0	2	0	0	0	0	0	0	0	0	0
MIQYLXXX	ND	ND	ND	0-0-1	0	0	0	0	0	0	0	0	0	0	0	1
MIVQHRLF	ND	ND	ND	0-0-1	0	0	0	0	0	0	0	0	0	0	0	1
MKELGRSA	ND	ND	0-0-1	ND	0	0	0	0	0	0	0	0	1	0	0	0
MKIGEVAR	0-0-1	ND	ND	ND	0	0	1	0	0	0	0	0	0	0	0	0
MKNLAPAN	0-0-2	ND	ND	ND	0	0	2	0	0	0	0	0	0	0	0	0
MKTDWWAY	0-0-2	ND	ND	ND	0	0	2	0	0	0	0	0	0	0	0	0
MKWTRVLF	1-1-1	1-1-1	ND	0-1-1	1	1	1	1	1	1	0	0	0	0	1	1
MLDKLMNW	ND	ND	0-1-1	ND	0	0	0	0	0	0	0	1	1	0	0	0
MLKDDMGX	0-0-1	ND	0-1-1	0-1-0	0	0	1	0	0	0	0	1	1	0	1	0
MLKHWFAW	0-2-9	ND	4-6-12	ND	0	2	9	0	0	0	4	6	12	0	0	0
MQGHVNST	1-1-2	ND	ND	ND	1	1	2	0	0	0	0	0	0	0	0	0
MQGKKAPX	ND	0-0-1	ND	ND	0	0	0	0	0	1	0	0	0	0	0	0
MQTTQMXX	ND	ND	0-0-1	ND	0	0	0	0	0	0	0	0	1	0	0	0
MRIYIEPE	ND	ND	ND	0-0-1	0	0	0	0	0	0	0	0	0	0	0	1
MRQQYLNT	1-3-11	0-0-1	9-14-13	0-2-7	1	3	11	0	0	1	9	14	13	0	2	7
MSFMMXXX	ND	ND	ND	0-0-1	0	0	0	0	0	0	0	0	0	0	0	1
MSTHLAGK	ND	ND	0-1-2	ND	0	0	0	0	0	0	0	1	2	0	0	0
MVHYQINQ	0-0-1	ND	2-1-2	0-0-1	0	0	1	0	0	0	2	1	2	0	0	1
MVIKKESS	1-1-2	ND	1-5-9	0-0-2	1	1	2	0	0	0	1	5	9	0	0	2
MWSLYRMI	ND	4-8-6	6-2-0	9-6-10	0	0	0	4	8	6	6	2	0	9	6	10
MYFKYIWY	0-1-1	ND	0-2-1	ND	0	1	1	0	0	0	0	2	1	0	0	0
MYIRFNPF	ND	ND	ND	3-1-0	0	0	0	0	0	0	0	0	0	3	1	0
MYWHYLMX	ND	ND	0-1-1	0-0-1	0	0	0	0	0	0	0	1	1	0	0	1
NAGMSFMM	0-0-1	ND	0-0-1	ND	0	0	1	0	0	0	0	0	1	0	0	0
NAKHYSRQ	0-1-1	ND	2-3-1	ND	0	1	1	0	0	0	2	3	1	0	0	0
NDFLVRTW	0-0-2	ND	ND	ND	0	0	2	0	0	0	0	0	0	0	0	0
NDVDGGXX	0-0-1	0-0-1	ND	0-0-1	0	0	1	0	0	1	0	0	0	0	0	1
NEAHMKTD	1-1-2	ND	2-4-4	ND	1	1	2	0	0	0	2	4	4	0	0	0
NEIFRKWH	0-1-1	ND	ND	ND	0	1	1	0	0	0	0	0	0	0	0	0
NFMAFMKW	3-3-2	1-1-2	7-6-7	5-2-3	3	3	2	1	1	2	7	6	7	5	2	3
NGMYWHYL	4-11-3	0-2-5	2-3-4	0-1-3	4	11	3	0	2	5	2	3	4	0	1	3
NGQMIRWH	0-1-1	ND	1-2-2	0-1-1	0	1	1	0	0	0	1	2	2	0	1	1
NHQIWDXX	ND	ND	4-7-18	ND	0	0	0	0	0	0	4	7	18	0	0	0
NHQLAWGE	ND	ND	0-0-1	ND	0	0	0	0	0	0	0	0	1	0	0	0
NHTQQFPX	ND	ND	1-1-1	ND	0	0	0	0	0	0	1	1	1	0	0	0
NHTWVVKA	1-1-1	ND	2-4-4	1-1-1	1	1	1	0	0	0	2	4	4	1	1	1
NITREWLH	0-0-2	ND	0-0-2	ND	0	0	2	0	0	0	0	0	2	0	0	0
NKVGQAXX	ND	ND	0-1-0	ND	0	0	0	0	0	0	0	1	0	0	0	0
NLYALXXX	ND	ND	ND	1-1-1	0	0	0	0	0	0	0	0	0	1	1	1
NMEFKHDW	0-0-1	ND	0-1-1	ND	0	0	1	0	0	0	0	1	1	0	0	0
NMLKDDMG	0-0-1	ND	1-3-4	ND	0	0	1	0	0	0	1	3	4	0	0	0
NPIKILMF	0-1-0	ND	1-1-0	0-1-1	0	1	0	0	0	0	1	1	0	0	1	1
NQIIWFDY	0-0-1	ND	0-2-2	ND	0	0	1	0	0	0	0	2	2	0	0	0
NQIRYRWA	14-22-30	0-2-4	9-26-33	1-2-7	14	22	30	0	2	4	9	26	33	1	2	7
NQMRGFXX	ND	ND	0-1-2	ND	0	0	0	0	0	0	0	1	2	0	0	0
NTSRQAEX	0-1-3	ND	2-4-5	ND	0	1	3	0	0	0	2	4	5	0	0	0
NYNQMRGF	ND	ND	0-1-1	ND	0	0	0	0	0	0	0	1	1	0	0	0
PAFMHXXX	ND	ND	0-1-2	0-0-3	0	0	0	0	0	0	0	1	2	0	0	3
PDFYLGRS	ND	ND	0-1-0	ND	0	0	0	0	0	0	0	1	0	0	0	0
PDNFKREX	ND	ND	1-1-1	0-0-1	0	0	0	0	0	0	1	1	1	0	0	1
PFKHDVQV	0-0-1	ND	ND	ND	0	0	1	0	0	0	0	0	0	0	0	0
PFWMLXXX	ND	ND	ND	0-0-1	0	0	0	0	0	0	0	0	0	0	0	1
PGIHDVLL	0-0-1	ND	1-1-1	ND	0	0	1	0	0	0	1	1	1	0	0	0
PGMRHSAV	ND	ND	0-0-2	ND	0	0	0	0	0	0	0	0	2	0	0	0
PHLWERTI	0-1-1	ND	1-0-1	ND	0	1	1	0	0	0	1	0	1	0	0	0
PHSKVNFQ	0-0-1	ND	0-1-1	0-0-1	0	0	1	0	0	0	0	1	1	0	0	1
PIDWHHXX	ND	ND	0-0-1	ND	0	0	0	0	0	0	0	0	1	0	0	0
PKAPESXX	ND	ND	ND	0-0-1	0	0	0	0	0	0	0	0	0	0	0	1
PKVMYWHF	0-0-1	ND	1-1-1	ND	0	0	1	0	0	0	1	1	1	0	0	0
PLEKMVXX	0-0-1	ND	0-1-2	ND	0	0	1	0	0	0	0	1	2	0	0	0
PLETVYAD	ND	ND	0-0-1	ND	0	0	0	0	0	0	0	0	1	0	0	0
PLISVMRX	ND	ND	0-2-2	ND	0	0	0	0	0	0	0	2	2	0	0	0
PLKFTKVM	ND	ND	0-1-1	ND	0	0	0	0	0	0	0	1	1	0	0	0
PMGMYASQ	0-0-1	ND	1-1-2	0-0-1	0	0	1	0	0	0	1	1	2	0	0	1
PMLKHWFA	ND	ND	0-0-1	ND	0	0	0	0	0	0	0	0	1	0	0	0
PPNRDEGW	1-1-1	ND	ND	ND	1	1	1	0	0	0	0	0	0	0	0	0
PQLWWXXX	ND	ND	ND	0-0-1	0	0	0	0	0	0	0	0	0	0	0	1
PQVDLYDK	0-0-1	ND	0-1-6	ND	0	0	1	0	0	0	0	1	6	0	0	0
PRGHMYNX	ND	ND	0-2-6	ND	0	0	0	0	0	0	0	2	6	0	0	0
PSMNKVGQ	0-0-1	ND	0-2-2	ND	0	0	1	0	0	0	0	2	2	0	0	0
PTFSYMRW	ND	ND	0-0-1	ND	0	0	0	0	0	0	0	0	1	0	0	0
PTRLHSXX	ND	ND	0-1-1	ND	0	0	0	0	0	0	0	1	1	0	0	0
PTRWQRXX	ND	ND	0-1-2	ND	0	0	0	0	0	0	0	1	2	0	0	0
PTVNKQLR	ND	ND	1-2-1	0-1-1	0	0	0	0	0	0	1	2	1	0	1	1
PVEYMQDX	ND	ND	1-1-4	ND	0	0	0	0	0	0	1	1	4	0	0	0
PVIWTHNA	ND	ND	0-0-1	ND	0	0	0	0	0	0	0	0	1	0	0	0
PVMEFATG	2-5-7	ND	6-7-7	0-0-1	2	5	7	0	0	0	6	7	7	0	0	1
PVSARINT	0-0-1	ND	ND	ND	0	0	1	0	0	0	0	0	0	0	0	0
PVSQVLHX	1-1-3	0-0-1	3-9-12	0-1-1	1	1	3	0	0	1	3	9	12	0	1	1
PWNMLKDD	ND	ND	0-1-1	ND	0	0	0	0	0	0	0	1	1	0	0	0
PYQDAXXX	ND	1-0-1	0-1-1	0-1-1	0	0	0	1	0	1	0	1	1	0	1	1
QEHYNAPD	ND	ND	0-1-0	ND	0	0	0	0	0	0	0	1	0	0	0	0
QEYFRMIR	0-0-1	ND	ND	ND	0	0	1	0	0	0	0	0	0	0	0	0
QFVTYKMD	1-2-3	ND	1-1-0	ND	1	2	3	0	0	0	1	1	0	0	0	0
QGPFWMLX	ND	ND	0-0-1	ND	0	0	0	0	0	0	0	0	1	0	0	0
QHRLFTYF	1-5-4	ND	5-5-3	1-0-1	1	5	4	0	0	0	5	5	3	1	0	1
QKERLFFW	ND	ND	0-0-1	ND	0	0	0	0	0	0	0	0	1	0	0	0
QKGALHTS	0-0-1	ND	0-1-2	ND	0	0	1	0	0	0	0	1	2	0	0	0
QKQRYFDW	ND	ND	1-5-4	ND	0	0	0	0	0	0	1	5	4	0	0	0
QLIEYLDX	ND	ND	0-1-1	ND	0	0	0	0	0	0	0	1	1	0	0	0
QMIEAPLH	ND	ND	0-0-1	ND	0	0	0	0	0	0	0	0	1	0	0	0
QMIKSKED	0-0-1	ND	2-4-4	1-1-1	0	0	1	0	0	0	2	4	4	1	1	1
QMIRWHFS	2-4-2	0-0-3	1-2-6	2-2-2	2	4	2	0	0	3	1	2	6	2	2	2
QMKKTLVM	ND	0-0-1	1-1-1	ND	0	0	0	0	0	1	1	1	1	0	0	0
QNALDASH	ND	ND	0-0-2	ND	0	0	0	0	0	0	0	0	2	0	0	0
QNEAHMKT	ND	ND	0-0-1	ND	0	0	0	0	0	0	0	0	1	0	0	0
QNKHAXXX	ND	ND	ND	1-1-2	0	0	0	0	0	0	0	0	0	1	1	2
QNSDPKAG	1-1-1	ND	ND	ND	1	1	1	0	0	0	0	0	0	0	0	0
QPVSARIN	ND	ND	0-0-1	0-0-1	0	0	0	0	0	0	0	0	1	0	0	1
QRYYVMNE	ND	ND	0-2-1	ND	0	0	0	0	0	0	0	2	1	0	0	0
QTERHVYF	1-1-1	ND	2-3-3	ND	1	1	1	0	0	0	2	3	3	0	0	0
QTHNYRPD	ND	ND	ND	0-0-1	0	0	0	0	0	0	0	0	0	0	0	1
QTRDQNKV	0-0-1	ND	ND	ND	0	0	1	0	0	0	0	0	0	0	0	0
QVDLYDKS	ND	ND	0-1-2	ND	0	0	0	0	0	0	0	1	2	0	0	0
QVKHMEXX	ND	ND	0-0-1	ND	0	0	0	0	0	0	0	0	1	0	0	0
QWMWEIRX	ND	ND	0-0-1	ND	0	0	0	0	0	0	0	0	1	0	0	0
QWSKINGX	1-35-51	ND	ND	2-3-50	1	35	51	0	0	0	0	0	0	2	3	50
RDMKNLAP	0-0-1	ND	ND	1-1-1	0	0	1	0	0	0	0	0	0	1	1	1
RETQWSKI	ND	ND	0-0-1	ND	0	0	0	0	0	0	0	0	1	0	0	0
RFIENMTL	ND	ND	0-1-2	ND	0	0	0	0	0	0	0	1	2	0	0	0
RFMAHWVG	ND	0-1-1	ND	ND	0	0	0	0	1	1	0	0	0	0	0	0
RGLYFITH	1-7-3	ND	2-3-3	0-1-2	1	7	3	0	0	0	2	3	3	0	1	2
RHVYFAXX	0-3-4	ND	3-4-3	0-1-2	0	3	4	0	0	0	3	4	3	0	1	2
RISQWMWE	2-3-10	ND	3-4-4	0-0-1	2	3	10	0	0	0	3	4	4	0	0	1
RMENYMVL	1-1-1	ND	ND	ND	1	1	1	0	0	0	0	0	0	0	0	0
RMGKNFXX	0-0-1	ND	ND	ND	0	0	1	0	0	0	0	0	0	0	0	0
RMIRWAVL	6-7-19	1-4-5	6-5-2	3-7-9	6	7	19	1	4	5	6	5	2	3	7	9
RNGWHHNP	ND	ND	0-1-2	ND	0	0	0	0	0	0	0	1	2	0	0	0
RNMEFKHD	0-1-2	ND	1-3-3	ND	0	1	2	0	0	0	1	3	3	0	0	0
RNTFYXXX	ND	ND	0-1-1	ND	0	0	0	0	0	0	0	1	1	0	0	0
RPVMEFAT	0-0-1	ND	1-1-1	ND	0	0	1	0	0	0	1	1	1	0	0	0
RQQYLNTG	0-0-1	ND	0-1-0	ND	0	0	1	0	0	0	0	1	0	0	0	0
RRVYLTSP	9-22-19	0-3-4	11-12-14	0-1-2	9	22	19	0	3	4	11	12	14	0	1	2
RSAFAEMW	ND	ND	0-0-1	ND	0	0	0	0	0	0	0	0	1	0	0	0
RSPLEKMV	ND	ND	0-1-1	ND	0	0	0	0	0	0	0	1	1	0	0	0
RTQKEYQF	1-1-2	0-0-1	ND	ND	1	1	2	0	0	1	0	0	0	0	0	0
RVGKWSYR	3-7-8	0-2-2	9-7-10	2-3-7	3	7	8	0	2	2	9	7	10	2	3	7
RVIFFRLN	2-8-13	3-5-5	ND	16-6-5	2	8	13	3	5	5	0	0	0	16	6	5
RWLIFVSN	0-0-1	ND	ND	ND	0	0	1	0	0	0	0	0	0	0	0	0
RWMAYEEP	ND	ND	1-2-2	ND	0	0	0	0	0	0	1	2	2	0	0	0
SEQFTNMY	ND	ND	0-0-1	ND	0	0	0	0	0	0	0	0	1	0	0	0
SHQTHVLL	ND	ND	0-1-1	ND	0	0	0	0	0	0	0	1	1	0	0	0
SHTNDLPL	0-1-1	0-0-1	0-1-1	ND	0	1	1	0	0	1	0	1	1	0	0	0
SKMNPVSQ	0-0-1	ND	1-1-2	ND	0	0	1	0	0	0	1	1	2	0	0	0
SKVNFQQH	ND	ND	1-1-4	ND	0	0	0	0	0	0	1	1	4	0	0	0
SLIAKWVG	0-0-1	ND	1-2-3	0-0-1	0	0	1	0	0	0	1	2	3	0	0	1
SLSKMNPV	ND	ND	0-1-1	ND	0	0	0	0	0	0	0	1	1	0	0	0
SMNKVGQA	ND	ND	0-3-2	ND	0	0	0	0	0	0	0	3	2	0	0	0
SMQFNVKS	0-2-3	0-0-1	5-5-6	1-1-3	0	2	3	0	0	1	5	5	6	1	1	3
SPLEKMVX	0-0-1	ND	4-14-32	ND	0	0	1	0	0	0	4	14	32	0	0	0
SQEHYNAP	0-0-2	ND	0-0-2	ND	0	0	2	0	0	0	0	0	2	0	0	0
SQVKHMEX	1-1-1	ND	ND	ND	1	1	1	0	0	0	0	0	0	0	0	0
SQVLHXXX	ND	ND	ND	0-0-1	0	0	0	0	0	0	0	0	0	0	0	1
SRGLYFIT	0-1-4	ND	5-8-10	0-0-2	0	1	4	0	0	0	5	8	10	0	0	2
SRGLYTXX	0-0-1	ND	0-1-9	ND	0	0	1	0	0	0	0	1	9	0	0	0
SRQAEXXX	ND	ND	0-0-1	ND	0	0	0	0	0	0	0	0	1	0	0	0
SRQWWEMF	ND	ND	4-8-1	0-0-1	0	0	0	0	0	0	4	8	1	0	0	1
SSADIQGX	ND	ND	0-0-1	0-0-1	0	0	0	0	0	0	0	0	1	0	0	1
SYEKQRFH	1-2-7	ND	3-2-4	0-2-2	1	2	7	0	0	0	3	2	4	0	2	2
TAFRSRYH	ND	ND	3-2-2	ND	0	0	0	0	0	0	3	2	2	0	0	0
TERHVYFA	0-5-13	ND	2-4-4	ND	0	5	13	0	0	0	2	4	4	0	0	0
TFQESMLD	ND	ND	0-0-1	ND	0	0	0	0	0	0	0	0	1	0	0	0
TGHWLMMH	ND	ND	0-0-1	ND	0	0	0	0	0	0	0	0	1	0	0	0
THVLLXXX	0-0-1	ND	0-1-1	0-0-1	0	0	1	0	0	0	0	1	1	0	0	1
TKLDELQF	ND	ND	0-0-1	ND	0	0	0	0	0	0	0	0	1	0	0	0
TKMHAENI	ND	ND	1-1-1	0-0-1	0	0	0	0	0	0	1	1	1	0	0	1
TLKGEHXX	ND	ND	0-1-2	ND	0	0	0	0	0	0	0	1	2	0	0	0
TMANFLRG	ND	ND	1-1-1	ND	0	0	0	0	0	0	1	1	1	0	0	0
TNIRASVP	1-3-10	0-1-3	20-19-17	3-2-10	1	3	10	0	1	3	20	19	17	3	2	10
TNKRISQW	0-1-1	ND	2-2-3	ND	0	1	1	0	0	0	2	2	3	0	0	0
TNMYQAGD	0-0-1	ND	0-2-4	ND	0	0	1	0	0	0	0	2	4	0	0	0
TQRAGILK	0-0-1	ND	ND	ND	0	0	1	0	0	0	0	0	0	0	0	0
TRDQNKVG	ND	ND	0-0-1	ND	0	0	0	0	0	0	0	0	1	0	0	0
TREWLHPF	ND	ND	0-1-4	ND	0	0	0	0	0	0	0	1	4	0	0	0
TRLNGEAV	ND	0-0-1	ND	ND	0	0	0	0	0	1	0	0	0	0	0	0
TRWLIFVS	0-1-1	ND	2-4-3	0-1-2	0	1	1	0	0	0	2	4	3	0	1	2
TSIKVFMP	2-3-5	1-1-2	3-3-5	2-3-2	2	3	5	1	1	2	3	3	5	2	3	2
TSNLQADW	0-0-1	ND	0-1-2	ND	0	0	1	0	0	0	0	1	2	0	0	0
TVNKQLRX	4-10-56	ND	ND	1-1-4	4	10	56	0	0	0	0	0	0	1	1	4
TVTAESLM	ND	ND	0-1-1	ND	0	0	0	0	0	0	0	1	1	0	0	0
TWMKIFNT	7-7-6	12-15-16	5-2-0	11-11-6	7	7	6	12	15	16	5	2	0	11	11	6
TYDFWIQN	0-1-2	ND	1-1-1	ND	0	1	2	0	0	0	1	1	1	0	0	0
TYFRAWXX	ND	ND	ND	1-0-0	0	0	0	0	0	0	0	0	0	1	0	0
TYGRLWIH	0-0-1	ND	3-3-2	1-1-2	0	0	1	0	0	0	3	3	2	1	1	2
TYKMDXXX	ND	2-1-2	ND	3-3-2	0	0	0	2	1	2	0	0	0	3	3	2
VASHRMGK	0-0-2	ND	12-10-8	ND	0	0	2	0	0	0	12	10	8	0	0	0
VDLYDKSX	0-1-1	ND	1-3-5	ND	0	1	1	0	0	0	1	3	5	0	0	0
VDSHAKRN	0-0-2	ND	3-4-4	0-0-1	0	0	2	0	0	0	3	4	4	0	0	1
VFIDLRWM	ND	ND	ND	2-2-2	0	0	0	0	0	0	0	0	0	2	2	2
VFILWRTE	0-1-12	ND	16-17-27	4-5-8	0	1	12	0	0	0	16	17	27	4	5	8
VGMYWTLN	13-23-25	0-1-3	16-24-18	0-7-10	13	23	25	0	1	3	16	24	18	0	7	10
VHMRYINV	2-1-1	1-2-3	6-3-1	6-6-4	2	1	1	1	2	3	6	3	1	6	6	4
VHSDAYVT	0-1-1	ND	ND	ND	0	1	1	0	0	0	0	0	0	0	0	0
VIKKESSI	0-0-1	ND	0-2-2	ND	0	0	1	0	0	0	0	2	2	0	0	0
VKLFRFNW	7-8-9	3-5-6	ND	2-1-1	7	8	9	3	5	6	0	0	0	2	1	1
VKNQDRMG	ND	ND	0-0-2	ND	0	0	0	0	0	0	0	0	2	0	0	0
VKWASXXX	ND	ND	1-3-2	ND	0	0	0	0	0	0	1	3	2	0	0	0
VMFMSKXX	ND	ND	ND	0-0-1	0	0	0	0	0	0	0	0	0	0	0	1
VNIFEIHG	ND	ND	0-1-1	ND	0	0	0	0	0	0	0	1	1	0	0	0
VNKQLRXX	0-1-2	ND	0-1-1	ND	0	1	2	0	0	0	0	1	1	0	0	0
VNWYKRAP	0-0-2	ND	0-1-1	ND	0	0	2	0	0	0	0	1	1	0	0	0
VPQLWWXX	0-0-1	ND	ND	ND	0	0	1	0	0	0	0	0	0	0	0	0
VPQWHEXX	ND	ND	0-0-1	ND	0	0	0	0	0	0	0	0	1	0	0	0
VRRMNXXX	ND	ND	1-1-1	ND	0	0	0	0	0	0	1	1	1	0	0	0
VVQDKHEI	ND	ND	ND	0-0-1	0	0	0	0	0	0	0	0	0	0	0	1
VWKAILSQ	ND	ND	0-1-1	ND	0	0	0	0	0	0	0	1	1	0	0	0
VYADSSEW	0-0-1	ND	1-1-2	1-0-1	0	0	1	0	0	0	1	1	2	1	0	1
WAFRIRSG	1-3-12	1-1-2	2-3-5	0-0-2	1	3	12	1	1	2	2	3	5	0	0	2
WAFRSRYH	2-7-15	0-1-1	ND	1-1-2	2	7	15	0	1	1	0	0	0	1	1	2
WDTKMHAE	0-2-5	ND	4-6-7	0-1-1	0	2	5	0	0	0	4	6	7	0	1	1
WEIRDMKN	0-1-1	ND	ND	ND	0	1	1	0	0	0	0	0	0	0	0	0
WFQHNPKT	ND	ND	0-1-1	ND	0	0	0	0	0	0	0	1	1	0	0	0
WGNRSPLE	ND	ND	0-2-3	ND	0	0	0	0	0	0	0	2	3	0	0	0
WHAMFRKY	1-2-2	2-1-2	2-2-4	6-5-3	1	2	2	2	1	2	2	2	4	6	5	3
WHANENYP	ND	ND	0-1-1	ND	0	0	0	0	0	0	0	1	1	0	0	0
WHNFHMAI	2-8-8	ND	19-20-12	28-33-38	2	8	8	0	0	0	19	20	12	28	33	38
WHTWMKIF	2-3-4	1-0-1	2-4-5	3-2-2	2	3	4	1	0	1	2	4	5	3	2	2
WKIMYIRF	1-2-2	0-1-1	ND	2-2-1	1	2	2	0	1	1	0	0	0	2	2	1
WLIFVSNA	1-5-14	1-1-2	8-10-18	2-3-5	1	5	14	1	1	2	8	10	18	2	3	5
WLMMHFQE	1-2-2	0-1-1	2-4-6	1-2-3	1	2	2	0	1	1	2	4	6	1	2	3
WLNHYHRK	2-4-5	0-1-1	6-6-8	1-1-2	2	4	5	0	1	1	6	6	8	1	1	2
WLNTSRQA	1-1-2	0-0-1	1-2-2	0-1-1	1	1	2	0	0	1	1	2	2	0	1	1
WNMLKDDM	0-1-2	ND	1-2-3	0-1-1	0	1	2	0	0	0	1	2	3	0	1	1
WNSEDILT	ND	ND	1-1-2	ND	0	0	0	0	0	0	1	1	2	0	0	0
WPMGMYAS	0-0-2	ND	3-1-1	ND	0	0	2	0	0	0	3	1	1	0	0	0
WPQKPRIG	0-1-4	ND	2-5-6	0-0-1	0	1	4	0	0	0	2	5	6	0	0	1
WPQRRGMX	ND	ND	ND	0-1-2	0	0	0	0	0	0	0	0	0	0	1	2
WPSMNKVG	1-2-4	ND	5-6-9	1-2-4	1	2	4	0	0	0	5	6	9	1	2	4
WPVEYMQD	ND	ND	0-1-1	ND	0	0	0	0	0	0	0	1	1	0	0	0
WRIMQGKK	7-8-4	1-3-5	6-2-0	5-5-8	7	8	4	1	3	5	6	2	0	5	5	8
WSKINGXX	0-0-1	ND	ND	ND	0	0	1	0	0	0	0	0	0	0	0	0
WSLYRMIR	ND	ND	3-1-1	3-1-4	0	0	0	0	0	0	3	1	1	3	1	4
WTMANFLR	2-4-4	0-0-1	4-2-3	0-1-2	2	4	4	0	0	1	4	2	3	0	1	2
WTWYGVKF	ND	ND	1-2-3	ND	0	0	0	0	0	0	1	2	3	0	0	0
WVQMIKSK	ND	ND	0-1-1	ND	0	0	0	0	0	0	0	1	1	0	0	0
WVVKAXXX	ND	0-0-1	ND	ND	0	0	0	0	0	1	0	0	0	0	0	0
WYLAIQAV	0-0-1	ND	0-2-3	0-0-1	0	0	1	0	0	0	0	2	3	0	0	1
WYRKHSHQ	0-3-5	0-1-2	3-4-5	1-2-2	0	3	5	0	1	2	3	4	5	1	2	2
WYVQTADD	ND	ND	0-1-2	ND	0	0	0	0	0	0	0	1	2	0	0	0
XAGSWKGV	0-0-1	ND	0-1-1	ND	0	0	1	0	0	0	0	1	1	0	0	0
XALETGTI	0-0-1	ND	ND	ND	0	0	1	0	0	0	0	0	0	0	0	0
XASMRIYI	0-0-1	ND	ND	ND	0	0	1	0	0	0	0	0	0	0	0	0
XAVRAVEG	0-1-1	0-1-1	2-4-5	ND	0	1	1	0	1	1	2	4	5	0	0	0
XAWHANEN	0-2-2	0-0-1	0-0-1	ND	0	2	2	0	0	1	0	0	1	0	0	0
XDAWAPMV	0-0-1	0-0-1	ND	ND	0	0	1	0	0	1	0	0	0	0	0	0
XDELWVQM	ND	ND	0-1-2	ND	0	0	0	0	0	0	0	1	2	0	0	0
XDKQFTKG	ND	ND	0-0-1	ND	0	0	0	0	0	0	0	0	1	0	0	0
XEAWMTFI	ND	ND	0-0-2	ND	0	0	0	0	0	0	0	0	2	0	0	0
XELFDNRV	ND	ND	1-0-2	0-0-1	0	0	0	0	0	0	1	0	2	0	0	1
XEMKELGR	0-1-1	ND	1-2-2	ND	0	1	1	0	0	0	1	2	2	0	0	0
XENFPHLW	0-0-1	ND	0-1-1	ND	0	0	1	0	0	0	0	1	1	0	0	0
XEPLDMQK	ND	ND	0-1-1	ND	0	0	0	0	0	0	0	1	1	0	0	0
XFLKAHSD	0-0-1	ND	0-1-2	ND	0	0	1	0	0	0	0	1	2	0	0	0
XFSLSKMN	0-1-2	ND	5-8-12	1-2-2	0	1	2	0	0	0	5	8	12	1	2	2
XGIQSTYF	0-0-1	ND	0-0-1	ND	0	0	1	0	0	0	0	0	1	0	0	0
XGLYFRYE	2-3-10	1-2-2	ND	2-4-8	2	3	10	1	2	2	0	0	0	2	4	8
XGMYYKRF	ND	0-0-1	ND	1-1-2	0	0	0	0	0	1	0	0	0	1	1	2
XGSQVFSW	ND	ND	0-0-1	ND	0	0	0	0	0	0	0	0	1	0	0	0
XGWKTMAD	ND	ND	0-0-4	ND	0	0	0	0	0	0	0	0	4	0	0	0
XHAWFSVI	ND	ND	1-1-2	ND	0	0	0	0	0	0	1	1	2	0	0	0
XHLDWPQK	ND	1-0-2	ND	ND	0	0	0	1	0	2	0	0	0	0	0	0
XHNLFRLQ	1-1-3	0-0-1	1-3-3	1-1-2	1	1	3	0	0	1	1	3	3	1	1	2
XHRRVYLT	1-1-1	0-0-1	2-2-2	0-1-2	1	1	1	0	0	1	2	2	2	0	1	2
XKVHLPAE	0-0-1	0-0-1	0-1-1	0-0-1	0	0	1	0	0	1	0	1	1	0	0	1
XLAMYSFT	0-1-1	ND	2-2-2	0-1-1	0	1	1	0	0	0	2	2	2	0	1	1
XLLQATDE	0-0-1	0-0-1	ND	ND	0	0	1	0	0	1	0	0	0	0	0	0
XLMNNFAD	0-0-1	ND	ND	ND	0	0	1	0	0	0	0	0	0	0	0	0
XLQGISQE	0-0-1	ND	ND	ND	0	0	1	0	0	0	0	0	0	0	0	0
XLVATVYE	ND	ND	0-1-2	ND	0	0	0	0	0	0	0	1	2	0	0	0
XMRAYKEQ	0-0-1	ND	1-1-10	ND	0	0	1	0	0	0	1	1	10	0	0	0
XMYFKYIW	ND	ND	0-1-2	ND	0	0	0	0	0	0	0	1	2	0	0	0
XNAKHYSR	ND	0-0-1	ND	0-0-1	0	0	0	0	0	1	0	0	0	0	0	1
XNDNTIVY	ND	ND	0-0-1	ND	0	0	0	0	0	0	0	0	1	0	0	0
XNFMAFMK	ND	ND	ND	0-0-1	0	0	0	0	0	0	0	0	0	0	0	1
XNMRPFKH	0-1-1	ND	1-1-1	ND	0	1	1	0	0	0	1	1	1	0	0	0
XNNFVKAG	ND	ND	1-3-3	0-0-1	0	0	0	0	0	0	1	3	3	0	0	1
XPDFYLGR	ND	ND	1-2-2	ND	0	0	0	0	0	0	1	2	2	0	0	0
XPSFNMYG	1-1-1	ND	1-1-1	0-1-1	1	1	1	0	0	0	1	1	1	0	1	1
XPWKDMRQ	1-2-2	1-1-2	ND	1-1-1	1	2	2	1	1	2	0	0	0	1	1	1
XQEGHQSN	ND	ND	0-1-2	0-0-3	0	0	0	0	0	0	0	1	2	0	0	3
XQGHETRW	ND	ND	0-0-1	ND	0	0	0	0	0	0	0	0	1	0	0	0
XQLEMHEP	ND	ND	0-1-1	ND	0	0	0	0	0	0	0	1	1	0	0	0
XQMKKTLV	ND	ND	2-1-1	1-1-3	0	0	0	0	0	0	2	1	1	1	1	3
XREANYHE	0-0-1	ND	2-2-5	ND	0	0	1	0	0	0	2	2	5	0	0	0
XRMENYMV	1-1-0	ND	ND	ND	1	1	0	0	0	0	0	0	0	0	0	0
XRNMEFKH	0-1-1	ND	1-2-3	ND	0	1	1	0	0	0	1	2	3	0	0	0
XRPVMEFA	1-0-0	ND	ND	ND	1	0	0	0	0	0	0	0	0	0	0	0
XSAMMKIG	1-1-2	ND	2-2-2	1-1-1	1	1	2	0	0	0	2	2	2	1	1	1
XSMQFNVK	1-1-1	ND	4-4-5	0-1-1	1	1	1	0	0	0	4	4	5	0	1	1
XTNMYQAG	ND	ND	0-0-1	ND	0	0	0	0	0	0	0	0	1	0	0	0
XVLRFIEN	ND	ND	0-1-2	ND	0	0	0	0	0	0	0	1	2	0	0	0
XVMFLREK	1-2-3	1-1-1	2-3-3	1-1-2	1	2	3	1	1	1	2	3	3	1	1	2
XVSPAPTY	ND	ND	ND	0-0-1	0	0	0	0	0	0	0	0	0	0	0	1
XVYHKWDT	0-1-2	ND	0-0-1	ND	0	1	2	0	0	0	0	0	1	0	0	0
XWILAGMQ	0-0-7	ND	5-6-4	0-1-2	0	0	7	0	0	0	5	6	4	0	1	2
XWLAKEDQ	ND	ND	0-0-1	ND	0	0	0	0	0	0	0	0	1	0	0	0
XXADIVAN	0-0-1	0-3-1	ND	ND	0	0	1	0	3	1	0	0	0	0	0	0
XXAPSLIA	ND	1-2-1	ND	ND	0	0	0	1	2	1	0	0	0	0	0	0
XXAWHANE	ND	1-0-0	ND	ND	0	0	0	1	0	0	0	0	0	0	0	0
XXDAWAPM	1-1-1	ND	ND	ND	1	1	1	0	0	0	0	0	0	0	0	0
XXDDRQKE	0-0-1	ND	ND	ND	0	0	1	0	0	0	0	0	0	0	0	0
XXEAWMTF	ND	ND	1-1-0	ND	0	0	0	0	0	0	1	1	0	0	0	0
XXEVDNTK	0-0-1	ND	0-0-1	ND	0	0	1	0	0	0	0	0	1	0	0	0
XXFDWWGN	0-1-1	ND	ND	ND	0	1	1	0	0	0	0	0	0	0	0	0
XXFNEYAM	ND	ND	ND	1-0-0	0	0	0	0	0	0	0	0	0	1	0	0
XXGPKLTY	ND	ND	ND	0-1-1	0	0	0	0	0	0	0	0	0	0	1	1
XXGRDLHT	0-1-1	ND	0-0-1	ND	0	1	1	0	0	0	0	0	1	0	0	0
XXHNLFRL	ND	0-1-1	ND	ND	0	0	0	0	1	1	0	0	0	0	0	0
XXHRRVYL	1-0-0	ND	ND	ND	1	0	0	0	0	0	0	0	0	0	0	0
XXIEPPWV	ND	ND	ND	0-1-1	0	0	0	0	0	0	0	0	0	0	1	1
XXIKVYDW	0-0-1	ND	0-0-2	ND	0	0	1	0	0	0	0	0	2	0	0	0
XXINDFLV	ND	0-0-1	ND	ND	0	0	0	0	0	1	0	0	0	0	0	0
XXKSHTND	ND	ND	ND	0-0-1	0	0	0	0	0	0	0	0	0	0	0	1
XXLAMYSF	ND	ND	1-0-0	ND	0	0	0	0	0	0	1	0	0	0	0	0
XXMLDKLM	ND	ND	0-0-1	ND	0	0	0	0	0	0	0	0	1	0	0	0
XXMSYQWQ	ND	0-1-1	ND	ND	0	0	0	0	1	1	0	0	0	0	0	0
XXMYFKYI	0-1-1	ND	2-3-5	0-1-2	0	1	1	0	0	0	2	3	5	0	1	2
XXNHQLAW	ND	0-1-1	1-0-0	ND	0	0	0	0	1	1	1	0	0	0	0	0
XXNLSEDW	0-0-1	ND	ND	ND	0	0	1	0	0	0	0	0	0	0	0	0
XXPDFYLG	0-1-1	ND	ND	ND	0	1	1	0	0	0	0	0	0	0	0	0
XXPHWQRV	0-0-1	ND	ND	ND	0	0	1	0	0	0	0	0	0	0	0	0
XXQGHETR	0-0-1	ND	ND	ND	0	0	1	0	0	0	0	0	0	0	0	0
XXQLEMHE	ND	ND	0-0-1	ND	0	0	0	0	0	0	0	0	1	0	0	0
XXRKWQSP	0-0-1	ND	0-1-1	ND	0	0	1	0	0	0	0	1	1	0	0	0
XXRPVMEF	2-2-2	ND	ND	ND	2	2	2	0	0	0	0	0	0	0	0	0
XXSAMMKI	ND	ND	ND	2-2-2	0	0	0	0	0	0	0	0	0	2	2	2
XXSFIEPD	ND	ND	ND	0-0-1	0	0	0	0	0	0	0	0	0	0	0	1
XXWFQHNP	ND	ND	0-0-1	ND	0	0	0	0	0	0	0	0	1	0	0	0
XXWLAKED	ND	ND	0-1-1	ND	0	0	0	0	0	0	0	1	1	0	0	0
XXWWYHYG	ND	ND	ND	0-0-1	0	0	0	0	0	0	0	0	0	0	0	1
XXXADARK	ND	1-0-1	ND	ND	0	0	0	1	0	1	0	0	0	0	0	0
XXXAKGMG	ND	ND	ND	0-0-1	0	0	0	0	0	0	0	0	0	0	0	1
XXXDPGSF	1-1-1	ND	ND	0-1-2	1	1	1	0	0	0	0	0	0	0	1	2
XXXESIEY	ND	1-0-1	ND	ND	0	0	0	1	0	1	0	0	0	0	0	0
XXXEYPRP	ND	0-1-1	ND	ND	0	0	0	0	1	1	0	0	0	0	0	0
XXXGLYFR	1-0-0	ND	ND	ND	1	0	0	0	0	0	0	0	0	0	0	0
XXXGPKLT	ND	ND	0-0-1	ND	0	0	0	0	0	0	0	0	1	0	0	0
XXXGSQVF	ND	2-0-1	0-1-1	0-1-1	0	0	0	2	0	1	0	1	1	0	1	1
XXXHEQEY	ND	ND	ND	0-0-1	0	0	0	0	0	0	0	0	0	0	0	1
XXXIKVYD	ND	ND	0-0-1	ND	0	0	0	0	0	0	0	0	1	0	0	0
XXXKSHTN	0-1-1	ND	ND	ND	0	1	1	0	0	0	0	0	0	0	0	0
XXXLDGYW	ND	ND	0-0-1	ND	0	0	0	0	0	0	0	0	1	0	0	0
XXXLPNGQ	ND	ND	ND	0-0-1	0	0	0	0	0	0	0	0	0	0	0	1
XXXLVATV	ND	ND	0-2-1	ND	0	0	0	0	0	0	0	2	1	0	0	0
XXXMGNNG	ND	ND	1-0-1	ND	0	0	0	0	0	0	1	0	1	0	0	0
XXXMIVQH	0-0-1	ND	ND	ND	0	0	1	0	0	0	0	0	0	0	0	0
XXXMMVDQ	ND	ND	0-0-1	ND	0	0	0	0	0	0	0	0	1	0	0	0
XXXMSYQW	0-0-1	ND	ND	ND	0	0	1	0	0	0	0	0	0	0	0	0
XXXNDNTI	ND	ND	1-0-0	ND	0	0	0	0	0	0	1	0	0	0	0	0
XXXNFMAF	0-0-1	ND	ND	ND	0	0	1	0	0	0	0	0	0	0	0	0
XXXNLSED	1-1-1	ND	ND	ND	1	1	1	0	0	0	0	0	0	0	0	0
XXXNQIIW	ND	ND	ND	1-1-1	0	0	0	0	0	0	0	0	0	1	1	1
XXXPDFYL	ND	ND	1-0-0	ND	0	0	0	0	0	0	1	0	0	0	0	0
XXXPETGH	ND	ND	ND	0-0-1	0	0	0	0	0	0	0	0	0	0	0	1
XXXPKDRW	ND	ND	1-0-1	ND	0	0	0	0	0	0	1	0	1	0	0	0
XXXRLVHR	ND	ND	0-0-1	0-0-1	0	0	0	0	0	0	0	0	1	0	0	1
XXXSAMMK	ND	ND	ND	1-1-1	0	0	0	0	0	0	0	0	0	1	1	1
XXXSFIEP	0-0-1	ND	ND	ND	0	0	1	0	0	0	0	0	0	0	0	0
XXXSKLGQ	ND	0-0-1	ND	ND	0	0	0	0	0	1	0	0	0	0	0	0
XXXTEIWE	ND	ND	0-0-1	ND	0	0	0	0	0	0	0	0	1	0	0	0
XXXTHATP	0-0-1	ND	ND	ND	0	0	1	0	0	0	0	0	0	0	0	0
XXXTNMYQ	0-0-1	1-0-1	ND	ND	0	0	1	1	0	1	0	0	0	0	0	0
XXXVDYIE	ND	ND	0-0-1	ND	0	0	0	0	0	0	0	0	1	0	0	0
XXXVLRFI	ND	ND	1-1-1	1-1-1	0	0	0	0	0	0	1	1	1	1	1	1
XXXVYHKW	ND	ND	1-1-1	ND	0	0	0	0	0	0	1	1	1	0	0	0
XXXYWMST	1-1-1	ND	2-3-4	0-0-2	1	1	1	0	0	0	2	3	4	0	0	2
XXYAFMQV	ND	0-0-1	ND	1-2-2	0	0	0	0	0	1	0	0	0	1	2	2
XXYWMSTH	1-1-1	0-1-1	ND	0-1-1	1	1	1	0	1	1	0	0	0	0	1	1
XYAFMQVA	ND	ND	1-1-1	0-1-1	0	0	0	0	0	0	1	1	1	0	1	1
XYQLLTMN	0-0-3	ND	2-4-4	0-1-2	0	0	3	0	0	0	2	4	4	0	1	2
YAFMQVAI	0-1-2	ND	0-1-1	ND	0	1	2	0	0	0	0	1	1	0	0	0
YAQNKHAX	ND	ND	0-1-1	ND	0	0	0	0	0	0	0	1	1	0	0	0
YASQKHWE	0-0-1	ND	ND	ND	0	0	1	0	0	0	0	0	0	0	0	0
YDFWIQNL	ND	ND	0-1-1	0-0-1	0	0	0	0	0	0	0	1	1	0	0	1
YEKQRFHP	0-0-1	ND	ND	ND	0	0	1	0	0	0	0	0	0	0	0	0
YFRMIRWA	1-2-3	0-0-1	3-3-1	2-3-4	1	2	3	0	0	1	3	3	1	2	3	4
YGRLWIHK	1-2-5	ND	3-3-3	ND	1	2	5	0	0	0	3	3	3	0	0	0
YGVKFRXX	1-3-7	ND	ND	3-5-10	1	3	7	0	0	0	0	0	0	3	5	10
YHKWDTQD	ND	ND	0-0-4	ND	0	0	0	0	0	0	0	0	4	0	0	0
YKEQTNGN	ND	ND	0-0-1	ND	0	0	0	0	0	0	0	0	1	0	0	0
YKLSNWFF	ND	ND	0-0-1	ND	0	0	0	0	0	0	0	0	1	0	0	0
YKRFMAHW	2-1-1	0-2-3	0-0-1	0-1-1	2	1	1	0	2	3	0	0	1	0	1	1
YMVLTKAA	ND	0-0-1	ND	1-2-1	0	0	0	0	0	1	0	0	0	1	2	1
YNQMRGFX	ND	ND	0-2-2	0-0-1	0	0	0	0	0	0	0	2	2	0	0	1
YPLKFTKV	7-8-7	5-6-7	7-7-8	6-6-7	7	8	7	5	6	7	7	7	8	6	6	7
YPMFVKIS	2-1-2	1-1-1	2-2-2	2-3-2	2	1	2	1	1	1	2	2	2	2	3	2
YQINQKHX	1-2-3	ND	2-2-1	1-3-2	1	2	3	0	0	0	2	2	1	1	3	2
YQLLTMNE	1-0-6	ND	1-1-1	ND	1	0	6	0	0	0	1	1	1	0	0	0
YRKHSHQL	0-0-3	ND	1-2-2	ND	0	0	3	0	0	0	1	2	2	0	0	0
YRMHVQLG	0-1-4	ND	3-3-3	0-1-2	0	1	4	0	0	0	3	3	3	0	1	2
YTLKGEHX	ND	ND	0-1-2	ND	0	0	0	0	0	0	0	1	2	0	0	0
YTSQIPAX	ND	ND	0-0-1	ND	0	0	0	0	0	0	0	0	1	0	0	0
YVLGWLNT	0-1-2	ND	0-2-1	ND	0	1	2	0	0	0	0	2	1	0	0	0
YVTASRGX	ND	ND	ND	0-0-1	0	0	0	0	0	0	0	0	0	0	0	1
YWDHKFEM	ND	ND	1-0-1	ND	0	0	0	0	0	0	1	0	1	0	0	0
YYKRFMAH	2-1-1	1-2-3	4-5-2	1-1-1	2	1	1	1	2	3	4	5	2	1	1	1

## Sheet: Cleavages By Catergory
All White Cell pH5.5 15 minutes	All White Cell pH5.5 60 minutes	All White Cell pH5.5 240 minutes		All Opaque Cell pH5.5 15 minutes	All Opaque Cell pH5.5 60 minutes	All Opaque Cell pH5.5 240 minutes		All White Cell pH7.4 15 minutes	All White Cell pH7.4 60 minutes	All White Cell pH7.4 240 minutes		All Opaque Cell pH7.4 15 minutes	All Opaque Cell pH7.4 60 minutes	All Opaque Cell pH7.4 240 minutes		White Cell Only pH5.5 15 minutes	White Cell Only pH5.5 60 minutes	White Cell Only pH5.5 240 minutes		Opaque Cell Only pH5.5 15 minutes	Opaque Cell Only pH5.5 60 minutes	Opaque Cell Only pH5.5 240 minutes		White Cell Only pH7.4 15 minutes	White Cell Only pH7.4 60 minutes	White Cell Only pH7.4 240 minutes		Opaque Cell Only pH7.4 15 minutes	Opaque Cell Only pH7.4 60 minutes	Opaque Cell Only pH7.4 240 minutes		Common pH5.5 15 minutes	Common pH5.5 60 minutes	Common pH5.5 240 minutes		Common pH7.4 15 minutes	Common pH7.4 60 minutes	Common pH7.4 240 minutes
AFMKWHEG	AFMKWHEG	AEIMQTTQ		AFMKWHEG	AEIMQTTQ	AEIMQTTQ		AFMKWHEG	AFMKWHEG	AFMKWHEG		AFMKWHEG	AFMKWHEG	AFMKWHEG		AGILKLMP	AGILKLMP	AGILKLMP		AFMQVAIT	AEIMQTTQ	AESLMSXX		EVNDDVKX	AGILKLMP	EYMQDXXX		AFNLYALX	AFNLYALX	AFMQVAIT		AFMKWHEG	AFMKWHEG	AEIMQTTQ		AFMKWHEG	AFMKWHEG	AFMKWHEG
AGILKLMP	AFMQVAIT	AFMKWHEG		AFMQVAIT	AESLMSXX	AESLMSXX		EVNDDVKX	AGILKLMP	AGILKLMP		AFNLYALX	AFNLYALX	AFMQVAIT		AMFRKYPI	AKHYSRQW	AKHYSRQW		AFNLYALX	AESLMSXX	AHNAWMXX		EYMQDXXX	FGIFYLNG	HHVNWYKR		ARKYWNVH	AMMKIGEV	AFNLYALX		ARKYWNVH	AFMQVAIT	AFMKWHEG		FRIRSGTX	ARKYWNVH	AGILKLMP
AMFRKYPI	AGILKLMP	AFMQVAIT		AFNLYALX	AFMKWHEG	AFMKWHEG		EYMQDXXX	ARKYWNVH	APSLIAKW		ARKYWNVH	AMMKIGEV	AFNLYALX		ASQKHWEE	ASQKHWEE	ASQKHWEE		AGMSFMMX	AFNLYALX	ALQHTFXX		FMAHWVGI	FMAHWVGI	HRNWRAQH		ASMRIYIE	APSLIAKW	AIQAVXXX		ASMRIYIE	AHLFNAMT	AFMQVAIT		GIKMWQSM	AVMFMSKX	APSLIAKW
ARKYWNVH	AHLFNAMT	AFNLYALX		AGMSFMMX	AFMQVAIT	AFMQVAIT		FMAHWVGI	AVMFMSKX	ARKYWNVH		ASMRIYIE	APSLIAKW	AGILKLMP		EVNDDVKX	ETQWSKIN	ASTSPHMI		AHLFNAMT	AGMSFMMX	ARSAFAEM		HRNWRAQH	HRLFTYFR	ILMFYWHE		AVMFMSKX	ASMRIYIE	AMMKIGEV		AVMFMSKX	AMMKIGEV	AFNLYALX		HAMFRKYP	DGIYRMHV	ARKYWNVH
ASMRIYIE	AKHYSRQW	AGILKLMP		AHLFNAMT	AFNLYALX	AFNLYALX		FRIRSGTX	DGIYRMHV	ASQKHWEE		AVMFMSKX	ARKYWNVH	AIQAVXXX		FNVKSHPE	EYQFVTYK	DMRQQYLN		AMMKIGEV	ANMQILDP	ATVYEFGH		ISQWMWEI	HRNWRAQH	ISQWMWEI		DAQRWKNI	ASQKHWEE	AQNKHAXX		DARKYWNV	ARKYWNVH	AGMSFMMX		HRLFTYFR	EGIKMWQS	ASQKHWEE
ASQKHWEE	AMMKIGEV	AGMSFMMX		AMMKIGEV	AGMSFMMX	AGMSFMMX		GIKMWQSM	EGIKMWQS	AVMFMSKX		DAQRWKNI	ASMRIYIE	AMMKIGEV		FPMHNGRV	FHMAIGAR	EIFRKWHX		ANMQILDP	APSLIAKW	AWKFGIFY		MHRNWRAQ	MHRNWRAQ	KRISQWMW		DGIYRMHV	DAQRWKNI	ARINTTFD		DEAHNAWM	ASMRIYIE	AHLFNAMT		HVKLFRFN	EVNDDVKX	AVMFMSKX
AVMFMSKX	ARKYWNVH	AHLFNAMT		ANMQILDP	AHLFNAMT	AHLFNAMT		HAMFRKYP	EVNDDVKX	DGIYRMHV		DGIYRMHV	ASQKHWEE	APSLIAKW		FRIRSGTX	FNVKSHPE	EKQRFHPX		APSLIAKW	AQNKHAXX	AWMTFIVP		MKWTRVLF	RFMAHWVG	KVFMPYYG		EGIKMWQS	DMQKQRYF	ASMRIYIE		DFGVWKAI	AVMFMSKX	AMMKIGEV		IKILMFYW	FRIRSGTX	DGIYRMHV
DARKYWNV	ASMRIYIE	AKHYSRQW		APSLIAKW	AMMKIGEV	AHNAWMXX		HRLFTYFR	FGIFYLNG	EGIKMWQS		EGIKMWQS	AVMFMSKX	AQNKHAXX		FTQRAGIL	FPMHNGRV	ETGHWLMM		AQNKHAXX	ARINTTFD	DFYLGRSV		PYQDAXXX	WAFRIRSG	KYIWYVQT		EKQRFHPX	DQIYKLSN	DAQRWKNI		DQVRRMNX	DAQRWKNI	ANMQILDP		KFTKVMQQ	GHVKLFRF	EGIKMWQS
DEAHNAWM	ASQKHWEE	AMMKIGEV		AQNKHAXX	ANMQILDP	ALQHTFXX		HRNWRAQH	FMAHWVGI	EVNDDVKX		EKQRFHPX	DAQRWKNI	ARINTTFD		GILKLMPX	FRIRSGTX	ETQWSKIN		ARINTTFD	ARSAFAEM	DHFYTSQI		WAFRIRSG	XAVRAVEG	LFFWAXXX		ESKYFMQX	DQRYYVMN	DARKYWNV		EAVMFMSK	DARKYWNV	APSLIAKW		KVMYWHFX	GIKMWQSM	EVNDDVKX
DFGVWKAI	AVMFMSKX	ANMQILDP		ARINTTFD	APSLIAKW	AMMKIGEV		HVKLFRFN	FRIRSGTX	EYMQDXXX		ESKYFMQX	DGIYRMHV	ARKYWNVH		HNFHMAIG	FRMIRWAV	EVARPLGX		ARSAFAEM	ATVYEFGH	DIMEMLYX		XHLDWPQK	XXADIVAN	LVMYNEWN		ETFDKXXX	DQVRRMNX	DHKFEMLT		EGIKMWQS	DEAHNAWM	AQNKHAXX		LAGKRRDW	GILKLMPX	FGIFYLNG
DQVRRMNX	DAQRWKNI	APSLIAKW		ARKYWNVH	AQNKHAXX	ANMQILDP		IKILMFYW	GHVKLFRF	FGIFYLNG		ETFDKXXX	DMQKQRYF	ASMRIYIE		HRLFTYFR	FTQRAGIL	EVNDDVKX		AWMTFIVP	AWMTFIVP	DIQFATAN		XXAPSLIA	XXAPSLIA	MHRNWRAQ		EYAMWRLD	EKQRFHPX	DIQFATAN		EQTHNYRP	DFGVWKAI	ARINTTFD		LAMYSFTP	GRLWIHKX	FHIVKWAS
EAVMFMSK	DARKYWNV	AQNKHAXX		ARSAFAEM	ARINTTFD	APSLIAKW		ISQWMWEI	GIKMWQSM	FHIVKWAS		EYAMWRLD	DQIYKLSN	ASQKHWEE		ILMFYWHE	GILKLMPX	FAWDESNG		DAQRWKNI	DFYLGRSV	DIVANFTG		XXAWHANE	XXHNLFRL	MQGKKAPX		FGIFYLNG	EQTHNYRP	DLRWMAYE		EYQFVTYK	DGIYRMHV	ARKYWNVH		LFTYFRAW	HAMFRKYP	FLVRTWKM
EGIKMWQS	DEAHNAWM	ARINTTFD		ASMRIYIE	ARKYWNVH	AQNKHAXX		KFTKVMQQ	GILKLMPX	FLVRTWKM		FGIFYLNG	DQRYYVMN	AVMFMSKX		KILMFYWH	GVKFRXXX	FEMLTWXX		DGIYRMHV	DIMEMLYX	DKLMNWPQ		XXXADARK	XXMSYQWQ	QMKKTLVM		FLVRTWKM	ESKYFMQX	DMQKQRYF		FGIFYLNG	DHKFEMLT	ASMRIYIE		LIAKWVGF	HESKYFMQ	FMAHWVGI
EQTHNYRP	DFGVWKAI	ARKYWNVH		AVMFMSKX	ARSAFAEM	ARINTTFD		KVMYWHFX	GRLWIHKX	FMAHWVGI		FLVRTWKM	DQVRRMNX	DAQRWKNI		KIMYIRFN	HLFNAMTW	FHMAIGAR		DHKFEMLT	DIQFATAN	DLRWMAYE		XXXESIEY	XXNHQLAW	RFMAHWVG		FNLYALXX	ETFDKXXX	DQIYKLSN		FLVRTWKM	DINMSVSL	AVMFMSKX		LNMKWTRV	HIVKWASX	FNVKSHPE
EVNDDVKX	DGIYRMHV	ASMRIYIE		AWMTFIVP	ASMRIYIE	ARKYWNVH		LAGKRRDW	HAMFRKYP	FNVKSHPE		FNLYALXX	EGIKMWQS	DARKYWNV		LFNAMTWP	HNFHMAIG	FKHDVQVM		DINMSVSL	DIVANFTG	DNSKFQPX		XXXGSQVF	XXXEYPRP	RTQKEYQF		FRKWHXXX	FHWRIMQG	DQRYYVMN		FMAFMKWH	DQIYKLSN	DAQRWKNI		LYRMIRQE	HTNKRISQ	FRIRSGTX
EYQFVTYK	DHKFEMLT	ASQKHWEE		DAQRWKNI	ATVYEFGH	ARSAFAEM		LAMYSFTP	HESKYFMQ	FRIRSGTX		FRIRSGTX	EKQRFHPX	DGIYRMHV		LFTYFRAW	HPFKVHXX	FNEYAMWR		DIQFATAN	DKLMNWPQ	DRGWYLAI		XXXTNMYQ		SHTNDLPL		FRSRYHGP	FLVRTWKM	DQVRRMNX		FRSRYHGP	DQRYYVMN	DARKYWNV		MFRKYPIM	HVKLFRFN	FRKWHXXX
FGIFYLNG	DINMSVSL	ASTSPHMI		DARKYWNV	AVMFMSKX	ASMRIYIE		LFTYFRAW	HIVKWASX	FRKWHXXX		FRKWHXXX	EQTHNYRP	DHKFEMLT		LVHRETQW	HRLFTYFR	FNVKSHPE		DIVANFTG	DLRWMAYE	DSIRHQGP				TRLNGEAV		FTYFRAWX	FMAFMKWH	DWAFRIRS		FVTYKMDX	DQVRRMNX	DEAHNAWM		MWSLYRMI	IFRKWHXX	FVTYKMDX
FLVRTWKM	DQIYKLSN	AVMFMSKX		DEAHNAWM	AWMTFIVP	ATVYEFGH		LIAKWVGF	HRLFTYFR	FVTYKMDX		FRSRYHGP	ESKYFMQX	DIQFATAN		MHRNWRAQ	IEHKDQVR	FPMHNGRV		DMQKQRYF	DMQKQRYF	DSQESARD				WVVKAXXX		FVTYKMDX	FNLYALXX	DYQKERLF		GHEMNLQX	EAVMFMSK	DFGVWKAI		NFMAFMKW	IKILMFYW	GHVKLFRF
FMAFMKWH	DQRYYVMN	DAQRWKNI		DFGVWKAI	DAQRWKNI	AVMFMSKX		LNMKWTRV	HRNWRAQH	GHVKLFRF		FTYFRAWX	ETFDKXXX	DLRWMAYE		MKWTRVLF	ILMFYWHE	FRIRSGTX		DNSKFQPX	DNSKFQPX	DWAFRIRS				XAVRAVEG		GHMYNXXX	FNMYGYDL	EAVMFMSK		GIKMWQSM	EGIKMWQS	DGIYRMHV		RMIRWAVL	KFTKVMQQ	GIKMWQSM
FNVKSHPE	DQVRRMNX	DARKYWNV		DGIYRMHV	DARKYWNV	AWKFGIFY		LYRMIRQE	HTNKRISQ	GIKMWQSM		FVTYKMDX	EVNDDVKX	DMQKQRYF		MQGHVNST	INSYNMWA	FRLQDEQA		DQIYKLSN	DPRYNHTQ	DWDFNRXX				XAWHANEN		GHVKLFRF	FNVKSHPE	EIRDMKNL		GRLWIHKX	EKQRFHPX	DHKFEMLT		RVIFFRLN	KVMYWHFX	GILKLMPX
FPMHNGRV	EAVMFMSK	DEAHNAWM		DHKFEMLT	DEAHNAWM	AWMTFIVP		MFRKYPIM	HVKLFRFN	GILKLMPX		GHMYNXXX	FHWRIMQG	DQIYKLSN		PPNRDEGW	KIMYIRFN	FRMIRWAV		DQRYYVMN	DRGWYLAI	EANYHEQS				XDAWAPMV		GHVNSTQX	FPMHNGRV	EKQRFHPX		HAMFRKYP	EQTHNYRP	DINMSVSL		TSIKVFMP	LAGKRRDW	GRLWIHKX
FRIRSGTX	EGIKMWQS	DFGVWKAI		DINMSVSL	DFGVWKAI	DAQRWKNI		MHRNWRAQ	IFRKWHXX	GRLWIHKX		GHVKLFRF	FLVRTWKM	DQRYYVMN		QNSDPKAG	LFFWAXXX	FTQRAGIL		DYQKERLF	DTKMHAEN	EDNYEVWV				XHLDWPQK		GILKLMPX	FRSRYHGP	EPHSKVNF		HHVNWYKR	ERLFFWAX	DMQKQRYF		TWMKIFNT	LAMYSFTP	HAMFRKYP
FRSRYHGP	EKQRFHPX	DGIYRMHV		DIQFATAN	DFYLGRSV	DARKYWNV		MKWTRVLF	IKILMFYW	HAMFRKYP		GHVNSTQX	FMAFMKWH	DQVRRMNX		QWSKINGX	LFNAMTWP	GDQRYYVM		EKQRFHPX	DWDFNRXX	EGVKNQDR				XLLQATDE		GRLWIHKX	FTYFRAWX	ERLFFWAX		HIVKWASX	EWLHPFKV	DPRYNHTQ		TYKMDXXX	LFTYFRAW	HESKYFMQ
FTQRAGIL	EQTHNYRP	DHKFEMLT		DIVANFTG	DGIYRMHV	DEAHNAWM		MWSLYRMI	KFTKVMQQ	HESKYFMQ		GIKMWQSM	FNLYALXX	DWAFRIRS		RMENYMVL	LFTYFRAW	GEAVMFMS		ERLFFWAX	DYQKERLF	ELDTQKWX				XXADIVAN		HESKYFMQ	FVTYKMDX	ESKYFMQX		HMIALYWG	EYMQDXXX	DQIYKLSN		VHMRYINV	LIAKWVGF	HIVKWASX
FVTYKMDX	ERLFFWAX	DINMSVSL		DMQKQRYF	DHKFEMLT	DFGVWKAI		NFMAFMKW	KVMYWHFX	HHVNWYKR		GILKLMPX	FNMYGYDL	DYQKERLF		RTQKEYQF	LKINSYNM	GILKLMPX		EYMQDXXX	EANYHEQS	EMVHYQIN				XXAPSLIA		HIVKWASX	FWIQNLPX	ETFDKXXX		HTNKRISQ	FGIFYLNG	DQRYYVMN		VKLFRFNW	LNMKWTRV	HRLFTYFR
GHEMNLQX	ETQWSKIN	DMQKQRYF		DNSKFQPX	DIMEMLYX	DFYLGRSV		PYQDAXXX	LAGKRRDW	HIVKWASX		GRLWIHKX	FNVKSHPE	EAVMFMSK		RVIFFRLN	LVHRETQW	GSMGANHT		EYSWMNLI	EDNYEVWV	EWELDTQK				XXHNLFRL		HMIALYWG	GAQYMMGQ	EYAMWRLD		HVKLFRFN	FHIVKWAS	DQVRRMNX		WHAMFRKY	LYRMIRQE	HTNKRISQ
GIKMWQSM	EWLHPFKV	DMRQQYLN		DQIYKLSN	DINMSVSL	DGIYRMHV		RMIRWAVL	LAMYSFTP	HRLFTYFR		HAMFRKYP	FPMHNGRV	EGIKMWQS		SQVKHMEX	MAIGARSD	GSWKGVRN		FGVWKAIL	EIMQTTQM	EYSWMNLI				XXINDFLV		IFRKWHXX	GHGYHQXX	EYQFVTYK		IFRKWHXX	FLVRTWKM	DTKMHAEN		WHTWMKIF	MANFLRGP	HVKLFRFN
GILKLMPX	EYMQDXXX	DPRYNHTQ		DQRYYVMN	DIQFATAN	DHFYTSQI		RVIFFRLN	LFTYFRAW	HRNWRAQH		HESKYFMQ	FRIRSGTX	EIRDMKNL		TVNKQLRX	MIALYWGR	GVKFRXXX		FHIVKWAS	ELDTQKWX	FDEAHNAW				XXMSYQWQ		IKMWQSMX	GHVNSTQX	FHWRIMQG		IKILMFYW	FMAFMKWH	DYQKERLF		WLIFVSNA	MFRKYPIM	IFRKWHXX
GRLWIHKX	EYQFVTYK	DQIYKLSN		DQVRRMNX	DIVANFTG	DHKFEMLT		TSIKVFMP	LIAKWVGF	HTNKRISQ		HIVKWASX	FRSRYHGP	EKQRFHPX		VKLFRFNW	MKWTRVLF	HNFHMAIG		FHWRIMQG	EQEYFRMI	FGVWKAIL				XXNHQLAW		KIMYIRFN	GLYFRYEI	FIDLRWMA		IKMWQSMX	FNMYGYDL	EAVMFMSK		WRIMQGKK	MFVKISTT	IKILMFYW
HAMFRKYP	FGIFYLNG	DQRYYVMN		DYQKERLF	DKLMNWPQ	DIMEMLYX		TWMKIFNT	LNMKWTRV	HVKLFRFN		HMIALYWG	FTYFRAWX	EPHSKVNF		WAFRSRYH	MQGHVNST	HRLFTYFR		FMIEMHVI	EYSWMNLI	FHDLNPYM				XXXADARK		LMMHFQED	HMIALYWG	FMAFMKWH		KRISQWMW	FRSRYHGP	EGIKMWQS		XGLYFRYE	MKWTRVLF	IKMWQSMX
HHVNWYKR	FHIVKWAS	DQVRRMNX		EAVMFMSK	DLRWMAYE	DINMSVSL		TYKMDXXX	LYRMIRQE	IFRKWHXX		HRLFTYFR	FVTYKMDX	ERLFFWAX		WKIMYIRF	NEIFRKWH	IHGFEYVT		FNIGYKXX	FGVWKAIL	FHWRIMQG				XXXESIEY		LNHYHRKX	IFVSNAXX	FNEYAMWR		KVMYWHFX	FVTYKMDX	EIMQTTQM		XPWKDMRQ	MWSLYRMI	INDFLVRT
HIVKWASX	FHMAIGAR	DTKMHAEN		EGIKMWQS	DMQKQRYF	DIQFATAN		VHMRYINV	MANFLRGP	IKILMFYW		HVKLFRFN	FWIQNLPX	ESKYFMQX		XGLYFRYE	PHLWERTI	INSYNMWA		FNLYALXX	FHWRIMQG	FIDLRWMA				XXXEYPRP		MANFLRGP	IKMWQSMX	FNLYALXX		LAGKRRDW	GAQYMMGQ	EQEYFRMI		XVMFLREK	NFMAFMKW	IYRMHVQL
HMIALYWG	FLVRTWKM	DYQKERLF		EKQRFHPX	DNSKFQPX	DIVANFTG		VKLFRFNW	MFRKYPIM	IKMWQSMX		IFRKWHXX	GAQYMMGQ	ETFDKXXX		XPWKDMRQ	PPNRDEGW	IRWAVLXX		FNMYGYDL	FIDLRWMA	FKHDWYGT				XXXSKLGQ		MENYMVLT	ILMFYWHE	FNMYGYDL		LAMYSFTP	GDIMEMLY	EQTHNYRP		YPLKFTKV	NGMYWHYL	KFTKVMQQ
HNFHMAIG	FMAFMKWH	EAVMFMSK		EQTHNYRP	DPRYNHTQ	DKLMNWPQ		WAFRIRSG	MFVKISTT	ILMFYWHE		IKILMFYW	GHGYHQXX	EVNDDVKX		XRMENYMV	QNSDPKAG	KIMYIRFN		FTGHGYHQ	FIENMTLG	FMIEMHVI				XXXTNMYQ		MFVKISTT	INDFLVRT	FPMHNGRV		LIAKWVGF	GFEYVTAS	ERLFFWAX		YPMFVKIS	NQIRYRWA	KVMYWHFX
HRLFTYFR	FNMYGYDL	EGIKMWQS		ERLFFWAX	DQIYKLSN	DLRWMAYE		WHAMFRKY	MHRNWRAQ	INDFLVRT		IKMWQSMX	GHVKLFRF	EYAMWRLD		XRPVMEFA	QWSKINGX	LFNAMTWP		FVTKPNHQ	FMIEMHVI	FNIGYKXX						MIEMHVIX	KILMFYWH	FRSRYHGP		LMMHFQED	GHEMNLQX	ETVYADSS		YYKRFMAH	RMIRWAVL	LAGKRRDW
HTNKRISQ	FNVKSHPE	EIFRKWHX		EYMQDXXX	DQRYYVMN	DMQKQRYF		WHTWMKIF	MKWTRVLF	ISQWMWEI		KFTKVMQQ	GHVNSTQX	EYQFVTYK		XXDAWAPM	RMENYMVL	LFTYFRAW		FWIQNLPX	FNIGYKXX	FPGQHRIS						MYIRFNPF	KIMYIRFN	FTYFRAWX		LNHYHRKX	GHMYNXXX	EWLHPFKV			RRVYLTSP	LAMYSFTP
HVKLFRFN	FPMHNGRV	EIMQTTQM		EYQFVTYK	DQVRRMNX	DNSKFQPX		WLIFVSNA	MWSLYRMI	IYRMHVQL		KIMYIRFN	GIKMWQSM	FGIFYLNG		XXHRRVYL	RTQKEYQF	LKINSYNM		FYLGRSVP	FNLYALXX	FPVRPTEX						NHTWVVKA	LAIQAVXX	FWIQNLPX		LNIHFKFD	GHVNSTQX	EYFRMIRW			RVGKWSYR	LFTYFRAW
IFRKWHXX	FRIRSGTX	EKQRFHPX		EYSWMNLI	DRGWYLAI	DPRYNHTQ		WRIMQGKK	NFMAFMKW	KFTKVMQQ		KVMYWHFX	GILKLMPX	FHIVKWAS		XXRPVMEF	RVIFFRLN	LQDEQATV		GALHTSMD	FPVRPTEX	FRIHGFDE						NLYALXXX	LLTMNEIF	GAQYMMGQ		LNMKWTRV	GIKMWQSM	EYMQDXXX			RVIFFRLN	LIAKWVGF
IKILMFYW	FRMIRWAV	EQEYFRMI		FGIFYLNG	DTKMHAEN	DQIYKLSN		XGLYFRYE	NGMYWHYL	KRISQWMW		LAGKRRDW	GLYFRYEI	FHWRIMQG		XXXDPGSF	SQVKHMEX	LVHRETQW		GAQYMMGQ	FSIHEWEL	FSLSKMNP						NQIRYRWA	LMFYWHEF	GDQRYYVM		LSNWFFEQ	GLYFRYEI	EYQFVTYK			TNIRASVP	LKINSYNM
IKMWQSMX	FRSRYHGP	EQTHNYRP		FGVWKAIL	DWDFNRXX	DQRYYVMN		XHLDWPQK	NQIRYRWA	KVFMPYYG		LAMYSFTP	GRLWIHKX	FIDLRWMA		XXXGLYFR	TVNKQLRX	MAIGARSD		GDIMEMLY	FTGHGYHQ	FTGHGYHQ						QHRLFTYF	LMMHFQED	GHGYHQXX		LYRMIRQE	GRLWIHKX	FAEMWPDH			TSIKVFMP	LMMHFQED
ILMFYWHE	FTQRAGIL	ERLFFWAX		FHIVKWAS	DYQKERLF	DQVRRMNX		XPWKDMRQ	RFMAHWVG	KVMYWHFX		LFTYFRAW	HAMFRKYP	FLVRTWKM		XXXNLSED	VHSDAYVT	MENYMVLT		GDIQFATA	FTNMYXXX	FTNMYXXX						QMIKSKED	LNHYHRKX	GHMYNXXX		MANFLRGP	GVWKAILS	FGIFYLNG			TWMKIFNT	LNHYHRKX
KILMFYWH	FVTYKMDX	ETGHWLMM		FHWRIMQG	EANYHEQS	DRGWYLAI		XVMFLREK	RMIRWAVL	KYIWYVQT		LIAKWVGF	HESKYFMQ	FMAFMKWH		XXYWMSTH	VKLFRFNW	MFLREKQY		GHGYHQXX	FVTKPNHQ	FWIQNLPX						QMIRWHFS	LNIHFKFD	GHVNSTQX		MFVKISTT	HAMFRKYP	FHIVKWAS			TYKMDXXX	LNMKWTRV
KIMYIRFN	GAQYMMGQ	ETQWSKIN		FLVRTWKM	EAVMFMSK	DSIRHQGP		XXAPSLIA	RRVYLTSP	LAGKRRDW		LMMHFQED	HIVKWASX	FMAHWVGI		YGVKFRXX	WAFRSRYH	MHRNWRAQ		GHMYNXXX	FWIQNLPX	FYLGRSVP						QNKHAXXX	LSNWFFEQ	GHWLMMHF		MRQQYLNT	HHVNWYKR	FIENMTLG			VGMYWTLN	LYRMIRQE
KRISQWMW	GDIMEMLY	ETVYADSS		FMAFMKWH	EDNYEVWV	DSQESARD		XXAWHANE	RVGKWSYR	LAMYSFTP		LNHYHRKX	HMIALYWG	FNEYAMWR		YKRFMAHW	WEIRDMKN	MIEMHVIX		GHVKLFRF	FYLGRSVP	GALHTSMD						QWSKINGX	LVRTWKMP	GLTLALWX		MVIKKESS	HIVKWASX	FLVRTWKM			VHMRYINV	MANFLRGP
KVMYWHFX	GFEYVTAS	EVARPLGX		FMIEMHVI	EGIKMWQS	DTKMHAEN		XXXADARK	RVIFFRLN	LFFWAXXX		LNMKWTRV	HTNKRISQ	FNLYALXX			WKIMYIRF	MIGHVKLF		GHVNSTQX	GALHTSMD	GANHTWVV						RDMKNLAP	MENYMVLT	GLYFRYEI		NEAHMKTD	HMIALYWG	FMAFMKWH			VKLFRFNW	MFRKYPIM
LAGKRRDW	GHEMNLQX	EVNDDVKX		FNIGYKXX	EIMQTTQM	DWAFRIRS		XXXESIEY	TNIRASVP	LFTYFRAW		LYRMIRQE	HVKLFRFN	FNMYGYDL			XAWHANEN	MKIGEVAR		GHWLMMHF	GDIQFATA	GEDRNTFY						RVGKWSYR	MIALYWGR	GMSFMMXX		NFMAFMKW	HRRVYLTS	FNLYALXX			WAFRSRYH	MFVKISTT
LAMYSFTP	GHMYNXXX	EWLHPFKV		FNLYALXX	EKQRFHPX	DWDFNRXX		XXXGSQVF	TSIKVFMP	LIAKWVGF		MANFLRGP	IFRKWHXX	FNVKSHPE			XGLYFRYE	MKNLAPAN		GIFYLNGD	GEDRNTFY	GHGYHQXX						SMQFNVKS	MIEMHVIX	GVKFRXXX		NGMYWHYL	HTNKRISQ	FNMYGYDL			WHAMFRKY	MKWTRVLF
LFNAMTWP	GHVNSTQX	EYFRMIRW		FNMYGYDL	ELDTQKWX	DYQKERLF		XXXTNMYQ	TWMKIFNT	LKINSYNM		MENYMVLT	IFVSNAXX	FPMHNGRV			XPWKDMRQ	MKTDWWAY		GLYFITHX	GHGYHQXX	GHQSNKPP						TNIRASVP	MLKDDMGX	GVWKAILS		NHTWVVKA	HVKLFRFN	FRSRYHGP			WKIMYIRF	MRQQYLNT
LFTYFRAW	GIKMWQSM	EYMQDXXX		FRSRYHGP	EQEYFRMI	EANYHEQS		YPLKFTKV	TYKMDXXX	LMMHFQED		MFRKYPIM	IKILMFYW	FRIRSGTX			XRMENYMV	MKWTRVLF		GLYFRYEI	GHVKLFRF	GHTFQESM						TVNKQLRX	MRQQYLNT	GWYLAIQA		NQIRYRWA	IFRKWHXX	FSIHEWEL			WLIFVSNA	MWSLYRMI
LIAKWVGF	GILKLMPX	EYQFVTYK		FTGHGYHQ	EQTHNYRP	EAVMFMSK		YPMFVKIS	VGMYWTLN	LNHYHRKX		MFVKISTT	IKMWQSMX	FRKWHXXX			XVYHKWDT	MQGHVNST		GMSFMMXX	GHWLMMHF	GHWLMMHF						TYFRAWXX	MYIRFNPF	HMIALYWG		PVMEFATG	IHGFDEAH	FVTKPNHQ			WLMMHFQE	NDVDGGXX
LMMHFQED	GLYFRYEI	FAEMWPDH		FVTKPNHQ	ERLFFWAX	EDNYEVWV		YYKRFMAH	VHMRYINV	LNMKWTRV		MIEMHVIX	ILMFYWHE	FRSRYHGP			XXDAWAPM	NDFLVRTW		GRDTMFIX	GIFYLNGD	GIFYLNGD						TYGRLWIH	NGQMIRWH	HNLFRLQD		PVSQVLHX	IKILMFYW	FVTYKMDX			WLNHYHRK	NFMAFMKW
LNHYHRKX	GRLWIHKX	FAWDESNG		FVTYKMDX	EWLHPFKV	EGIKMWQS			VKLFRFNW	LVMYNEWN		MWSLYRMI	INDFLVRT	FTYFRAWX			XXFDWWGN	NDVDGGXX		GRGHEMNL	GIQSTYFH	GIQSTYFH						VFIDLRWM	NHTWVVKA	HRRVYLTS		QFVTYKMD	IKMWQSMX	GAQYMMGQ			WRIMQGKK	NGMYWHYL
LNIHFKFD	GVKFRXXX	FEMLTWXX		FWIQNLPX	EYMQDXXX	EGVKNQDR			WAFRIRSG	LYRMIRQE		MYIRFNPF	KFTKVMQQ	FVTYKMDX			XXGRDLHT	NEIFRKWH		GVWKAILS	GLTLALWX	GLTLALWX						VFILWRTE	NLYALXXX	HWRIMQGK		QHRLFTYF	IYRMHVQL	GDIMEMLY			WYRKHSHQ	NQIRYRWA
LNMKWTRV	GVWKAILS	FGIFYLNG		FYLGRSVP	EYSWMNLI	EIMQTTQM			WAFRSRYH	MANFLRGP		NFMAFMKW	KILMFYWH	FWIQNLPX			XXPDFYLG	PFKHDVQV		GWALQHTF	GLYFITHX	GLYFITHX						VYADSSEW	NPIKILMF	IFVSNAXX		QMIRWHFS	KERLFFWA	GDIQFATA			XGLYFRYE	PVSQVLHX
LSNWFFEQ	HAMFRKYP	FHIVKWAS		GALHTSMD	FGIFYLNG	ELDTQKWX			WHAMFRKY	MFRKYPIM		NHTWVVKA	KIMYIRFN	GAQYMMGQ			XXRPVMEF	PPNRDEGW		GWLNTSRQ	GMSFMMXX	GMIQYLXX						WAFRSRYH	PTVNKQLR	IGPTAAYH		QTERHVYF	KILMFYWH	GFEYVTAS			XPWKDMRQ	PYQDAXXX
LVHRETQW	HHVNWYKR	FHMAIGAR		GAQYMMGQ	FGVWKAIL	EMVHYQIN			WKIMYIRF	MFVKISTT		NLYALXXX	KVMYWHFX	GDQRYYVM			XXXDPGSF	PVSARINT		GYAQNKHA	GPFHIVKW	GPTVNKQL						WHNFHMAI	PVSQVLHX	IKVYDWAF		RGLYFITH	KRISQWMW	GHEMNLQX			XVMFLREK	QMIRWHFS
LYRMIRQE	HIVKWASX	FIENMTLG		GDIMEMLY	FHIVKWAS	EQEYFRMI			WLIFVSNA	MHRNWRAQ		NQIRYRWA	LAGKRRDW	GHGYHQXX			XXXKSHTN	QEYFRMIR		HDVQVMLE	GPKYEHSS	GRDTMFIX						WKIMYIRF	PYQDAXXX	IQNLPXXX		RISQWMWE	KVMYWHFX	GHMYNXXX			XXYWMSTH	RMIRWAVL
MANFLRGP	HLFNAMTW	FKHDVQVM		GDIQFATA	FHWRIMQG	EQTHNYRP			WLMMHFQE	MKWTRVLF		QHRLFTYF	LAIQAVXX	GHMYNXXX			XXXNLSED	QFVTYKMD		HKMETNIT	GPTVNKQL	GRGHEMNL						WLMMHFQE	QMIKSKED	ITREWLHP		RMIRWAVL	KVNFQQHI	GHVKLFRF			YKRFMAHW	RRVYLTSP
MFVKISTT	HMIALYWG	FLVRTWKM		GHEMNLQX	FIDLRWMA	ERLFFWAX			WLNHYHRK	MQGKKAPX		QMIKSKED	LAMYSFTP	GHVKLFRF			XXYWMSTH	QNSDPKAG		HNLFRLQD	GRDLHTVT	GRSANAFQ						WLNHYHRK	QMIRWHFS	IWQKGALH		RRVYLTSP	KYIWYVQT	GHVNSTQX			YPLKFTKV	RVGKWSYR
MHRNWRAQ	HNFHMAIG	FMAFMKWH		GHGYHQXX	FIENMTLG	ETVYADSS			WRIMQGKK	MRQQYLNT		QMIRWHFS	LFTYFRAW	GHVNSTQX			YGVKFRXX	QTRDQNKV		HRRVYLTS	GRDTMFIX	GRSVPQWH						WPSMNKVG	QNKHAXXX	KILMFYWH		RVGKWSYR	LAGKRRDW	GIKMWQSM			YPMFVKIS	RVIFFRLN
MKWTRVLF	HPFKVHXX	FNEYAMWR		GHMYNXXX	FLVRTWKM	EWELDTQK			WYRKHSHQ	MWSLYRMI		QNKHAXXX	LIAKWVGF	GHWLMMHF			YKRFMAHW	QWSKINGX		HTNDLPLI	GRSANAFQ	GSQVFSWL						WSLYRMIR	QWSKINGX	KIMYIRFN		SYEKQRFH	LAMYSFTP	GLYFRYEI			YYKRFMAH	SMQFNVKS
MQGHVNST	HRLFTYFR	FNLYALXX		GHVKLFRF	FMAFMKWH	EWLHPFKV			XAVRAVEG	NDVDGGXX		QWSKINGX	LLTMNEIF	GIKMWQSM				RDMKNLAP		HWLMMHFQ	GRSVPQWH	GSRGLYTX						WYRKHSHQ	RDMKNLAP	KVNFQQHI		TNIRASVP	LDHFYTSQ	GMSFMMXX				TNIRASVP
MRQQYLNT	HRRVYLTS	FNMYGYDL		GHVNSTQX	FMIEMHVI	EYFRMIRW			XGLYFRYE	NFMAFMKW		RDMKNLAP	LMFYWHEF	GILKLMPX				RMENYMVL		IHGFDEAH	GVRNDFTE	GTIFLPVR						XFSLSKMN	RGLYFITH	KVYDWAFR		TSIKVFMP	LIAKWVGF	GPFHIVKW				TSIKVFMP
MVIKKESS	HTNKRISQ	FNVKSHPE		GHWLMMHF	FNIGYKXX	EYMQDXXX			XPWKDMRQ	NGMYWHYL		RMIRWAVL	LMMHFQED	GLTLALWX				RMGKNFXX		IKKESSIX	GWALQHTF	GTQMIEAP						XGMYYKRF	RHVYFAXX	LAIQAVXX		TWMKIFNT	LISVMRXX	GPKYEHSS				TWMKIFNT
NEAHMKTD	HVKLFRFN	FPMHNGRV		GIFYLNGD	FNLYALXX	EYQFVTYK			XVMFLREK	NQIRYRWA		RVGKWSYR	LNHYHRKX	GLYFRYEI				RQQYLNTG		IKVYDWAF	GWLNTSRQ	GWALQHTF						XHNLFRLQ	SMQFNVKS	LLTMNEIF		VGMYWTLN	LMMHFQED	GRDLHTVT				TYKMDXXX
NFMAFMKW	IEHKDQVR	FRIRSGTX		GIKMWQSM	FNMYGYDL	EYSWMNLI			XXADIVAN	PVSQVLHX		RVIFFRLN	LNIHFKFD	GMSFMMXX				RTQKEYQF		IQNLPXXX	GWYLAIQA	GWLNTSRQ						XQMKKTLV	SYEKQRFH	LNIHFKFD		VHMRYINV	LNHYHRKX	GRLWIHKX				VGMYWTLN
NGMYWHYL	IFRKWHXX	FRLQDEQA		GLYFITHX	FPVRPTEX	FAEMWPDH			XXAPSLIA	PYQDAXXX		SMQFNVKS	LNMKWTRV	GRLWIHKX				RVIFFRLN		IVKWASXX	GYAQNKHA	HANENYPY						XSAMMKIG	TRWLIFVS	LNPYMXXX		WAFRIRSG	LNIHFKFD	GVRNDFTE				VHMRYINV
NHTWVVKA	IHGFDEAH	FRMIRWAV		GLYFRYEI	FRSRYHGP	FDEAHNAW			XXHNLFRL	QMIRWHFS		TNIRASVP	LSNWFFEQ	GVKFRXXX				RWLIFVSN		IWQKGALH	GYDLQTAK	HDINMSVS						XXFNEYAM	TVNKQLRX	LSNWFFEQ		WHAMFRKY	LNMKWTRV	GVWKAILS				VKLFRFNW
NQIRYRWA	IKILMFYW	FRSRYHGP		GMSFMMXX	FSIHEWEL	FGIFYLNG			XXMSYQWQ	QMKKTLVM		TSIKVFMP	LVRTWKMP	GVWKAILS				SQVKHMEX		IYRMHVQL	HDVLLRPX	HKMETNIT						XXSAMMKI	TYGRLWIH	LVRTWKMP		WHNFHMAI	LSNWFFEQ	GWYLAIQA				WAFRIRSG
PPNRDEGW	IKMWQSMX	FSIHEWEL		GRDTMFIX	FTGHGYHQ	FGVWKAIL			XXNHQLAW	RFMAHWVG		TVNKQLRX	LYRMIRQE	GWYLAIQA				TQRAGILK		KERLFFWA	HDVQVMLE	HPTFSYMR						XXXNQIIW	VFIDLRWM	MENYMVLT		WHTWMKIF	LYRMIRQE	GYAQNKHA				WAFRSRYH
PVMEFATG	ILMFYWHE	FTQRAGIL		GRGHEMNL	FTNMYXXX	FHDLNPYM			XXXEYPRP	RMIRWAVL		TWMKIFNT	MANFLRGP	HAMFRKYP				TVNKQLRX		KIFNTXXX	HKMETNIT	HRISDAEL						XXXSAMMK	VFILWRTE	MGSRGLYT		WLIFVSNA	MANFLRGP	GYDLQTAK				WHAMFRKY
PVSQVLHX	INSYNMWA	FVTKPNHQ		GRLWIHKX	FVTKPNHQ	FHIVKWAS			XXYWMSTH	RRVYLTSP		TYFRAWXX	MENYMVLT	HESKYFMQ				TWMKIFNT		KPTRWQRX	HMIWAKPG	HTFQESML						XXXVLRFI	WDTKMHAE	MIALYWGR		WLMMHFQE	MFVKISTT	HAMFRKYP				WHTWMKIF
QFVTYKMD	IYRMHVQL	FVTYKMDX		GVWKAILS	FVTYKMDX	FHWRIMQG			YKRFMAHW	RTQKEYQF		TYGRLWIH	MFRKYPIM	HIVKWASX				VHSDAYVT		KQDDLMSE	HNLFRLQD	HTNDLPLI						XXYAFMQV	WHNFHMAI	MIEMHVIX		WLNHYHRK	MHAENIAQ	HDVLLRPX				WKIMYIRF
QHRLFTYF	KERLFFWA	GAQYMMGQ		GWALQHTF	FWIQNLPX	FIDLRWMA			YPLKFTKV	RVGKWSYR		TYKMDXXX	MFVKISTT	HMIALYWG				VKLFRFNW		KVNFQQHI	HQTHVLLX	HTWVVKAX						YFRMIRWA	WHTWMKIF	MIQYLXXX		WLNTSRQA	MLKHWFAW	HDVQVMLE				WLIFVSNA
QMIRWHFS	KILMFYWH	GDIMEMLY		GWLNTSRQ	FYLGRSVP	FIENMTLG			YPMFVKIS	RVIFFRLN		VFIDLRWM	MIALYWGR	HNLFRLQD				VPQLWWXX		KVYDWAFR	HRISDAEL	HYGFVTKP						YGVKFRXX	WLNTSRQA	MIVQHRLF		WPSMNKVG	MRQQYLNT	HHVNWYKR				WLMMHFQE
QNSDPKAG	KIMYIRFN	GDIQFATA		GYAQNKHA	GALHTSMD	FKHDWYGT			YYKRFMAH	SHTNDLPL		VFILWRTE	MIEMHVIX	HRLFTYFR				WAFRSRYH		KYVLGWLN	HTNDLPLI	IDLRWMAY						YMVLTKAA	WNMLKDDM	MRIYIEPE		WRIMQGKK	MVIKKESS	HIVKWASX				WLNHYHRK
QTERHVYF	KRISQWMW	GDQRYYVM		HAMFRKYP	GAQYMMGQ	FLVRTWKM				SMQFNVKS		VHMRYINV	MKWTRVLF	HRRVYLTS				WEIRDMKN		LAIQAVXX	HVQLGGAA	IKKESSIX						YQINQKHX	WPQRRGMX	MSFMMXXX		WTMANFLR	MYFKYIWY	HMIALYWG				WLNTSRQA
QWSKINGX	KVMYWHFX	GEAVMFMS		HDVQVMLE	GDIMEMLY	FMAFMKWH				TNIRASVP		VKLFRFNW	MLKDDMGX	HTNKRISQ				WKIMYIRF		LISVMRXX	IKKESSIX	INDFLVRT							WPSMNKVG	MVHYQINQ		XHNLFRLQ	NAKHYSRQ	HMIWAKPG				WRIMQGKK
RGLYFITH	KVNFQQHI	GFEYVTAS		HHVNWYKR	GDIQFATA	FMIEMHVI				TRLNGEAV		VYADSSEW	MRQQYLNT	HVKLFRFN				WRIMQGKK		LLTMNEIF	IKVYDWAF	IQSTYFHD							WSLYRMIR	MVIKKESS		XHRRVYLT	NEAHMKTD	HNLFRLQD				WTMANFLR
RISQWMWE	KYIWYVQT	GHEMNLQX		HIVKWASX	GEDRNTFY	FNIGYKXX				TSIKVFMP		WAFRSRYH	MWSLYRMI	HWRIMQGK				WSKINGXX		LRWMAYEE	INDFLVRT	IVANFTGH							WTMANFLR	MYWHYLMX		XPSFNMYG	NFMAFMKW	HPFKVHXX				WYRKHSHQ
RMENYMVL	LAGKRRDW	GHMYNXXX		HKMETNIT	GFEYVTAS	FNLYALXX				TWMKIFNT		WHAMFRKY	MYIRFNPF	IFRKWHXX				XALETGTI		LVRTWKMP	IQNLPXXX	IWTHNAGM							XFSLSKMN	NGQMIRWH		XSAMMKIG	NGMYWHYL	HQTHVLLX				XGLYFRYE
RMIRWAVL	LAMYSFTP	GHVKLFRF		HMIALYWG	GHEMNLQX	FNMYGYDL				TYKMDXXX		WHNFHMAI	NFMAFMKW	IFVSNAXX				XASMRIYI		LWERTIVN	IWQKGALH	KIFNTXXX							XGMYYKRF	NHTWVVKA		XSMQFNVK	NGQMIRWH	HRRVYLTS				XGMYYKRF
RRVYLTSP	LDHFYTSQ	GHVNSTQX		HNLFRLQD	GHGYHQXX	FPGQHRIS				VGMYWTLN		WHTWMKIF	NGMYWHYL	IGPTAAYH				XDAWAPMV		LYFRYEIP	IWTHNAGM	KKTLVMYN							XHNLFRLQ	NLYALXXX		XVMFLREK	NHTWVVKA	HTNKRISQ				XHNLFRLQ
RTQKEYQF	LFFWAXXX	GIKMWQSM		HRRVYLTS	GHMYNXXX	FPVRPTEX				VHMRYINV		WKIMYIRF	NGQMIRWH	IKILMFYW				XGLYFRYE		MDQIYKLS	IYKLSNWF	KPTRWQRX							XHRRVYLT	NPIKILMF		XXXYWMST	NPIKILMF	HVKLFRFN				XHRRVYLT
RVGKWSYR	LFNAMTWP	GILKLMPX		HTNDLPLI	GHVKLFRF	FRIHGFDE				VKLFRFNW		WLIFVSNA	NHTWVVKA	IKMWQSMX				XLLQATDE		MGMYASQK	KLSNWFFE	KQDDLMSE							XLAMYSFT	PAFMHXXX		YFRMIRWA	NQIRYRWA	HVQLGGAA				XKVHLPAE
RVIFFRLN	LFTYFRAW	GLYFRYEI		HTNKRISQ	GHVNSTQX	FRSRYHGP				WAFRIRSG		WLMMHFQE	NLYALXXX	IKVYDWAF				XLMNNFAD		MGSRGLYT	KPTRWQRX	KTVFGSDL							XPSFNMYG	PDNFKREX		YGRLWIHK	NTSRQAEX	IEHKDQVR				XNAKHYSR
SQVKHMEX	LIAKWVGF	GMSFMMXX		HVKLFRFN	GHWLMMHF	FSIHEWEL				WAFRSRYH		WLNHYHRK	NPIKILMF	INDFLVRT				XLQGISQE		MHAENIAQ	KQDDLMSE	KVYDWAFR							XQMKKTLV	PFWMLXXX		YPLKFTKV	PVMEFATG	IFRKWHXX				XPWKDMRQ
SYEKQRFH	LISVMRXX	GPFHIVKW		HWLMMHFQ	GIFYLNGD	FSLSKMNP				WHAMFRKY		WPSMNKVG	NQIRYRWA	IQNLPXXX				XPWKDMRQ		MHVQLGGA	KVYDWAFR	LEMHEPLY							XSAMMKIG	PHSKVNFQ		YPMFVKIS	PVSQVLHX	IHGFDEAH				XVMFLREK
TNIRASVP	LKINSYNM	GPKYEHSS		IFRKWHXX	GIKMWQSM	FTGHGYHQ				WHTWMKIF		WRIMQGKK	PTVNKQLR	ITREWLHP				XXADIVAN		MIALYWGR	KYVLGWLN	LLTMNEIF							XSMQFNVK	PKAPESXX		YQINQKHX	QFVTYKMD	IKILMFYW				XXXGSQVF
TSIKVFMP	LMMHFQED	GRDLHTVT		IHGFDEAH	GIQSTYFH	FTNMYXXX				WKIMYIRF		WSLYRMIR	PVSQVLHX	IWQKGALH				XXDAWAPM		MIEMHVIX	LAIQAVXX	LMSEQFTN							XWILAGMQ	PMGMYASQ		YQLLTMNE	QHRLFTYF	IKMWQSMX				XXYAFMQV
TVNKQLRX	LNHYHRKX	GRLWIHKX		IKILMFYW	GLTLALWX	FVTKPNHQ				WLIFVSNA		WYRKHSHQ	PYQDAXXX	IYRMHVQL				XXDDRQKE		MLKHWFAW	LDKLMNWP	LNGEAVMF							XXGPKLTY	PQLWWXXX		YYKRFMAH	QMIRWHFS	IKVYDWAF				XXYWMSTH
TWMKIFNT	LNIHFKFD	GSMGANHT		IKKESSIX	GLYFITHX	FVTYKMDX				WLMMHFQE		XFSLSKMN	QMIKSKED	KFTKVMQQ				XXFDWWGN		MVHYQINQ	LLTMNEIF	LPAEIMQT							XXIEPPWV	PTVNKQLR			QTERHVYF	ITREWLHP				YFRMIRWA
VGMYWTLN	LNMKWTRV	GSWKGVRN		IKMWQSMX	GLYFRYEI	FWIQNLPX				WLNHYHRK		XGLYFRYE	QMIRWHFS	KILMFYWH				XXNLSEDW		MWSLYRMI	LMSEQFTN	LPEIWXXX							XXMYFKYI	PVMEFATG			RGLYFITH	IWQKGALH				YKRFMAHW
VHMRYINV	LSNWFFEQ	GVKFRXXX		IKVYDWAF	GMSFMMXX	FYLGRSVP				WLNTSRQA		XGMYYKRF	QNKHAXXX	KIMYIRFN				XXPDFYLG		NAKHYSRQ	LPSRNGWH	LPSRNGWH							XXSAMMKI	QHRLFTYF			RHVYFAXX	IYKLSNWF				YMVLTKAA
VKLFRFNW	LVHRETQW	GVRNDFTE		IQNLPXXX	GPFHIVKW	GALHTSMD				WRIMQGKK		XHNLFRLQ	QWSKINGX	KVMYWHFX				XXPHWQRV		NGQMIRWH	LQVHMRYI	LQGFWXXX							XXXDPGSF	QMIKSKED			RISQWMWE	IYRMHVQL				YPLKFTKV
WAFRIRSG	LYRMIRQE	GVWKAILS		IVKWASXX	GPKYEHSS	GANHTWVV				WTMANFLR		XPWKDMRQ	RDMKNLAP	KVNFQQHI				XXQGHETR		NHQIWDXX	LRWMAYEE	LRWMAYEE							XXXGSQVF	QNKHAXXX			RMIRWAVL	KERLFFWA				YPMFVKIS
WAFRSRYH	MAIGARSD	GWYLAIQA		IWQKGALH	GPTVNKQL	GAQYMMGQ				WVVKAXXX		XQMKKTLV	RGLYFITH	KVYDWAFR				XXRPVMEF		NHTQQFPX	LVATVYEF	LTEHRSDS							XXXNQIIW	QPVSARIN			RNMEFKHD	KILMFYWH				YYKRFMAH
WHAMFRKY	MANFLRGP	GYAQNKHA		IYRMHVQL	GRDLHTVT	GDIMEMLY				WYRKHSHQ		XSAMMKIG	RHVYFAXX	LAGKRRDW				XXXDPGSF		NMLKDDMG	LVDHIGPT	LVATVYEF							XXXSAMMK	QTHNYRPD			RRVYLTSP	KLSNWFFE
WHNFHMAI	MFVKISTT	GYDLQTAK		KERLFFWA	GRDTMFIX	GDIQFATA				XAVRAVEG		XVMFLREK	RMIRWAVL	LAIQAVXX				XXXKSHTN		NPIKILMF	LVRTWKMP	LVDHIGPT							XXXVLRFI	QWSKINGX			RVGKWSYR	KNQDRMGN
WHTWMKIF	MHAENIAQ	HAMFRKYP		KIFNTXXX	GRLWIHKX	GEDRNTFY				XAWHANEN		XXFNEYAM	RRVYLTSP	LAMYSFTP				XXXMIVQH		NTSRQAEX	LWERTIVN	LYFRYEIP							XXYAFMQV	RDMKNLAP			SHTNDLPL	KRISQWMW
WKIMYIRF	MIALYWGR	HDVLLRPX		KPTRWQRX	GRSANAFQ	GFEYVTAS				XDAWAPMV		XXSAMMKI	RVGKWSYR	LFTYFRAW				XXXMSYQW		PDNFKREX	LYFRYEIP	MGMYASQK							XYAFMQVA	RGLYFITH			SMQFNVKS	KVMYWHFX
WLIFVSNA	MKWTRVLF	HDVQVMLE		KQDDLMSE	GRSVPQWH	GHEMNLQX				XGLYFRYE		XXXNQIIW	RVIFFRLN	LIAKWVGF				XXXNFMAF		PGIHDVLL	MGMYASQK	MGPFHIVK							XYQLLTMN	RHVYFAXX			SRGLYFIT	KVNFQQHI
WLMMHFQE	MLKHWFAW	HHVNWYKR		KRISQWMW	GVRNDFTE	GHGYHQXX				XGMYYKRF		XXXSAMMK	SMQFNVKS	LKINSYNM				XXXNLSED		PHLWERTI	MGSRGLYT	MKELGRSA							YFRMIRWA	RISQWMWE			SYEKQRFH	KYIWYVQT
WLNHYHRK	MQGHVNST	HIVKWASX		KVMYWHFX	GVWKAILS	GHMYNXXX				XHLDWPQK		XXXVLRFI	SYEKQRFH	LLTMNEIF				XXXSFIEP		PKVMYWHF	MIEMHVIX	MLDKLMNW							YGVKFRXX	SLIAKWVG			TERHVYFA	KYVLGWLN
WLNTSRQA	MRQQYLNT	HMIALYWG		KVNFQQHI	GWALQHTF	GHQSNKPP				XHNLFRLQ		XXYAFMQV	TNIRASVP	LMMHFQED				XXXTHATP		PMGMYASQ	MLDKLMNW	MQTTQMXX							YMVLTKAA	SQVLHXXX			TNIRASVP	LAGKRRDW
WPSMNKVG	MVIKKESS	HMIWAKPG		KVYDWAFR	GWLNTSRQ	GHTFQESM				XHRRVYLT		YFRMIRWA	TRWLIFVS	LNHYHRKX				XXXTNMYQ		PTVNKQLR	MLKDDMGX	MSTHLAGK							YQINQKHX	SRGLYFIT			TNKRISQW	LAIQAVXX
WRIMQGKK	MYFKYIWY	HNFHMAIG		KYVLGWLN	GWYLAIQA	GHVKLFRF				XKVHLPAE		YGVKFRXX	TSIKVFMP	LNIHFKFD				XXYWMSTH		PVEYMQDX	MSTHLAGK	MYWHYLMX							YRMHVQLG	SRQWWEMF			TRWLIFVS	LAMYSFTP
WTMANFLR	NAKHYSRQ	HNLFRLQD		LAGKRRDW	GYAQNKHA	GHVNSTQX				XLLQATDE		YMVLTKAA	TVNKQLRX	LNMKWTRV				YASQKHWE		QKQRYFDW	MVHYQINQ	NHQIWDXX								SSADIQGX			TSIKVFMP	LDHFYTSQ
XGLYFRYE	NEAHMKTD	HPFKVHXX		LAIQAVXX	GYDLQTAK	GHWLMMHF				XNAKHYSR		YPLKFTKV	TWMKIFNT	LNPYMXXX				YEKQRFHP		QMIKSKED	MWSLYRMI	NHQLAWGE								SYEKQRFH			TWMKIFNT	LDKLMNWP
XHNLFRLQ	NEIFRKWH	HQTHVLLX		LAMYSFTP	HAMFRKYP	GIFYLNGD				XPWKDMRQ		YPMFVKIS	TYGRLWIH	LSNWFFEQ				YGVKFRXX		QMKKTLVM	MYWHYLMX	NHTQQFPX								THVLLXXX			TYDFWIQN	LIAKWVGF
XHRRVYLT	NFMAFMKW	HRLFTYFR		LIAKWVGF	HDVLLRPX	GIKMWQSM				XVMFLREK		YQINQKHX	TYKMDXXX	LVRTWKMP						RHVYFAXX	NHQIWDXX	NQMRGFXX								TKMHAENI			VDLYDKSX	LISVMRXX
XPSFNMYG	NGMYWHYL	HRRVYLTS		LISVMRXX	HDVQVMLE	GIQSTYFH				XXADIVAN		YYKRFMAH	VFIDLRWM	LYRMIRQE						RNMEFKHD	NHTQQFPX	NYNQMRGF								TRWLIFVS			VFILWRTE	LMMHFQED
XPWKDMRQ	NGQMIRWH	HTNKRISQ		LLTMNEIF	HHVNWYKR	GLTLALWX				XXAPSLIA			VFILWRTE	MANFLRGP						RPVMEFAT	NKVGQAXX	PAFMHXXX								TVNKQLRX			VGMYWTLN	LNHYHRKX
XRMENYMV	NHTWVVKA	HVKLFRFN		LMMHFQED	HIVKWASX	GLYFITHX				XXHNLFRL			VGMYWTLN	MENYMVLT						RWMAYEEP	NMEFKHDW	PDNFKREX								TYGRLWIH			VHMRYINV	LNIHFKFD
XRPVMEFA	NPIKILMF	HVQLGGAA		LNHYHRKX	HKMETNIT	GLYFRYEI				XXINDFLV			VHMRYINV	MFRKYPIM						SKMNPVSQ	NMLKDDMG	PGMRHSAV								VDSHAKRN			VNKQLRXX	LNMKWTRV
XSAMMKIG	NQIRYRWA	IEHKDQVR		LNIHFKFD	HMIALYWG	GMIQYLXX				XXMSYQWQ			VKLFRFNW	MFVKISTT						SKVNFQQH	NQIIWFDY	PIDWHHXX								VFIDLRWM			WAFRIRSG	LNPYMXXX
XSMQFNVK	NTSRQAEX	IFRKWHXX		LNMKWTRV	HMIWAKPG	GMSFMMXX				XXNHQLAW			WAFRSRYH	MGSRGLYT						SLIAKWVG	NQMRGFXX	PLETVYAD								VFILWRTE			WDTKMHAE	LQVHMRYI
XVMFLREK	PHLWERTI	IHGFDEAH		LRWMAYEE	HNLFRLQD	GPFHIVKW				XXXADARK			WDTKMHAE	MIALYWGR						SMQFNVKS	NYNQMRGF	PLISVMRX								VMFMSKXX			WHAMFRKY	LSNWFFEQ
XXDAWAPM	PPNRDEGW	IHGFEYVT		LSNWFFEQ	HQTHVLLX	GPKYEHSS				XXXESIEY			WHAMFRKY	MIEMHVIX						SPLEKMVX	PAFMHXXX	PLKFTKVM								VVQDKHEI			WHNFHMAI	LVRTWKMP
XXHRRVYL	PVMEFATG	IKILMFYW		LVRTWKMP	HRISDAEL	GPTVNKQL				XXXEYPRP			WHNFHMAI	MIQYLXXX						SRGLYFIT	PDFYLGRS	PMLKHWFA								VYADSSEW			WHTWMKIF	LWERTIVN
XXRPVMEF	PVSQVLHX	IKMWQSMX		LWERTIVN	HRRVYLTS	GRDLHTVT				XXXGSQVF			WHTWMKIF	MIVQHRLF						SRQWWEMF	PDNFKREX	PRGHMYNX								WDTKMHAE			WLIFVSNA	LYRMIRQE
XXXDPGSF	QFVTYKMD	IKVYDWAF		LYFRYEIP	HTNDLPLI	GRDTMFIX				XXXSKLGQ			WKIMYIRF	MKWTRVLF						TAFRSRYH	PGIHDVLL	PTFSYMRW								WHNFHMAI			WLMMHFQE	MANFLRGP
XXXGLYFR	QHRLFTYF	INSYNMWA		LYRMIRQE	HTNKRISQ	GRGHEMNL				XXXTNMYQ			WLIFVSNA	MRIYIEPE						TERHVYFA	PHSKVNFQ	PTRLHSXX								WNMLKDDM			WLNHYHRK	MFVKISTT
XXXNLSED	QMIRWHFS	IRWAVLXX		MANFLRGP	HVKLFRFN	GRLWIHKX				XXYAFMQV			WLMMHFQE	MRQQYLNT						TKMHAENI	PKVMYWHF	PTRWQRXX								WPQKPRIG			WLNTSRQA	MGSRGLYT
XXXYWMST	QNSDPKAG	ITREWLHP		MDQIYKLS	HVQLGGAA	GRSANAFQ				XXYWMSTH			WLNHYHRK	MSFMMXXX						TMANFLRG	PLEKMVXX	PTVNKQLR								WPQRRGMX			WNMLKDDM	MHAENIAQ
XXYWMSTH	QTERHVYF	IWQKGALH		MFVKISTT	IFRKWHXX	GRSVPQWH				YFRMIRWA			WLNTSRQA	MVHYQINQ						TNKRISQW	PLISVMRX	PVEYMQDX								WPSMNKVG			WPQKPRIG	MIALYWGR
YFRMIRWA	QWSKINGX	IYKLSNWF		MGMYASQK	IHGFDEAH	GSQVFSWL				YKRFMAHW			WNMLKDDM	MVIKKESS						TRWLIFVS	PLKFTKVM	PVIWTHNA								WSLYRMIR			WPSMNKVG	MLKDDMGX
YGRLWIHK	RGLYFITH	IYRMHVQL		MGSRGLYT	IKILMFYW	GSRGLYTX				YMVLTKAA			WPQRRGMX	MWSLYRMI						TYDFWIQN	PMGMYASQ	PWNMLKDD								WYLAIQAV			WRIMQGKK	MLKHWFAW
YGVKFRXX	RHVYFAXX	KERLFFWA		MHAENIAQ	IKKESSIX	GTIFLPVR				YPLKFTKV			WPSMNKVG	MYWHYLMX						TYGRLWIH	PQVDLYDK	PYQDAXXX								XELFDNRV			WTMANFLR	MRQQYLNT
YKRFMAHW	RISQWMWE	KILMFYWH		MHVQLGGA	IKMWQSMX	GTQMIEAP				YPMFVKIS			WRIMQGKK	NDVDGGXX						VASHRMGK	PRGHMYNX	QGPFWMLX								XFSLSKMN			WYRKHSHQ	MVHYQINQ
YPLKFTKV	RMENYMVL	KIMYIRFN		MIALYWGR	IKVYDWAF	GVRNDFTE				YYKRFMAH			WSLYRMIR	NFMAFMKW						VDLYDKSX	PSMNKVGQ	QKERLFFW								XLAMYSFT			XAVRAVEG	MVIKKESS
YPMFVKIS	RMIRWAVL	KLSNWFFE		MIEMHVIX	INDFLVRT	GVWKAILS							WTMANFLR	NGMYWHYL						VDSHAKRN	PTRLHSXX	QKQRYFDW								XNFMAFMK			XEMKELGR	MYFKYIWY
YQINQKHX	RNMEFKHD	KNQDRMGN		MLKHWFAW	IQNLPXXX	GWALQHTF							WYRKHSHQ	NGQMIRWH						VFILWRTE	PTRWQRXX	QLIEYLDX								XNNFVKAG			XFSLSKMN	NAGMSFMM
YQLLTMNE	RRVYLTSP	KRISQWMW		MRQQYLNT	IWQKGALH	GWLNTSRQ							XFSLSKMN	NHTWVVKA						VKWASXXX	PTVNKQLR	QMIEAPLH								XPSFNMYG			XHNLFRLQ	NAKHYSRQ
YYKRFMAH	RTQKEYQF	KVMYWHFX		MVHYQINQ	IWTHNAGM	GWYLAIQA							XGLYFRYE	NLYALXXX						VRRMNXXX	PVEYMQDX	QMKKTLVM								XQEGHQSN			XHRRVYLT	NEAHMKTD
	RVGKWSYR	KVNFQQHI		MVIKKESS	IYKLSNWF	GYAQNKHA							XGMYYKRF	NPIKILMF						VYADSSEW	PWNMLKDD	QNALDASH								XQMKKTLV			XLAMYSFT	NFMAFMKW
	RVIFFRLN	KYIWYVQT		MWSLYRMI	IYRMHVQL	GYDLQTAK							XHNLFRLQ	NQIRYRWA						WDTKMHAE	PYQDAXXX	QNEAHMKT								XSAMMKIG			XNMRPFKH	NGMYWHYL
	SHTNDLPL	KYVLGWLN		NAKHYSRQ	KERLFFWA	HAMFRKYP							XHRRVYLT	PAFMHXXX						WNMLKDDM	QEHYNAPD	QPVSARIN								XSMQFNVK			XPSFNMYG	NGQMIRWH
	SMQFNVKS	LAGKRRDW		NEAHMKTD	KILMFYWH	HANENYPY							XLAMYSFT	PDNFKREX						WNSEDILT	QKGALHTS	QRYYVMNE								XVSPAPTY			XRNMEFKH	NHTWVVKA
	SQVKHMEX	LAIQAVXX		NFMAFMKW	KLSNWFFE	HDINMSVS							XPSFNMYG	PFWMLXXX						WPMGMYAS	QKQRYFDW	QVDLYDKS								XWILAGMQ			XSAMMKIG	NITREWLH
	SRGLYFIT	LAMYSFTP		NGMYWHYL	KPTRWQRX	HDVLLRPX							XPWKDMRQ	PHSKVNFQ						WPQKPRIG	QLIEYLDX	QVKHMEXX								XXGPKLTY			XSMQFNVK	NMEFKHDW
	SYEKQRFH	LDHFYTSQ		NGQMIRWH	KQDDLMSE	HDVQVMLE							XQMKKTLV	PKAPESXX						WSLYRMIR	QMIKSKED	QWMWEIRX								XXIEPPWV			XVMFLREK	NMLKDDMG
	TERHVYFA	LDKLMNWP		NHQIWDXX	KRISQWMW	HHVNWYKR							XSAMMKIG	PMGMYASQ						WTWYGVKF	QMKKTLVM	RETQWSKI								XXKSHTND			XXMYFKYI	NQIIWFDY
	TNIRASVP	LFNAMTWP		NHTQQFPX	KVMYWHFX	HIVKWASX							XSMQFNVK	PQLWWXXX						WYRKHSHQ	QRYYVMNE	RFIENMTL								XXMYFKYI			XXXYWMST	NQIRYRWA
	TNKRISQW	LFTYFRAW		NHTWVVKA	KVNFQQHI	HKMETNIT							XVMFLREK	PTVNKQLR						XAVRAVEG	QVDLYDKS	RNGWHHNP								XXSAMMKI			YAFMQVAI	NTSRQAEX
	TRWLIFVS	LIAKWVGF		NMLKDDMG	KVYDWAFR	HMIALYWG							XWILAGMQ	PVMEFATG						XELFDNRV	RFIENMTL	RNTFYXXX								XXSFIEPD			YFRMIRWA	PGIHDVLL
	TSIKVFMP	LISVMRXX		NPIKILMF	KYIWYVQT	HMIWAKPG							XXGPKLTY	PVSQVLHX						XEMKELGR	RNGWHHNP	RSAFAEMW								XXWWYHYG			YGRLWIHK	PHLWERTI
	TVNKQLRX	LKINSYNM		NQIRYRWA	KYVLGWLN	HNLFRLQD							XXIEPPWV	PYQDAXXX						XFSLSKMN	RNTFYXXX	RSPLEKMV								XXXAKGMG			YPLKFTKV	PHSKVNFQ
	TWMKIFNT	LMMHFQED		NTSRQAEX	LAGKRRDW	HPFKVHXX							XXMYFKYI	QHRLFTYF						XHAWFSVI	RPVMEFAT	RWMAYEEP								XXXDPGSF			YPMFVKIS	PKVMYWHF
	TYDFWIQN	LNHYHRKX		PDNFKREX	LAIQAVXX	HPTFSYMR							XXSAMMKI	QMIKSKED						XLAMYSFT	RQQYLNTG	SEQFTNMY								XXXHEQEY			YQINQKHX	PLEKMVXX
	VDLYDKSX	LNIHFKFD		PGIHDVLL	LAMYSFTP	HQTHVLLX							XXXDPGSF	QMIRWHFS						XMRAYKEQ	RSPLEKMV	SHQTHVLL								XXXLPNGQ			YRMHVQLG	PMGMYASQ
	VFILWRTE	LNMKWTRV		PHLWERTI	LDHFYTSQ	HRISDAEL							XXXGSQVF	QNKHAXXX						XNMRPFKH	RWMAYEEP	SKVNFQQH								XXXNQIIW			YVLGWLNT	PQVDLYDK
	VGMYWTLN	LNPYMXXX		PKVMYWHF	LDKLMNWP	HRRVYLTS							XXXNQIIW	QPVSARIN						XNNFVKAG	SHQTHVLL	SLSKMNPV								XXXPETGH			YYKRFMAH	PSMNKVGQ
	VHMRYINV	LQDEQATV		PMGMYASQ	LIAKWVGF	HTFQESML							XXXSAMMK	QTHNYRPD						XPDFYLGR	SKMNPVSQ	SMNKVGQA								XXXRLVHR				PVMEFATG
	VHSDAYVT	LQVHMRYI		PTVNKQLR	LISVMRXX	HTNDLPLI							XXXVLRFI	QWSKINGX						XQMKKTLV	SKVNFQQH	SRQAEXXX								XXXSAMMK				PVSQVLHX
	VKLFRFNW	LSNWFFEQ		PVEYMQDX	LLTMNEIF	HTNKRISQ							XXYAFMQV	RDMKNLAP						XREANYHE	SLIAKWVG	SRQWWEMF								XXXVLRFI				QHRLFTYF
	VNKQLRXX	LVHRETQW		PVMEFATG	LMMHFQED	HTWVVKAX							XXYWMSTH	RGLYFITH						XRNMEFKH	SLSKMNPV	SSADIQGX								XXXYWMST				QKGALHTS
	WAFRIRSG	LVRTWKMP		PVSQVLHX	LMSEQFTN	HVKLFRFN							XYAFMQVA	RHVYFAXX						XWILAGMQ	SMNKVGQA	TAFRSRYH								XYAFMQVA				QMIKSKED
	WAFRSRYH	LWERTIVN		QFVTYKMD	LNHYHRKX	HVQLGGAA							XYQLLTMN	RISQWMWE						XXEAWMTF	SPLEKMVX	TFQESMLD								XYQLLTMN				QMIRWHFS
	WDTKMHAE	LYRMIRQE		QHRLFTYF	LNIHFKFD	HYGFVTKP							YFRMIRWA	RMIRWAVL						XXLAMYSF	SRGLYTXX	TGHWLMMH								YDFWIQNL				QTERHVYF
	WEIRDMKN	MAIGARSD		QKQRYFDW	LNMKWTRV	IDLRWMAY							YGVKFRXX	RRVYLTSP						XXMYFKYI	SRQWWEMF	TKLDELQF								YGVKFRXX				RGLYFITH
	WHAMFRKY	MANFLRGP		QMIKSKED	LPSRNGWH	IEHKDQVR							YKRFMAHW	RVGKWSYR						XXNHQLAW	TAFRSRYH	TKMHAENI								YNQMRGFX				RHVYFAXX
	WHNFHMAI	MENYMVLT		QMIRWHFS	LQVHMRYI	IFRKWHXX							YMVLTKAA	RVIFFRLN						XXXMGNNG	THVLLXXX	TLKGEHXX								YQINQKHX				RISQWMWE
	WHTWMKIF	MFLREKQY		QMKKTLVM	LRWMAYEE	IHGFDEAH							YPLKFTKV	SLIAKWVG						XXXNDNTI	TKMHAENI	TMANFLRG								YRMHVQLG				RMIRWAVL
	WKIMYIRF	MFVKISTT		QTERHVYF	LSNWFFEQ	IKILMFYW							YPMFVKIS	SMQFNVKS						XXXPDFYL	TLKGEHXX	TRDQNKVG								YVTASRGX				RNMEFKHD
	WLIFVSNA	MGSRGLYT		RGLYFITH	LVATVYEF	IKKESSIX							YQINQKHX	SQVLHXXX						XXXPKDRW	TMANFLRG	TREWLHPF												RPVMEFAT
	WLMMHFQE	MHAENIAQ		RHVYFAXX	LVDHIGPT	IKMWQSMX							YRMHVQLG	SRGLYFIT						XXXVLRFI	TNMYQAGD	TVTAESLM												RRVYLTSP
	WLNHYHRK	MHRNWRAQ		RISQWMWE	LVRTWKMP	IKVYDWAF							YYKRFMAH	SRQWWEMF						XXXVYHKW	TREWLHPF	VKNQDRMG												RVGKWSYR
	WLNTSRQA	MIALYWGR		RMIRWAVL	LWERTIVN	INDFLVRT								SSADIQGX						XYAFMQVA	TSNLQADW	VKWASXXX												SHTNDLPL
	WNMLKDDM	MIEMHVIX		RNMEFKHD	LYFRYEIP	IQSTYFHD								SYEKQRFH						XYQLLTMN	TVTAESLM	VNIFEIHG												SKMNPVSQ
	WPQKPRIG	MIGHVKLF		RPVMEFAT	LYRMIRQE	ITREWLHP								THVLLXXX						YRKHSHQL	TYGRLWIH	VPQWHEXX												SLIAKWVG
	WPSMNKVG	MKIGEVAR		RRVYLTSP	MANFLRGP	IVANFTGH								TKMHAENI						YRMHVQLG	VASHRMGK	VRRMNXXX												SMQFNVKS
	WRIMQGKK	MKNLAPAN		RVGKWSYR	MFVKISTT	IWQKGALH								TNIRASVP						YWDHKFEM	VDSHAKRN	VWKAILSQ												SPLEKMVX
	WTMANFLR	MKTDWWAY		RWMAYEEP	MGMYASQK	IWTHNAGM								TRWLIFVS							VIKKESSI	WFQHNPKT												SQEHYNAP
	WYRKHSHQ	MKWTRVLF		SKMNPVSQ	MGSRGLYT	IYKLSNWF								TSIKVFMP							VKWASXXX	WGNRSPLE												SRGLYFIT
	XAVRAVEG	MLKDDMGX		SKVNFQQH	MHAENIAQ	IYRMHVQL								TVNKQLRX							VNIFEIHG	WHANENYP												SRGLYTXX
	XAWHANEN	MLKHWFAW		SLIAKWVG	MIEMHVIX	KERLFFWA								TWMKIFNT							VNWYKRAP	WNSEDILT												SYEKQRFH
	XEMKELGR	MQGHVNST		SMQFNVKS	MLDKLMNW	KIFNTXXX								TYGRLWIH							VRRMNXXX	WPVEYMQD												TERHVYFA
	XFSLSKMN	MRQQYLNT		SPLEKMVX	MLKDDMGX	KILMFYWH								TYKMDXXX							VWKAILSQ	WSLYRMIR												THVLLXXX
	XGLYFRYE	MVHYQINQ		SRGLYFIT	MLKHWFAW	KKTLVMYN								VDSHAKRN							VYADSSEW	WTWYGVKF												TNIRASVP
	XHNLFRLQ	MVIKKESS		SRQWWEMF	MRQQYLNT	KLSNWFFE								VFIDLRWM							WFQHNPKT	WVQMIKSK												TNKRISQW
	XHRRVYLT	MYFKYIWY		SYEKQRFH	MSTHLAGK	KNQDRMGN								VFILWRTE							WGNRSPLE	WYVQTADD												TNMYQAGD
	XLAMYSFT	NAGMSFMM		TAFRSRYH	MVHYQINQ	KPTRWQRX								VGMYWTLN							WHANENYP	XDELWVQM												TRWLIFVS
	XNMRPFKH	NAKHYSRQ		TERHVYFA	MVIKKESS	KQDDLMSE								VHMRYINV							WNSEDILT	XDKQFTKG												TSIKVFMP
	XPSFNMYG	NDFLVRTW		TKMHAENI	MWSLYRMI	KRISQWMW								VKLFRFNW							WPMGMYAS	XEAWMTFI												TSNLQADW
	XPWKDMRQ	NDVDGGXX		TMANFLRG	MYFKYIWY	KTVFGSDL								VMFMSKXX							WPVEYMQD	XELFDNRV												TYDFWIQN
	XRMENYMV	NEAHMKTD		TNIRASVP	MYWHYLMX	KVMYWHFX								VVQDKHEI							WSLYRMIR	XEPLDMQK												TYGRLWIH
	XRNMEFKH	NEIFRKWH		TNKRISQW	NAKHYSRQ	KVNFQQHI								VYADSSEW							WTWYGVKF	XGSQVFSW												VASHRMGK
	XSAMMKIG	NFMAFMKW		TRWLIFVS	NEAHMKTD	KVYDWAFR								WAFRIRSG							WVQMIKSK	XGWKTMAD												VDLYDKSX
	XSMQFNVK	NGMYWHYL		TSIKVFMP	NFMAFMKW	KYIWYVQT								WAFRSRYH							WYLAIQAV	XHAWFSVI												VDSHAKRN
	XVMFLREK	NGQMIRWH		TWMKIFNT	NGMYWHYL	KYVLGWLN								WDTKMHAE							WYVQTADD	XLVATVYE												VFILWRTE
	XVYHKWDT	NHTWVVKA		TYDFWIQN	NGQMIRWH	LAGKRRDW								WHAMFRKY							XAGSWKGV	XMYFKYIW												VGMYWTLN
	XXDAWAPM	NITREWLH		TYGRLWIH	NHQIWDXX	LAIQAVXX								WHNFHMAI							XDELWVQM	XNDNTIVY												VHMRYINV
	XXFDWWGN	NMEFKHDW		VASHRMGK	NHTQQFPX	LAMYSFTP								WHTWMKIF							XENFPHLW	XNNFVKAG												VIKKESSI
	XXGRDLHT	NMLKDDMG		VDLYDKSX	NHTWVVKA	LDHFYTSQ								WKIMYIRF							XEPLDMQK	XPDFYLGR												VNKQLRXX
	XXMYFKYI	NQIIWFDY		VDSHAKRN	NKVGQAXX	LDKLMNWP								WLIFVSNA							XFLKAHSD	XQEGHQSN												VNWYKRAP
	XXPDFYLG	NQIRYRWA		VFILWRTE	NMEFKHDW	LEMHEPLY								WLMMHFQE							XHAWFSVI	XQGHETRW												VYADSSEW
	XXRPVMEF	NTSRQAEX		VGMYWTLN	NMLKDDMG	LIAKWVGF								WLNHYHRK							XKVHLPAE	XQLEMHEP												WAFRIRSG
	XXXDPGSF	PFKHDVQV		VHMRYINV	NPIKILMF	LISVMRXX								WLNTSRQA							XLVATVYE	XQMKKTLV												WDTKMHAE
	XXXKSHTN	PGIHDVLL		VKWASXXX	NQIIWFDY	LLTMNEIF								WNMLKDDM							XMRAYKEQ	XTNMYQAG												WHAMFRKY
	XXXNLSED	PHLWERTI		VRRMNXXX	NQIRYRWA	LMMHFQED								WPQKPRIG							XMYFKYIW	XVLRFIEN												WHNFHMAI
	XXXYWMST	PHSKVNFQ		VYADSSEW	NQMRGFXX	LMSEQFTN								WPQRRGMX							XNNFVKAG	XWLAKEDQ												WHTWMKIF
	XXYWMSTH	PKVMYWHF		WAFRIRSG	NTSRQAEX	LNGEAVMF								WPSMNKVG							XPDFYLGR	XXMLDKLM												WLIFVSNA
	YAFMQVAI	PLEKMVXX		WDTKMHAE	NYNQMRGF	LNHYHRKX								WRIMQGKK							XQEGHQSN	XXQLEMHE												WLMMHFQE
	YFRMIRWA	PMGMYASQ		WHAMFRKY	PAFMHXXX	LNIHFKFD								WSLYRMIR							XQLEMHEP	XXWFQHNP												WLNHYHRK
	YGRLWIHK	PPNRDEGW		WHNFHMAI	PDFYLGRS	LNMKWTRV								WTMANFLR							XQMKKTLV	XXWLAKED												WLNTSRQA
	YGVKFRXX	PQVDLYDK		WHTWMKIF	PDNFKREX	LNPYMXXX								WYLAIQAV							XREANYHE	XXXGPKLT												WNMLKDDM
	YKRFMAHW	PSMNKVGQ		WLIFVSNA	PGIHDVLL	LPAEIMQT								WYRKHSHQ							XVLRFIEN	XXXGSQVF												WPMGMYAS
	YPLKFTKV	PVMEFATG		WLMMHFQE	PHSKVNFQ	LPEIWXXX								XELFDNRV							XWILAGMQ	XXXIKVYD												WPQKPRIG
	YPMFVKIS	PVSARINT		WLNHYHRK	PKVMYWHF	LPSRNGWH								XFSLSKMN							XXEAWMTF	XXXLDGYW												WPSMNKVG
	YQINQKHX	PVSQVLHX		WLNTSRQA	PLEKMVXX	LQGFWXXX								XGLYFRYE							XXRKWQSP	XXXLVATV												WTMANFLR
	YRMHVQLG	QEYFRMIR		WNMLKDDM	PLISVMRX	LQVHMRYI								XGMYYKRF							XXWLAKED	XXXMGNNG												WYLAIQAV
	YVLGWLNT	QFVTYKMD		WNSEDILT	PLKFTKVM	LRWMAYEE								XHNLFRLQ							XXXGSQVF	XXXMMVDQ												WYRKHSHQ
	YYKRFMAH	QHRLFTYF		WPMGMYAS	PMGMYASQ	LSNWFFEQ								XHRRVYLT							XXXLVATV	XXXPKDRW												XAGSWKGV
		QKGALHTS		WPQKPRIG	PQVDLYDK	LTEHRSDS								XKVHLPAE							XXXVLRFI	XXXRLVHR												XAVRAVEG
		QMIKSKED		WPSMNKVG	PRGHMYNX	LVATVYEF								XLAMYSFT							XXXVYHKW	XXXTEIWE												XAWHANEN
		QMIRWHFS		WRIMQGKK	PSMNKVGQ	LVDHIGPT								XNAKHYSR							XYAFMQVA	XXXVDYIE												XEMKELGR
		QNSDPKAG		WSLYRMIR	PTRLHSXX	LVRTWKMP								XNFMAFMK							XYQLLTMN	XXXVLRFI												XENFPHLW
		QTERHVYF		WTMANFLR	PTRWQRXX	LWERTIVN								XNNFVKAG							YAQNKHAX	XXXVYHKW												XFLKAHSD
		QTRDQNKV		WTWYGVKF	PTVNKQLR	LYFRYEIP								XPSFNMYG							YDFWIQNL	XYAFMQVA												XFSLSKMN
		QWSKINGX		WYRKHSHQ	PVEYMQDX	LYRMIRQE								XPWKDMRQ							YNQMRGFX	YAQNKHAX												XGIQSTYF
		RDMKNLAP		XAVRAVEG	PVMEFATG	MANFLRGP								XQEGHQSN							YQLLTMNE	YDFWIQNL												XHNLFRLQ
		RGLYFITH		XELFDNRV	PVSQVLHX	MFVKISTT								XQMKKTLV							YRKHSHQL	YHKWDTQD												XHRRVYLT
		RHVYFAXX		XEMKELGR	PWNMLKDD	MGMYASQK								XSAMMKIG							YTLKGEHX	YKEQTNGN												XKVHLPAE
		RISQWMWE		XFSLSKMN	PYQDAXXX	MGPFHIVK								XSMQFNVK								YKLSNWFF												XLAMYSFT
		RMENYMVL		XHAWFSVI	QEHYNAPD	MGSRGLYT								XVMFLREK								YNQMRGFX												XMRAYKEQ
		RMGKNFXX		XHNLFRLQ	QFVTYKMD	MHAENIAQ								XVSPAPTY								YTLKGEHX												XNMRPFKH
		RMIRWAVL		XHRRVYLT	QHRLFTYF	MIALYWGR								XWILAGMQ								YTSQIPAX												XPSFNMYG
		RNMEFKHD		XLAMYSFT	QKGALHTS	MKELGRSA								XXGPKLTY								YWDHKFEM												XREANYHE
		RPVMEFAT		XMRAYKEQ	QKQRYFDW	MLDKLMNW								XXIEPPWV																				XRNMEFKH
		RQQYLNTG		XNMRPFKH	QLIEYLDX	MLKDDMGX								XXKSHTND																				XSAMMKIG
		RRVYLTSP		XNNFVKAG	QMIKSKED	MLKHWFAW								XXMYFKYI																				XSMQFNVK
		RTQKEYQF		XPDFYLGR	QMIRWHFS	MQTTQMXX								XXSAMMKI																				XVMFLREK
		RVGKWSYR		XPSFNMYG	QMKKTLVM	MRQQYLNT								XXSFIEPD																				XVYHKWDT
		RVIFFRLN		XQMKKTLV	QRYYVMNE	MSTHLAGK								XXWWYHYG																				XWILAGMQ
		RWLIFVSN		XREANYHE	QTERHVYF	MVHYQINQ								XXXAKGMG																				XXEVDNTK
		SHTNDLPL		XRNMEFKH	QVDLYDKS	MVIKKESS								XXXDPGSF																				XXGRDLHT
		SKMNPVSQ		XSAMMKIG	RFIENMTL	MYFKYIWY								XXXGSQVF																				XXIKVYDW
		SLIAKWVG		XSMQFNVK	RGLYFITH	MYWHYLMX								XXXHEQEY																				XXMYFKYI
		SMQFNVKS		XVMFLREK	RHVYFAXX	NAGMSFMM								XXXLPNGQ																				XXRKWQSP
		SPLEKMVX		XWILAGMQ	RISQWMWE	NAKHYSRQ								XXXNQIIW																				XXXYWMST
		SQEHYNAP		XXEAWMTF	RMIRWAVL	NEAHMKTD								XXXPETGH																				XYQLLTMN
		SQVKHMEX		XXLAMYSF	RNGWHHNP	NFMAFMKW								XXXRLVHR																				YAFMQVAI
		SRGLYFIT		XXMYFKYI	RNMEFKHD	NGMYWHYL								XXXSAMMK																				YFRMIRWA
		SRGLYTXX		XXNHQLAW	RNTFYXXX	NGQMIRWH								XXXVLRFI																				YGRLWIHK
		SYEKQRFH		XXXMGNNG	RPVMEFAT	NHQIWDXX								XXXYWMST																				YKRFMAHW
		TERHVYFA		XXXNDNTI	RQQYLNTG	NHQLAWGE								XXYAFMQV																				YPLKFTKV
		THVLLXXX		XXXPDFYL	RRVYLTSP	NHTQQFPX								XXYWMSTH																				YPMFVKIS
		TNIRASVP		XXXPKDRW	RSPLEKMV	NHTWVVKA								XYAFMQVA																				YQINQKHX
		TNKRISQW		XXXVLRFI	RVGKWSYR	NITREWLH								XYQLLTMN																				YQLLTMNE
		TNMYQAGD		XXXVYHKW	RWMAYEEP	NMEFKHDW								YDFWIQNL																				YRKHSHQL
		TQRAGILK		XXXYWMST	SHQTHVLL	NMLKDDMG								YFRMIRWA																				YRMHVQLG
		TRWLIFVS		XYAFMQVA	SHTNDLPL	NQIIWFDY								YGVKFRXX																				YVLGWLNT
		TSIKVFMP		XYQLLTMN	SKMNPVSQ	NQIRYRWA								YKRFMAHW																				YYKRFMAH
		TSNLQADW		YFRMIRWA	SKVNFQQH	NQMRGFXX								YMVLTKAA
		TVNKQLRX		YGRLWIHK	SLIAKWVG	NTSRQAEX								YNQMRGFX
		TWMKIFNT		YPLKFTKV	SLSKMNPV	NYNQMRGF								YPLKFTKV
		TYDFWIQN		YPMFVKIS	SMNKVGQA	PAFMHXXX								YPMFVKIS
		TYGRLWIH		YQINQKHX	SMQFNVKS	PDNFKREX								YQINQKHX
		VASHRMGK		YQLLTMNE	SPLEKMVX	PGIHDVLL								YRMHVQLG
		VDLYDKSX		YRKHSHQL	SRGLYFIT	PGMRHSAV								YVTASRGX
		VDSHAKRN		YRMHVQLG	SRGLYTXX	PHLWERTI								YYKRFMAH
		VFILWRTE		YWDHKFEM	SRQWWEMF	PHSKVNFQ
		VGMYWTLN		YYKRFMAH	SYEKQRFH	PIDWHHXX
		VHMRYINV			TAFRSRYH	PKVMYWHF
		VHSDAYVT			TERHVYFA	PLEKMVXX
		VIKKESSI			THVLLXXX	PLETVYAD
		VKLFRFNW			TKMHAENI	PLISVMRX
		VNKQLRXX			TLKGEHXX	PLKFTKVM
		VNWYKRAP			TMANFLRG	PMGMYASQ
		VPQLWWXX			TNIRASVP	PMLKHWFA
		VYADSSEW			TNKRISQW	PQVDLYDK
		WAFRIRSG			TNMYQAGD	PRGHMYNX
		WAFRSRYH			TREWLHPF	PSMNKVGQ
		WDTKMHAE			TRWLIFVS	PTFSYMRW
		WEIRDMKN			TSIKVFMP	PTRLHSXX
		WHAMFRKY			TSNLQADW	PTRWQRXX
		WHNFHMAI			TVTAESLM	PTVNKQLR
		WHTWMKIF			TWMKIFNT	PVEYMQDX
		WKIMYIRF			TYDFWIQN	PVIWTHNA
		WLIFVSNA			TYGRLWIH	PVMEFATG
		WLMMHFQE			VASHRMGK	PVSQVLHX
		WLNHYHRK			VDLYDKSX	PWNMLKDD
		WLNTSRQA			VDSHAKRN	PYQDAXXX
		WNMLKDDM			VFILWRTE	QGPFWMLX
		WPMGMYAS			VGMYWTLN	QHRLFTYF
		WPQKPRIG			VHMRYINV	QKERLFFW
		WPSMNKVG			VIKKESSI	QKGALHTS
		WRIMQGKK			VKWASXXX	QKQRYFDW
		WSKINGXX			VNIFEIHG	QLIEYLDX
		WTMANFLR			VNKQLRXX	QMIEAPLH
		WYLAIQAV			VNWYKRAP	QMIKSKED
		WYRKHSHQ			VRRMNXXX	QMIRWHFS
		XAGSWKGV			VWKAILSQ	QMKKTLVM
		XALETGTI			VYADSSEW	QNALDASH
		XASMRIYI			WAFRIRSG	QNEAHMKT
		XAVRAVEG			WDTKMHAE	QPVSARIN
		XAWHANEN			WFQHNPKT	QRYYVMNE
		XDAWAPMV			WGNRSPLE	QTERHVYF
		XEMKELGR			WHAMFRKY	QVDLYDKS
		XENFPHLW			WHANENYP	QVKHMEXX
		XFLKAHSD			WHNFHMAI	QWMWEIRX
		XFSLSKMN			WHTWMKIF	RETQWSKI
		XGIQSTYF			WLIFVSNA	RFIENMTL
		XGLYFRYE			WLMMHFQE	RGLYFITH
		XHNLFRLQ			WLNHYHRK	RHVYFAXX
		XHRRVYLT			WLNTSRQA	RISQWMWE
		XKVHLPAE			WNMLKDDM	RMIRWAVL
		XLAMYSFT			WNSEDILT	RNGWHHNP
		XLLQATDE			WPMGMYAS	RNMEFKHD
		XLMNNFAD			WPQKPRIG	RNTFYXXX
		XLQGISQE			WPSMNKVG	RPVMEFAT
		XMRAYKEQ			WPVEYMQD	RRVYLTSP
		XNMRPFKH			WRIMQGKK	RSAFAEMW
		XPSFNMYG			WSLYRMIR	RSPLEKMV
		XPWKDMRQ			WTMANFLR	RVGKWSYR
		XREANYHE			WTWYGVKF	RWMAYEEP
		XRNMEFKH			WVQMIKSK	SEQFTNMY
		XSAMMKIG			WYLAIQAV	SHQTHVLL
		XSMQFNVK			WYRKHSHQ	SHTNDLPL
		XVMFLREK			WYVQTADD	SKMNPVSQ
		XVYHKWDT			XAGSWKGV	SKVNFQQH
		XWILAGMQ			XAVRAVEG	SLIAKWVG
		XXADIVAN			XDELWVQM	SLSKMNPV
		XXDAWAPM			XEMKELGR	SMNKVGQA
		XXDDRQKE			XENFPHLW	SMQFNVKS
		XXEVDNTK			XEPLDMQK	SPLEKMVX
		XXFDWWGN			XFLKAHSD	SQEHYNAP
		XXGRDLHT			XFSLSKMN	SRGLYFIT
		XXIKVYDW			XHAWFSVI	SRGLYTXX
		XXMYFKYI			XHNLFRLQ	SRQAEXXX
		XXNLSEDW			XHRRVYLT	SRQWWEMF
		XXPDFYLG			XKVHLPAE	SSADIQGX
		XXPHWQRV			XLAMYSFT	SYEKQRFH
		XXQGHETR			XLVATVYE	TAFRSRYH
		XXRKWQSP			XMRAYKEQ	TERHVYFA
		XXRPVMEF			XMYFKYIW	TFQESMLD
		XXXDPGSF			XNMRPFKH	TGHWLMMH
		XXXKSHTN			XNNFVKAG	THVLLXXX
		XXXMIVQH			XPDFYLGR	TKLDELQF
		XXXMSYQW			XPSFNMYG	TKMHAENI
		XXXNFMAF			XQEGHQSN	TLKGEHXX
		XXXNLSED			XQLEMHEP	TMANFLRG
		XXXSFIEP			XQMKKTLV	TNIRASVP
		XXXTHATP			XREANYHE	TNKRISQW
		XXXTNMYQ			XRNMEFKH	TNMYQAGD
		XXXYWMST			XSAMMKIG	TRDQNKVG
		XXYWMSTH			XSMQFNVK	TREWLHPF
		XYQLLTMN			XVLRFIEN	TRWLIFVS
		YAFMQVAI			XVMFLREK	TSIKVFMP
		YASQKHWE			XWILAGMQ	TSNLQADW
		YEKQRFHP			XXEAWMTF	TVTAESLM
		YFRMIRWA			XXMYFKYI	TYDFWIQN
		YGRLWIHK			XXRKWQSP	TYGRLWIH
		YGVKFRXX			XXWLAKED	VASHRMGK
		YKRFMAHW			XXXGSQVF	VDLYDKSX
		YPLKFTKV			XXXLVATV	VDSHAKRN
		YPMFVKIS			XXXVLRFI	VFILWRTE
		YQINQKHX			XXXVYHKW	VGMYWTLN
		YQLLTMNE			XXXYWMST	VHMRYINV
		YRKHSHQL			XYAFMQVA	VIKKESSI
		YRMHVQLG			XYQLLTMN	VKNQDRMG
		YVLGWLNT			YAFMQVAI	VKWASXXX
		YYKRFMAH			YAQNKHAX	VNIFEIHG
					YDFWIQNL	VNKQLRXX
					YFRMIRWA	VNWYKRAP
					YGRLWIHK	VPQWHEXX
					YNQMRGFX	VRRMNXXX
					YPLKFTKV	VWKAILSQ
					YPMFVKIS	VYADSSEW
					YQINQKHX	WAFRIRSG
					YQLLTMNE	WDTKMHAE
					YRKHSHQL	WFQHNPKT
					YRMHVQLG	WGNRSPLE
					YTLKGEHX	WHAMFRKY
					YVLGWLNT	WHANENYP
					YYKRFMAH	WHNFHMAI
						WHTWMKIF
						WLIFVSNA
						WLMMHFQE
						WLNHYHRK
						WLNTSRQA
						WNMLKDDM
						WNSEDILT
						WPMGMYAS
						WPQKPRIG
						WPSMNKVG
						WPVEYMQD
						WSLYRMIR
						WTMANFLR
						WTWYGVKF
						WVQMIKSK
						WYLAIQAV
						WYRKHSHQ
						WYVQTADD
						XAGSWKGV
						XAVRAVEG
						XAWHANEN
						XDELWVQM
						XDKQFTKG
						XEAWMTFI
						XELFDNRV
						XEMKELGR
						XENFPHLW
						XEPLDMQK
						XFLKAHSD
						XFSLSKMN
						XGIQSTYF
						XGSQVFSW
						XGWKTMAD
						XHAWFSVI
						XHNLFRLQ
						XHRRVYLT
						XKVHLPAE
						XLAMYSFT
						XLVATVYE
						XMRAYKEQ
						XMYFKYIW
						XNDNTIVY
						XNMRPFKH
						XNNFVKAG
						XPDFYLGR
						XPSFNMYG
						XQEGHQSN
						XQGHETRW
						XQLEMHEP
						XQMKKTLV
						XREANYHE
						XRNMEFKH
						XSAMMKIG
						XSMQFNVK
						XTNMYQAG
						XVLRFIEN
						XVMFLREK
						XVYHKWDT
						XWILAGMQ
						XWLAKEDQ
						XXEVDNTK
						XXGRDLHT
						XXIKVYDW
						XXMLDKLM
						XXMYFKYI
						XXQLEMHE
						XXRKWQSP
						XXWFQHNP
						XXWLAKED
						XXXGPKLT
						XXXGSQVF
						XXXIKVYD
						XXXLDGYW
						XXXLVATV
						XXXMGNNG
						XXXMMVDQ
						XXXPKDRW
						XXXRLVHR
						XXXTEIWE
						XXXVDYIE
						XXXVLRFI
						XXXVYHKW
						XXXYWMST
						XYAFMQVA
						XYQLLTMN
						YAFMQVAI
						YAQNKHAX
						YDFWIQNL
						YFRMIRWA
						YGRLWIHK
						YHKWDTQD
						YKEQTNGN
						YKLSNWFF
						YKRFMAHW
						YNQMRGFX
						YPLKFTKV
						YPMFVKIS
						YQINQKHX
						YQLLTMNE
						YRKHSHQL
						YRMHVQLG
						YTLKGEHX
						YTSQIPAX
						YVLGWLNT
						YWDHKFEM
						YYKRFMAH

## Sheet: MSPMS Peptide Report
Search Name:	T20170314-04-05/T20170314-04-05_white_pH55_0015
Search Name:	T20170314-06-07/T20170314-06-07_white_pH55_0060
Search Name:	T20170314-08-09/T20170314-08-09_white_pH55_0240
Search Name:	T20170314-11-12/T20170314-11-12_opaque_pH55_0015
Search Name:	T20170314-13-14/T20170314-13-14_opaque_pH55_0060
Search Name:	T20170314-15-16/T20170314-15-16_opaque_pH55_0240
Search Name:	T20170315-03-04/T20170315-03-04_white_pH74_0015
Search Name:	T20170315-05-06/T20170315-05-06_white_pH74_0060
Search Name:	T20170315-07-08/T20170315-07-08_white_pH74_0240
Search Name:	T20170315-10-11/T20170315-10-11_opaque_pH74_0015
Search Name:	T20170315-12-13/T20170315-12-13_opaque_pH74_0060
Search Name:	T20170315-14-15/T20170315-14-15_opaque_pH74_0240
		T20170314-04-05/T20170314-04-05_white_pH55_0015											T20170314-06-07/T20170314-06-07_white_pH55_0060											T20170314-08-09/T20170314-08-09_white_pH55_0240											T20170314-11-12/T20170314-11-12_opaque_pH55_0015											T20170314-13-14/T20170314-13-14_opaque_pH55_0060
	Acc #	m/z	z	Intensity	Prev AA	DB Peptide	Peptide	Next AA	Fraction	RT	Score	Expect	m/z	z	Intensity	Prev AA	DB Peptide	Peptide	Next AA	Fraction	RT	Score	Expect	m/z	z	Intensity	Prev AA	DB Peptide	Peptide	Next AA	Fraction	RT	Score	Expect	m/z	z	Intensity	Prev AA	DB Peptide	Peptide	Next AA	Fraction	RT	Score	Expect	m/z	z	Intensity	Prev AA
[1]	TDP177
[1]	TDP177
[1]	TDP177
[1]	TDP177
[1]	TDP177
[1]	TDP177																							883.934	2	76420	-	LEYFPIWEVNDDVK	LEYFPIWEVNDDVK	-	T20170314-08	67.645	59.9	7.4e-12
[1]	TDP177
[1]	TDP177
[1]	TDP177
[1]	TDP177
[1]	TDP177
[1]	TDP177
[1]	TDP177
[1]	TDP177																							883.939	2	9200000	-	LEYFPIWEVNDDVK	LEYFPIWEVNDDVK	-	T20170314-08	67.286	50.9	1.1e-11
[1]	TDP177												883.936	2	41408	-	LEYFPIWEVNDDVK	LEYFPIWEVNDDVK	-	T20170314-06	68.082	49.1	1.2e-11
[1]	TDP177
[1]	TDP177
[1]	TDP177												883.939	2	10100000	-	LEYFPIWEVNDDVK	LEYFPIWEVNDDVK	-	T20170314-06	67.347	50	1.8e-11
[1]	TDP177
[1]	TDP177
[1]	TDP177																							883.94	2	8695	-	LEYFPIWEVNDDVK	LEYFPIWEVNDDVK	-	T20170314-08	66.612	45.2	2.4e-10
[1]	TDP177																							883.94	2	8695	-	LEYFPIWEVNDDVK	LEYFPIWEVNDDVK	-	T20170314-08	66.612	45.2	2.4e-10
[1]	TDP177																																													883.936	2	51708	-
[1]	TDP177
[1]	TDP177																							891.934	2	14109	-	LEYFPIWEVNDDVK	LEYFPIW(Oxidation)EVNDDVK	-	T20170314-08	66.558	47.7	2.6e-11
[1]	TDP177												891.934	2	28382	-	LEYFPIWEVNDDVK	LEYFPIW(Oxidation)EVNDDVK	-	T20170314-06	66.757	46.1	2.6e-11
[1]	TDP177
[1]	TDP177
[1]	TDP177																							883.936	2	106264	-	LEYFPIWEVNDDVK	LEYFPIWEVNDDVK	-	T20170314-08	66.925	48.2	2.8e-11
[1]	TDP177																																													883.934	2	32255	-
[1]	TDP177
[1]	TDP177
[1]	TDP177
[1]	TDP177
[1]	TDP177	883.936	2	73164	-	LEYFPIWEVNDDVK	LEYFPIWEVNDDVK	-	T20170314-05	66.859	50.9	3.5e-11
[1]	TDP177												883.934	2	60094	-	LEYFPIWEVNDDVK	LEYFPIWEVNDDVK	-	T20170314-06	67.726	44.4	3.6e-11
[1]	TDP177	891.935	2	14683	-	LEYFPIWEVNDDVK	LEYFPIW(Oxidation)EVNDDVK	-	T20170314-04	64.631	44.8	3.6e-11
[1]	TDP177
[1]	TDP177	883.935	2	46885	-	LEYFPIWEVNDDVK	LEYFPIWEVNDDVK	-	T20170314-04	67.374	51.6	3.6e-11
[1]	TDP177
[1]	TDP177
[1]	TDP177												883.936	2	85815	-	LEYFPIWEVNDDVK	LEYFPIWEVNDDVK	-	T20170314-07	66.821	52.5	4.3e-11
[1]	TDP177
[1]	TDP177	883.937	2	5280000	-	LEYFPIWEVNDDVK	LEYFPIWEVNDDVK	-	T20170314-04	66.985	55.1	5.1e-11
[1]	TDP177	891.933	2	19371	-	LEYFPIWEVNDDVK	LEYFPIW(Oxidation)EVNDDVK	-	T20170314-04	60.976	42.7	5.5e-11
[1]	TDP177																																		883.937	2	5740000	-	LEYFPIWEVNDDVK	LEYFPIWEVNDDVK	-	T20170314-11	67.014	54.6	6e-11
[1]	TDP177																																													883.937	2	4170000	-
[1]	TDP177
[1]	TDP177																																		883.934	2	29335	-	LEYFPIWEVNDDVK	LEYFPIWEVNDDVK	-	T20170314-12	66.777	35.6	1.1e-09
[1]	TDP177																																		883.934	2	29335	-	LEYFPIWEVNDDVK	LEYFPIWEVNDDVK	-	T20170314-12	66.777	35.6	1.1e-09
[1]	TDP177																							883.936	2	34056	-	LEYFPIWEVNDDVK	LEYFPIWEVNDDVK	-	T20170314-08	68.348	53.4	6.4e-11
[1]	TDP177
[1]	TDP177												891.932	2	15316	-	LEYFPIWEVNDDVK	LEYFPIW(Oxidation)EVNDDVK	-	T20170314-06	61.578	36.3	6.8e-11
[1]	TDP177
[1]	TDP177																							883.94	2	5509	-	LEYFPIWEVNDDVK	LEYFPIWEVNDDVK	-	T20170314-08	71.798	39.2	7.4e-11
[1]	TDP177
[1]	TDP177																							891.934	2	19507	-	LEYFPIWEVNDDVK	LEYFPIW(Oxidation)EVNDDVK	-	T20170314-08	67.515	49.4	8.1e-11
[1]	TDP177	883.935	2	27286	-	LEYFPIWEVNDDVK	LEYFPIWEVNDDVK	-	T20170314-04	67.73	50.2	8.9e-11
[1]	TDP177																																		883.934	2	22218	-	LEYFPIWEVNDDVK	LEYFPIWEVNDDVK	-	T20170314-11	67.724	44	1e-10
[1]	TDP177
[1]	TDP177
[1]	TDP177
[1]	TDP177																																													883.934	2	27708	-
[1]	TDP177																																		883.937	2	1260000	-	LEYFPIWEVNDDVK	LEYFPIWEVNDDVK	-	T20170314-11	66.673	53.1	1.2e-10
[1]	TDP177																							883.935	2	35915	-	LEYFPIWEVNDDVK	LEYFPIWEVNDDVK	-	T20170314-08	67.993	47.3	1.2e-10
[1]	TDP177																																													891.932	2	7627	-
[1]	TDP177
[1]	TDP177																																		883.935	2	73547	-	LEYFPIWEVNDDVK	LEYFPIWEVNDDVK	-	T20170314-11	67.364	51.6	1.4e-10
[1]	TDP177
[1]	TDP177
[1]	TDP177
[1]	TDP177
[1]	TDP177
[1]	TDP177	883.936	2	294831	-	LEYFPIWEVNDDVK	LEYFPIWEVNDDVK	-	T20170314-04	66.644	50.7	1.5e-10
[1]	TDP177
[1]	TDP177												883.936	2	3338	-	LEYFPIWEVNDDVK	LEYFPIWEVNDDVK	-	T20170314-06	81.493	38	1.7e-10
[1]	TDP177
[1]	TDP177																							891.932	2	20972	-	LEYFPIWEVNDDVK	LEYFPIW(Oxidation)EVNDDVK	-	T20170314-08	61.009	42.5	1.8e-10
[1]	TDP177																							883.934	2	14624	-	LEYFPIWEVNDDVK	LEYFPIWEVNDDVK	-	T20170314-08	69.14	39.4	2e-10
[1]	TDP177												883.936	2	21491	-	LEYFPIWEVNDDVK	LEYFPIWEVNDDVK	-	T20170314-06	68.447	44.2	2.1e-10
[1]	TDP177
[1]	TDP177
[1]	TDP177
[1]	TDP177																							883.934	2	3646	-	LEYFPIWEVNDDVK	LEYFPIWEVNDDVK	-	T20170314-08	79.674	40.7	2.8e-10
[1]	TDP177
[1]	TDP177												883.937	2	4472	-	LEYFPIWEVNDDVK	LEYFPIWEVNDDVK	-	T20170314-06	82.301	38.8	3e-10
[1]	TDP177																																		891.934	2	20347	-	LEYFPIWEVNDDVK	LEYFPIW(Oxidation)EVNDDVK	-	T20170314-11	64.711	47.3	3.1e-10
[1]	TDP177												883.937	2	4471	-	LEYFPIWEVNDDVK	LEYFPIWEVNDDVK	-	T20170314-06	72.591	36.3	3.2e-10
[1]	TDP177	883.938	2	9007	-	LEYFPIWEVNDDVK	LEYFPIWEVNDDVK	-	T20170314-04	68.81	43.1	3.2e-10
[1]	TDP177																																		891.933	2	8909	-	LEYFPIWEVNDDVK	LEYFPIW(Oxidation)EVNDDVK	-	T20170314-11	66.27	39	3.3e-10
[1]	TDP177
[1]	TDP177
[1]	TDP177
[1]	TDP177																							883.938	2	3818	-	LEYFPIWEVNDDVK	LEYFPIWEVNDDVK	-	T20170314-08	77.39	37.3	3.5e-10
[1]	TDP177																							883.935	2	6461	-	LEYFPIWEVNDDVK	LEYFPIWEVNDDVK	-	T20170314-08	71.444	38.5	3.7e-10
[1]	TDP177
[1]	TDP177												883.936	2	155708	-	LEYFPIWEVNDDVK	LEYFPIWEVNDDVK	-	T20170314-06	66.993	48.8	3.8e-10
[1]	TDP177
[1]	TDP177												891.933	2	54253	-	LEYFPIWEVNDDVK	LEYFPIW(Oxidation)EVNDDVK	-	T20170314-06	67.63	43.1	4e-10
[1]	TDP177																																													883.934	2	13745	-
[1]	TDP177																							883.935	2	4628	-	LEYFPIWEVNDDVK	LEYFPIWEVNDDVK	-	T20170314-08	72.742	37.4	4.2e-10
[1]	TDP177	883.933	2	10417	-	LEYFPIWEVNDDVK	LEYFPIWEVNDDVK	-	T20170314-04	69.149	45.7	4.3e-10
[1]	TDP177	891.935	2	11293	-	LEYFPIWEVNDDVK	LEYFPIW(Oxidation)EVNDDVK	-	T20170314-04	66.279	36.7	4.6e-10
[1]	TDP177
[1]	TDP177
[1]	TDP177	891.934	2	25836	-	LEYFPIWEVNDDVK	LEYFPIW(Oxidation)EVNDDVK	-	T20170314-04	67.199	45.3	4.8e-10
[1]	TDP177												883.936	2	9571	-	LEYFPIWEVNDDVK	LEYFPIWEVNDDVK	-	T20170314-06	69.514	35.4	5.2e-10
[1]	TDP177												883.935	2	22310	-	LEYFPIWEVNDDVK	LEYFPIWEVNDDVK	-	T20170314-06	69.141	40.1	5.2e-10
[1]	TDP177																							883.935	2	2873	-	LEYFPIWEVNDDVK	LEYFPIWEVNDDVK	-	T20170314-08	74.457	43	5.4e-10
[1]	TDP177
[1]	TDP177																							883.937	2	11510	-	LEYFPIWEVNDDVK	LEYFPIWEVNDDVK	-	T20170314-09	66.858	41.9	5.6e-10
[1]	TDP177
[1]	TDP177												891.933	2	16560	-	LEYFPIWEVNDDVK	LEYFPIW(Oxidation)EVNDDVK	-	T20170314-06	61.218	36.9	5.7e-10
[1]	TDP177	883.934	2	2912	-	LEYFPIWEVNDDVK	LEYFPIWEVNDDVK	-	T20170314-04	83.258	39.4	5.7e-10
[1]	TDP177
[1]	TDP177
[1]	TDP177																							883.941	2	1893	-	LEYFPIWEVNDDVK	LEYFPIWEVNDDVK	-	T20170314-08	80.36	44.7	6e-10
[1]	TDP177																																													883.937	2	6084	-
[1]	TDP177
[1]	TDP177	883.936	2	3633	-	LEYFPIWEVNDDVK	LEYFPIWEVNDDVK	-	T20170314-04	71.037	37	6.6e-10
[1]	TDP177
[1]	TDP177																																		891.931	2	21805	-	LEYFPIWEVNDDVK	LEYFPIW(Oxidation)EVNDDVK	-	T20170314-11	67.159	41.9	6.8e-10
[1]	TDP177
[1]	TDP177																							891.934	2	14299	-	LEYFPIWEVNDDVK	LEYFPIW(Oxidation)EVNDDVK	-	T20170314-08	64.856	41.9	7.3e-10
[1]	TDP177
[1]	TDP177
[1]	TDP177																																		883.938	2	13860	-	LEYFPIWEVNDDVK	LEYFPIWEVNDDVK	-	T20170314-11	68.104	45	7.5e-10
[1]	TDP177
[1]	TDP177	883.934	2	2926	-	LEYFPIWEVNDDVK	LEYFPIWEVNDDVK	-	T20170314-04	75.44	37.9	7.6e-10
[1]	TDP177
[1]	TDP177												883.933	2	10249	-	LEYFPIWEVNDDVK	LEYFPIWEVNDDVK	-	T20170314-06	69.855	35.4	7.7e-10
[1]	TDP177
[1]	TDP177																							883.936	2	13188	-	LEYFPIWEVNDDVK	LEYFPIWEVNDDVK	-	T20170314-08	69.493	38.8	8.2e-10
[1]	TDP177
[1]	TDP177												899.929	2	7306	-	LEYFPIWEVNDDVK	LEYFP(Oxidation)IW(Oxidation)EVNDDVK	-	T20170314-06	64.788	39.8	8.7e-10
[1]	TDP177																							883.936	2	18983	-	LEYFPIWEVNDDVK	LEYFPIWEVNDDVK	-	T20170314-08	68.724	37.8	8.9e-10
[1]	TDP177																							883.933	2	6817	-	LEYFPIWEVNDDVK	LEYFPIWEVNDDVK	-	T20170314-08	69.864	32.1	9.4e-10
[1]	TDP177	883.938	2	6929	-	LEYFPIWEVNDDVK	LEYFPIWEVNDDVK	-	T20170314-04	66.291	38.4	1e-09
[1]	TDP177
[1]	TDP177
[1]	TDP177
[1]	TDP177
[1]	TDP177
[1]	TDP177												883.939	2	13670	-	LEYFPIWEVNDDVK	LEYFPIWEVNDDVK	-	T20170314-06	66.672	46.9	1.2e-09
[1]	TDP177
[1]	TDP177												883.937	2	4360	-	LEYFPIWEVNDDVK	LEYFPIWEVNDDVK	-	T20170314-06	81.007	38.1	1.3e-09
[1]	TDP177
[1]	TDP177
[1]	TDP177
[1]	TDP177
[1]	TDP177
[1]	TDP177	883.937	2	17243	-	LEYFPIWEVNDDVK	LEYFPIWEVNDDVK	-	T20170314-04	68.084	44.7	1.5e-09
[1]	TDP177	883.939	2	2757	-	LEYFPIWEVNDDVK	LEYFPIWEVNDDVK	-	T20170314-04	80.376	32.7	1.6e-09
[1]	TDP177																							891.935	2	9736	-	LEYFPIWEVNDDVK	LEYFPIW(Oxidation)EVNDDVK	-	T20170314-08	66.892	31.9	1.6e-09
[1]	TDP177
[1]	TDP177
[1]	TDP177
[1]	TDP177
[1]	TDP177												883.935	2	12517	-	LEYFPIWEVNDDVK	LEYFPIWEVNDDVK	-	T20170314-06	68.807	43.3	1.9e-09
[1]	TDP177
[1]	TDP177	891.933	2	19297	-	LEYFPIWEVNDDVK	LEYFPIW(Oxidation)EVNDDVK	-	T20170314-04	61.343	38.3	2e-09
[1]	TDP177
[1]	TDP177	883.942	2	1844	-	LEYFPIWEVNDDVK	LEYFPIWEVNDDVK	-	T20170314-04	81.13	35.2	2.3e-09
[1]	TDP177																																													891.933	2	12386	-
[1]	TDP177
[1]	TDP177
[1]	TDP177																							899.933	2	22188	-	LEYFPIWEVNDDVK	LEYFP(Oxidation)IW(Oxidation)EVNDDVK	-	T20170314-08	64.719	38.7	2.5e-09
[1]	TDP177																																		883.94	2	3556	-	LEYFPIWEVNDDVK	LEYFPIWEVNDDVK	-	T20170314-11	75.621	33.4	2.6e-09
[1]	TDP177
[1]	TDP177
[1]	TDP177
[1]	TDP177
[1]	TDP177
[1]	TDP177
[1]	TDP177																							883.94	2	7572	-	LEYFPIWEVNDDVK	LEYFPIWEVNDDVK	-	T20170314-08	70.222	32.7	3e-09
[1]	TDP177																							883.934	2	3215	-	LEYFPIWEVNDDVK	LEYFPIWEVNDDVK	-	T20170314-08	81.241	31.5	3e-09
[1]	TDP177
[1]	TDP177												883.936	2	6313	-	LEYFPIWEVNDDVK	LEYFPIWEVNDDVK	-	T20170314-06	71.465	36.4	3.3e-09
[1]	TDP177
[1]	TDP177
[1]	TDP177
[1]	TDP177																							883.934	2	3867	-	LEYFPIWEVNDDVK	LEYFPIWEVNDDVK	-	T20170314-08	82.807	35.8	3.6e-09
[1]	TDP177
[1]	TDP177																							883.938	2	4056	-	LEYFPIWEVNDDVK	LEYFPIWEVNDDVK	-	T20170314-08	76.138	30.3	3.7e-09
[1]	TDP177
[1]	TDP177
[1]	TDP177												883.943	2	3539	-	LEYFPIWEVNDDVK	LEYFPIWEVNDDVK	-	T20170314-06	83.74	31.4	3.9e-09
[1]	TDP177												883.939	2	2725	-	LEYFPIWEVNDDVK	LEYFPIWEVNDDVK	-	T20170314-06	75.796	32.9	3.9e-09
[1]	TDP177
[1]	TDP177
[1]	TDP177
[1]	TDP177
[1]	TDP177												883.939	2	3944	-	LEYFPIWEVNDDVK	LEYFPIWEVNDDVK	-	T20170314-06	82.653	35.9	4.6e-09
[1]	TDP177
[1]	TDP177
[1]	TDP177	883.936	2	16451	-	LEYFPIWEVNDDVK	LEYFPIWEVNDDVK	-	T20170314-04	68.456	22.5	6.8e-08
[1]	TDP177	883.936	2	16451	-	LEYFPIWEVNDDVK	LEYFPIWEVNDDVK	-	T20170314-04	68.456	22.5	6.8e-08
[1]	TDP177
[1]	TDP177																							883.939	2	3032	-	LEYFPIWEVNDDVK	LEYFPIWEVNDDVK	-	T20170314-08	81.603	34.3	5e-09
[1]	TDP177																							883.936	2	7289	-	LEYFPIWEVNDDVK	LEYFPIWEVNDDVK	-	T20170314-08	71.079	34.6	5.6e-09
[1]	TDP177																																		899.929	2	14998	-	LEYFPIWEVNDDVK	LEYFP(Oxidation)IW(Oxidation)EVNDDVK	-	T20170314-11	64.534	36.8	5.7e-09
[1]	TDP177
[1]	TDP177																																		891.93	2	17451	-	LEYFPIWEVNDDVK	LEYFPIW(Oxidation)EVNDDVK	-	T20170314-11	61.05	39.5	6.1e-09
[1]	TDP177																							883.936	2	4022	-	LEYFPIWEVNDDVK	LEYFPIWEVNDDVK	-	T20170314-08	82.43	31.7	6.2e-09
[1]	TDP177	883.94	2	4669	-	LEYFPIWEVNDDVK	LEYFPIWEVNDDVK	-	T20170314-04	69.867	38.2	6.2e-09
[1]	TDP177
[1]	TDP177
[1]	TDP177
[1]	TDP177																							883.936	2	3447	-	LEYFPIWEVNDDVK	LEYFPIWEVNDDVK	-	T20170314-08	76.567	31.1	6.3e-09
[1]	TDP177																																		883.938	2	11084	-	LEYFPIWEVNDDVK	LEYFPIWEVNDDVK	-	T20170314-11	66.318	34.8	6.5e-09
[1]	TDP177
[1]	TDP177
[1]	TDP177																																		883.933	2	2412	-	LEYFPIWEVNDDVK	LEYFPIWEVNDDVK	-	T20170314-11	82.859	33.6	6.9e-09
[1]	TDP177
[1]	TDP177																																		883.937	2	3195	-	LEYFPIWEVNDDVK	LEYFPIWEVNDDVK	-	T20170314-11	78.069	28	7.4e-09
[1]	TDP177
[1]	TDP177	883.936	2	3008	-	LEYFPIWEVNDDVK	LEYFPIWEVNDDVK	-	T20170314-04	77.365	34.2	7.6e-09
[1]	TDP177	883.936	2	2152	-	LEYFPIWEVNDDVK	LEYFPIWEVNDDVK	-	T20170314-04	80.753	31.9	7.7e-09
[1]	TDP177
[1]	TDP177
[1]	TDP177
[1]	TDP177
[1]	TDP177																							883.932	2	4307	-	LEYFPIWEVNDDVK	LEYFPIWEVNDDVK	-	T20170314-08	75.393	30.2	8.7e-09
[1]	TDP177
[1]	TDP177																							883.935	2	13990	-	LEYFPIWEVNDDVK	LEYFPIWEVNDDVK	-	T20170314-09	67.233	31.7	9.1e-09
[1]	TDP177												883.937	2	4867	-	LEYFPIWEVNDDVK	LEYFPIWEVNDDVK	-	T20170314-06	71.89	32.4	9.3e-09
[1]	TDP177	883.935	2	2958	-	LEYFPIWEVNDDVK	LEYFPIWEVNDDVK	-	T20170314-04	74.988	28.9	9.3e-09
[1]	TDP177
[1]	TDP177
[1]	TDP177																																													891.93	2	9013	-
[1]	TDP177
[1]	TDP177
[1]	TDP177																																		883.939	2	4395	-	LEYFPIWEVNDDVK	LEYFPIWEVNDDVK	-	T20170314-11	72.173	36.4	1.1e-08
[1]	TDP177												883.941	2	8811	-	LEYFPIWEVNDDVK	LEYFPIWEVNDDVK	-	T20170314-06	70.217	34.2	1.1e-08
[1]	TDP177
[1]	TDP177
[1]	TDP177
[1]	TDP177																																													899.931	2	13878	-
[1]	TDP177																							883.94	2	4533	-	LEYFPIWEVNDDVK	LEYFPIWEVNDDVK	-	T20170314-08	73.74	29.4	1.2e-08
[1]	TDP177
[1]	TDP177												883.933	2	4887	-	LEYFPIWEVNDDVK	LEYFPIWEVNDDVK	-	T20170314-06	70.984	35.9	1.3e-08
[1]	TDP177	883.936	2	4124	-	LEYFPIWEVNDDVK	LEYFPIWEVNDDVK	-	T20170314-04	82.546	33.1	1.3e-08
[1]	TDP177												883.936	2	3676	-	LEYFPIWEVNDDVK	LEYFPIWEVNDDVK	-	T20170314-06	75.353	31.3	1.3e-08
[1]	TDP177																							883.943	2	3385	-	LEYFPIWEVNDDVK	LEYFPIWEVNDDVK	-	T20170314-08	78.385	37.3	1.3e-08
[1]	TDP177																							891.933	2	25147	-	LEYFPIWEVNDDVK	LEYFPIW(Oxidation)EVNDDVK	-	T20170314-08	61.372	36.6	1.3e-08
[1]	TDP177
[1]	TDP177	883.933	2	4169	-	LEYFPIWEVNDDVK	LEYFPIWEVNDDVK	-	T20170314-04	74.185	31.5	1.4e-08
[1]	TDP177
[1]	TDP177
[1]	TDP177												883.94	2	3072	-	LEYFPIWEVNDDVK	LEYFPIWEVNDDVK	-	T20170314-06	79.408	28.9	1.4e-08
[1]	TDP177																																		883.934	2	2601	-	LEYFPIWEVNDDVK	LEYFPIWEVNDDVK	-	T20170314-11	80.876	29.4	1.4e-08
[1]	TDP177																							883.934	2	4163	-	LEYFPIWEVNDDVK	LEYFPIWEVNDDVK	-	T20170314-08	72.257	32.5	1.4e-08
[1]	TDP177
[1]	TDP177	883.934	2	2952	-	LEYFPIWEVNDDVK	LEYFPIWEVNDDVK	-	T20170314-04	78.176	30	1.5e-08
[1]	TDP177
[1]	TDP177
[1]	TDP177	883.938	2	3079	-	LEYFPIWEVNDDVK	LEYFPIWEVNDDVK	-	T20170314-04	81.601	29.1	1.6e-08
[1]	TDP177												883.939	2	5170	-	LEYFPIWEVNDDVK	LEYFPIWEVNDDVK	-	T20170314-06	72.98	34.3	1.7e-08
[1]	TDP177																																		883.937	2	3426	-	LEYFPIWEVNDDVK	LEYFPIWEVNDDVK	-	T20170314-11	77.348	32.6	1.7e-08
[1]	TDP177
[1]	TDP177
[1]	TDP177
[1]	TDP177																																		883.937	2	9621	-	LEYFPIWEVNDDVK	LEYFPIWEVNDDVK	-	T20170314-11	68.942	32.2	1.8e-08
[1]	TDP177
[1]	TDP177
[1]	TDP177
[1]	TDP177
[1]	TDP177
[1]	TDP177																							883.935	2	7557	-	LEYFPIWEVNDDVK	LEYFPIWEVNDDVK	-	T20170314-08	70.692	31.7	2.1e-08
[1]	TDP177
[1]	TDP177	883.939	2	2440	-	LEYFPIWEVNDDVK	LEYFPIWEVNDDVK	-	T20170314-04	76.021	25.8	2.2e-08
[1]	TDP177																							883.936	2	3185	-	LEYFPIWEVNDDVK	LEYFPIWEVNDDVK	-	T20170314-08	83.245	29.5	2.2e-08
[1]	TDP177
[1]	TDP177																																		883.94	2	2999	-	LEYFPIWEVNDDVK	LEYFPIWEVNDDVK	-	T20170314-11	76.014	28.7	2.4e-08
[1]	TDP177
[1]	TDP177												883.937	2	3607	-	LEYFPIWEVNDDVK	LEYFPIWEVNDDVK	-	T20170314-06	81.948	35.4	2.4e-08
[1]	TDP177												883.94	2	4304	-	LEYFPIWEVNDDVK	LEYFPIWEVNDDVK	-	T20170314-06	77.742	26.3	2.4e-08
[1]	TDP177
[1]	TDP177
[1]	TDP177
[1]	TDP177																							891.935	2	8765	-	LEYFPIWEVNDDVK	LEY(Oxidation)FPIWEVNDDVK	-	T20170314-08	65.339	29.1	2.5e-08
[1]	TDP177
[1]	TDP177
[1]	TDP177
[1]	TDP177
[1]	TDP177
[1]	TDP177																																		883.936	2	3175	-	LEYFPIWEVNDDVK	LEYFPIWEVNDDVK	-	T20170314-11	74.876	30.4	2.8e-08
[1]	TDP177												883.937	2	4260	-	LEYFPIWEVNDDVK	LEYFPIWEVNDDVK	-	T20170314-06	82.999	27.8	2.8e-08
[1]	TDP177
[1]	TDP177																							883.938	2	3375	-	LEYFPIWEVNDDVK	LEYFPIWEVNDDVK	-	T20170314-08	74.855	37.4	2.9e-08
[1]	TDP177																																													891.932	2	15324	-
[1]	TDP177																																		883.936	2	3472	-	LEYFPIWEVNDDVK	LEYFPIWEVNDDVK	-	T20170314-11	72.753	36.9	3e-08
[1]	TDP177
[1]	TDP177												883.938	2	2834	-	LEYFPIWEVNDDVK	LEYFPIWEVNDDVK	-	T20170314-06	79.893	31.2	3.2e-08
[1]	TDP177
[1]	TDP177												883.935	2	5562	-	LEYFPIWEVNDDVK	LEYFPIWEVNDDVK	-	T20170314-06	70.648	26.8	3.3e-08
[1]	TDP177																							883.937	2	3602	-	LEYFPIWEVNDDVK	LEYFPIWEVNDDVK	-	T20170314-08	75.788	31.5	3.4e-08
[1]	TDP177
[1]	TDP177												883.935	2	6495	-	LEYFPIWEVNDDVK	LEYFPIWEVNDDVK	-	T20170314-06	73.339	29.5	3.6e-08
[1]	TDP177
[1]	TDP177	883.936	2	7826	-	LEYFPIWEVNDDVK	LEYFPIWEVNDDVK	-	T20170314-04	69.512	27.7	3.7e-08
[1]	TDP177
[1]	TDP177
[1]	TDP177
[1]	TDP177
[1]	TDP177
[1]	TDP177																																		883.934	2	3584	-	LEYFPIWEVNDDVK	LEYFPIWEVNDDVK	-	T20170314-11	82.434	26.1	4e-08
[1]	TDP177
[1]	TDP177
[1]	TDP177												883.938	2	3345	-	LEYFPIWEVNDDVK	LEYFPIWEVNDDVK	-	T20170314-06	80.58	34.8	4.1e-08
[1]	TDP177																																		883.938	2	4055	-	LEYFPIWEVNDDVK	LEYFPIWEVNDDVK	-	T20170314-11	74.105	29.3	4.1e-08
[1]	TDP177	883.939	2	2545	-	LEYFPIWEVNDDVK	LEYFPIWEVNDDVK	-	T20170314-04	73.32	24.4	4.1e-08
[1]	TDP177
[1]	TDP177																							883.94	2	2915	-	LEYFPIWEVNDDVK	LEYFPIWEVNDDVK	-	T20170314-08	80.736	30.1	4.4e-08
[1]	TDP177												883.939	2	4857	-	LEYFPIWEVNDDVK	LEYFPIWEVNDDVK	-	T20170314-06	72.251	30.7	4.5e-08
[1]	TDP177	883.936	2	3752	-	LEYFPIWEVNDDVK	LEYFPIWEVNDDVK	-	T20170314-04	71.392	25.1	4.8e-08
[1]	TDP177
[1]	TDP177
[1]	TDP177
[1]	TDP177
[1]	TDP177
[1]	TDP177
[1]	TDP177
[1]	TDP177
[1]	TDP177
[1]	TDP177																																		883.938	2	3909	-	LEYFPIWEVNDDVK	LEYFPIWEVNDDVK	-	T20170314-11	78.458	29.2	6.3e-08
[1]	TDP177
[1]	TDP177
[1]	TDP177	883.934	2	4123	-	LEYFPIWEVNDDVK	LEYFPIWEVNDDVK	-	T20170314-04	74.621	27.5	6.8e-08
[1]	TDP177
[1]	TDP177	899.931	2	18587	-	LEYFPIWEVNDDVK	LEYFP(Oxidation)IW(Oxidation)EVNDDVK	-	T20170314-04	64.463	31.9	7.6e-08
[1]	TDP177
[1]	TDP177
[1]	TDP177
[1]	TDP177
[1]	TDP177												883.935	2	2903	-	LEYFPIWEVNDDVK	LEYFPIWEVNDDVK	-	T20170314-06	76.349	35.1	8.8e-08
[1]	TDP177
[1]	TDP177
[1]	TDP177
[1]	TDP177												883.937	2	2828	-	LEYFPIWEVNDDVK	LEYFPIWEVNDDVK	-	T20170314-06	78.186	23.1	9.3e-08
[1]	TDP177																																		883.939	2	2501	-	LEYFPIWEVNDDVK	LEYFPIWEVNDDVK	-	T20170314-11	82.087	28.1	9.6e-08
[1]	TDP177
[1]	TDP177												883.933	2	2948	-	LEYFPIWEVNDDVK	LEYFPIWEVNDDVK	-	T20170314-06	78.549	24.5	1e-07
[1]	TDP177
[1]	TDP177
[1]	TDP177
[1]	TDP177
[1]	TDP177												891.934	2	8710	-	LEYFPIWEVNDDVK	LEYFPIW(Oxidation)EVNDDVK	-	T20170314-06	64.929	28	1.1e-07
[1]	TDP177																							883.937	2	3294	-	LEYFPIWEVNDDVK	LEYFPIWEVNDDVK	-	T20170314-08	80.008	26.5	1.1e-07
[1]	TDP177
[1]	TDP177
[1]	TDP177
[1]	TDP177	883.936	2	4575	-	LEYFPIWEVNDDVK	LEYFPIWEVNDDVK	-	T20170314-04	73.754	29.6	1.3e-07
[1]	TDP177
[1]	TDP177	883.937	2	2523	-	LEYFPIWEVNDDVK	LEYFPIWEVNDDVK	-	T20170314-04	78.956	27	1.4e-07
[1]	TDP177
[1]	TDP177																																		883.939	2	3578	-	LEYFPIWEVNDDVK	LEYFPIWEVNDDVK	-	T20170314-11	71.766	27.4	1.4e-07
[1]	TDP177
[1]	TDP177	883.937	2	3743	-	LEYFPIWEVNDDVK	LEYFPIWEVNDDVK	-	T20170314-04	82.207	26.1	1.5e-07
[1]	TDP177
[1]	TDP177
[1]	TDP177
[1]	TDP177	883.936	2	2865	-	LEYFPIWEVNDDVK	LEYFPIWEVNDDVK	-	T20170314-04	78.533	26.2	1.5e-07
[1]	TDP177																																		883.937	2	3233	-	LEYFPIWEVNDDVK	LEYFPIWEVNDDVK	-	T20170314-11	75.233	25.4	1.5e-07
[1]	TDP177
[1]	TDP177
[1]	TDP177	883.938	2	2970	-	LEYFPIWEVNDDVK	LEYFPIWEVNDDVK	-	T20170314-04	77.013	25.7	1.9e-07
[1]	TDP177	883.937	2	3319	-	LEYFPIWEVNDDVK	LEYFPIWEVNDDVK	-	T20170314-04	71.991	23.9	2.1e-07
[1]	TDP177																							883.939	2	3133	-	LEYFPIWEVNDDVK	LEYFPIWEVNDDVK	-	T20170314-08	78	23.9	2.1e-07
[1]	TDP177
[1]	TDP177	883.936	2	3601	-	LEYFPIWEVNDDVK	LEYFPIWEVNDDVK	-	T20170314-04	72.36	25.4	2.1e-07
[1]	TDP177
[1]	TDP177	883.938	2	3040	-	LEYFPIWEVNDDVK	LEYFPIWEVNDDVK	-	T20170314-04	82.897	28.6	2.1e-07
[1]	TDP177																																		883.939	2	2850	-	LEYFPIWEVNDDVK	LEYFPIWEVNDDVK	-	T20170314-11	73.227	29.1	2.2e-07
[1]	TDP177																																		883.937	2	3328	-	LEYFPIWEVNDDVK	LEYFPIWEVNDDVK	-	T20170314-11	76.949	25.7	2.2e-07
[1]	TDP177
[1]	TDP177																							883.936	2	6057	-	LEYFPIWEVNDDVK	LEYFPIWEVNDDVK	-	T20170314-08	73.343	25.7	2.3e-07
[1]	TDP177
[1]	TDP177	883.938	2	2474	-	LEYFPIWEVNDDVK	LEYFPIWEVNDDVK	-	T20170314-04	79.934	25.7	2.6e-07
[1]	TDP177
[1]	TDP177												883.936	2	5855	-	LEYFPIWEVNDDVK	LEYFPIWEVNDDVK	-	T20170314-06	74.616	24.5	2.9e-07
[1]	TDP177
[1]	TDP177																																		883.936	2	6531	-	LEYFPIWEVNDDVK	LEYFPIWEVNDDVK	-	T20170314-11	70.498	22.8	3.4e-07
[1]	TDP177																																		883.933	2	4231	-	LEYFPIWEVNDDVK	LEYFPIWEVNDDVK	-	T20170314-11	70.979	26.3	3.4e-07
[1]	TDP177
[1]	TDP177																																		883.934	2	2560	-	LEYFPIWEVNDDVK	LEYFPIWEVNDDVK	-	T20170314-11	81.587	21.2	4.1e-07
[1]	TDP177																																		883.936	2	3932	-	LEYFPIWEVNDDVK	LEYFPIWEVNDDVK	-	T20170314-11	71.361	26.8	4.2e-07
[1]	TDP177
[1]	TDP177
[1]	TDP177
[1]	TDP177																							883.934	2	3444	-	LEYFPIWEVNDDVK	LEYFPIWEVNDDVK	-	T20170314-08	77.046	26.5	4.7e-07
[1]	TDP177
[1]	TDP177
[1]	TDP177	883.932	2	5487	-	LEYFPIWEVNDDVK	LEYFPIWEVNDDVK	-	T20170314-04	70.253	25	6e-07
[1]	TDP177																							891.933	2	8135	-	LEYFPIWEVNDDVK	LEYFPIW(Oxidation)EVNDDVK	-	T20170314-08	67.879	28.7	6e-07
[1]	TDP177																							883.937	2	2980	-	LEYFPIWEVNDDVK	LEYFPIWEVNDDVK	-	T20170314-08	79.228	23.8	6.4e-07
[1]	TDP177
[1]	TDP177	883.935	2	4989	-	LEYFPIWEVNDDVK	LEYFPIWEVNDDVK	-	T20170314-04	70.673	21	6.5e-07
[1]	TDP177
[1]	TDP177
[1]	TDP177
[1]	TDP177
[1]	TDP177
[1]	TDP177	883.937	2	3260	-	LEYFPIWEVNDDVK	LEYFPIWEVNDDVK	-	T20170314-04	76.607	20.4	8.5e-07
[1]	TDP177																																		891.933	2	7700	-	LEYFPIWEVNDDVK	LEYFPIW(Oxidation)EVNDDVK	-	T20170314-11	66.649	22.4	9.4e-07
[1]	TDP177																							883.933	2	3904	-	LEYFPIWEVNDDVK	LEYFPIWEVNDDVK	-	T20170314-08	74.085	23.8	1e-06
[1]	TDP177
[1]	TDP177
[1]	TDP177
[1]	TDP177
[1]	TDP177																							891.933	2	4386	-	LEYFPIWEVNDDVK	LEYFPIW(Oxidation)EVNDDVK	-	T20170314-08	66.174	24.1	1.4e-06
[1]	TDP177																																		883.937	2	3027	-	LEYFPIWEVNDDVK	LEYFPIWEVNDDVK	-	T20170314-11	79.141	22.8	1.4e-06
[1]	TDP177
[1]	TDP177												883.936	2	2982	-	LEYFPIWEVNDDVK	LEYFPIWEVNDDVK	-	T20170314-06	74.107	21.1	1.5e-06
[1]	TDP177
[1]	TDP177
[1]	TDP177
[1]	TDP177																							899.931	2	7613	-	LEYFPIWEVNDDVK	LEYFP(Oxidation)IW(Oxidation)EVNDDVK	-	T20170314-08	62.236	27	1.6e-06
[1]	TDP177												891.937	2	2740	-	LEYFPIWEVNDDVK	LEYFPIW(Oxidation)EVNDDVK	-	T20170314-06	66.44	22.8	1.6e-06
[1]	TDP177																																		883.941	2	8612	-	LEYFPIWEVNDDVK	LEYFPIWEVNDDVK	-	T20170314-11	69.527	23.8	1.8e-06
[1]	TDP177
[1]	TDP177
[1]	TDP177
[1]	TDP177
[1]	TDP177
[1]	TDP177
[1]	TDP177
[1]	TDP177	589.627	3	889495	-	LEYFPIWEVNDDVK	LEYFPIWEVNDDVK	-	T20170314-04	66.948	27.8	2.1e-06
[1]	TDP177																																		883.938	2	2051	-	LEYFPIWEVNDDVK	LEYFPIWEVNDDVK	-	T20170314-11	80.186	22.6	2.1e-06
[1]	TDP177
[1]	TDP177
[1]	TDP177
[1]	TDP177
[1]	TDP177																																		883.938	2	2299	-	LEYFPIWEVNDDVK	LEYFPIWEVNDDVK	-	T20170314-11	81.243	21.6	3e-06
[1]	TDP177
[1]	TDP177
[1]	TDP177																																													883.938	2	5545	-
[1]	TDP177												899.931	2	6816	-	LEYFPIWEVNDDVK	LEYFP(Oxidation)IW(Oxidation)EVNDDVK	-	T20170314-06	67.057	20.4	4.3e-06
[1]	TDP177
[1]	TDP177																																		883.932	2	14287	-	LEYFPIWEVNDDVK	LEYFPIWEVNDDVK	-	T20170314-11	68.477	25.2	4.7e-06
[1]	TDP177
[1]	TDP177																							883.938	2	4336	-	LEYFPIWEVNDDVK	LEYFPIWEVNDDVK	-	T20170314-08	81.999	19.8	4.9e-06
[1]	TDP177
[1]	TDP177
[1]	TDP177												883.937	2	3781	-	LEYFPIWEVNDDVK	LEYFPIWEVNDDVK	-	T20170314-06	80.232	19.3	5e-06
[1]	TDP177																																		883.938	2	2280	-	LEYFPIWEVNDDVK	LEYFPIWEVNDDVK	-	T20170314-11	76.47	21.1	5.4e-06
[1]	TDP177																							589.627	3	1120000	-	LEYFPIWEVNDDVK	LEYFPIWEVNDDVK	-	T20170314-08	67.29	29	6.1e-06	589.626	3	11281	-	LEYFPIWEVNDDVK	LEYFPIWEVNDDVK	-	T20170314-11	67.29	15.4	0.0003
[1]	TDP177																							589.627	3	1120000	-	LEYFPIWEVNDDVK	LEYFPIWEVNDDVK	-	T20170314-08	67.29	29	6.1e-06	589.626	3	11281	-	LEYFPIWEVNDDVK	LEYFPIWEVNDDVK	-	T20170314-11	67.29	15.4	0.0003
[1]	TDP177																																		883.937	2	3030	-	LEYFPIWEVNDDVK	LEYFPIWEVNDDVK	-	T20170314-11	73.733	25.3	6.1e-06
[1]	TDP177												770.353	2	5907	-	LEYFPIWEVNDD	LEYFPIWEVNDD	VK-	T20170314-06	74.502	17	6.7e-06
[1]	TDP177												883.935	2	4888	-	LEYFPIWEVNDDVK	LEYFPIWEVNDDVK	-	T20170314-06	73.709	21.8	6.8e-06
[1]	TDP177
[1]	TDP177
[1]	TDP177																							712.84	2	5501	-	LEYFPIWEVND	LEYFPIWEVND	DVK-	T20170314-08	74.801	18.7	8.8e-06
[1]	TDP177
[1]	TDP177																																		712.84	2	7192	-	LEYFPIWEVND	LEYFPIWEVND	DVK-	T20170314-11	74.083	20.3	9.3e-06
[1]	TDP177																																		899.931	2	8474	-	LEYFPIWEVNDDVK	LEYFP(Oxidation)IW(Oxidation)EVNDDVK	-	T20170314-11	62.167	19.1	9.9e-06
[1]	TDP177																																		589.626	3	13852	-	LEYFPIWEVNDDVK	LEYFPIWEVNDDVK	-	T20170314-11	66.586	26.1	1e-05
[1]	TDP177
[1]	TDP177	883.933	2	3463	-	LEYFPIWEVNDDVK	LEYFPIWEVNDDVK	-	T20170314-04	77.717	21.7	1e-05
[1]	TDP177												883.939	2	3996	-	LEYFPIWEVNDDVK	LEYFPIWEVNDDVK	-	T20170314-06	78.987	19	1.1e-05
[1]	TDP177
[1]	TDP177
[1]	TDP177												589.627	3	1250000	-	LEYFPIWEVNDDVK	LEYFPIWEVNDDVK	-	T20170314-06	67.351	27.7	1.4e-05
[1]	TDP177
[1]	TDP177
[1]	TDP177
[1]	TDP177
[1]	TDP177
[1]	TDP177																																													589.627	3	243902	-
[1]	TDP177												883.937	2	3249	-	LEYFPIWEVNDDVK	LEYFPIWEVNDDVK	-	T20170314-06	77.13	18.3	2.1e-05
[1]	TDP177	883.937	2	3537	-	LEYFPIWEVNDDVK	LEYFPIWEVNDDVK	-	T20170314-04	79.411	19.1	2.5e-05
[1]	TDP177
[1]	TDP177
[1]	TDP177	891.933	2	3924	-	LEYFPIWEVNDDVK	LEYFPIW(Oxidation)EVNDDVK	-	T20170314-04	65.951	16	2.7e-05
[1]	TDP177																							770.354	2	5528	-	LEYFPIWEVNDD	LEYFPIWEVNDD	VK-	T20170314-08	74.543	19.5	2.8e-05
[1]	TDP177																																		589.627	3	1320000	-	LEYFPIWEVNDDVK	LEYFPIWEVNDDVK	-	T20170314-11	66.93	27	3e-05
[1]	TDP177
[1]	TDP177	712.841	2	5608	-	LEYFPIWEVND	LEYFPIWEVND	DVK-	T20170314-04	74.289	16.9	3.1e-05
[1]	TDP177
[1]	TDP177
[1]	TDP177
[1]	TDP177
[1]	TDP177
[1]	TDP177
[1]	TDP177
[1]	TDP177
[1]	TDP177
[1]	TDP177
[1]	TDP177
[1]	TDP177
[1]	TDP177
[1]	TDP177																							589.625	3	13605	-	LEYFPIWEVNDDVK	LEYFPIWEVNDDVK	-	T20170314-08	66.947	22.9	0.00011
[1]	TDP177
[1]	TDP177																							594.957	3	27505	-	LEYFPIWEVNDDVK	LEYFPIW(Oxidation)EVNDDVK	-	T20170314-08	67.51	18.4	0.00011
[1]	TDP177
[1]	TDP177	899.932	2	9044	-	LEYFPIWEVNDDVK	LEYFP(Oxidation)IW(Oxidation)EVNDDVK	-	T20170314-04	62.145	16.1	0.00013
[1]	TDP177												891.933	2	5322	-	LEYFPIWEVNDDVK	LEYFPIW(Oxidation)EVNDDVK	-	T20170314-06	66.006	16.5	0.00014
[1]	TDP177
[1]	TDP177
[1]	TDP177
[1]	TDP177
[1]	TDP177
[1]	TDP177	770.355	2	6720	-	LEYFPIWEVNDD	LEYFPIWEVNDD	VK-	T20170314-04	74.015	15.2	0.00018
[1]	TDP177
[1]	TDP177																																													409.701	2	29946	=-LEYFPIW
[1]	TDP177																																													712.841	2	6938	-
[1]	TDP177
[1]	TDP177																																													589.625	3	18010	-
[1]	TDP177												589.626	3	22300	-	LEYFPIWEVNDDVK	LEYFPIWEVNDDVK	-	T20170314-06	66.998	17.3	0.00063
[1]	TDP177
[1]	TDP177	589.625	3	9273	-	LEYFPIWEVNDDVK	LEYFPIWEVNDDVK	-	T20170314-04	66.605	16.5	0.00066
[1]	TDP177																																		594.958	3	29457	-	LEYFPIWEVNDDVK	LEYFPIW(Oxidation)EVNDDVK	-	T20170314-11	67.186	16.8	0.00085
[1]	TDP177
[2]	TDP206
[2]	TDP206
[2]	TDP206	913.435	2	249907	-	DNQEPWTWYGVKFR	DNQEPWTWYGVKFR	-	T20170314-05	60.452	38.6	8.6e-11
[2]	TDP206
[2]	TDP206
[2]	TDP206																																		761.85	2	36531	-	DNQEPWTWYGVK	DNQEPWTWYGVK	FR-	T20170314-12	61.374	40.7	2.1e-10
[2]	TDP206
[2]	TDP206																																													761.852	2	456063	-
[2]	TDP206
[2]	TDP206												913.437	2	92437	-	DNQEPWTWYGVKFR	DNQEPWTWYGVKFR	-	T20170314-07	60.259	40.2	5.1e-10
[2]	TDP206												913.437	2	92437	-	DNQEPWTWYGVKFR	DNQEPWTWYGVKFR	-	T20170314-07	60.259	40.2	5.1e-10
[2]	TDP206
[2]	TDP206																							913.437	2	30911	-	DNQEPWTWYGVKFR	DNQEPWTWYGVKFR	-	T20170314-09	60.853	39.1	5e-10
[2]	TDP206
[2]	TDP206
[2]	TDP206
[2]	TDP206
[2]	TDP206
[2]	TDP206
[2]	TDP206
[2]	TDP206
[2]	TDP206
[2]	TDP206
[2]	TDP206
[2]	TDP206
[2]	TDP206
[2]	TDP206
[2]	TDP206												761.851	2	20649	-	DNQEPWTWYGVK	DNQEPWTWYGVK	FR-	T20170314-07	59.134	38.9	1.5e-09
[2]	TDP206
[2]	TDP206												761.852	2	391755	-	DNQEPWTWYGVK	DNQEPWTWYGVK	FR-	T20170314-07	59.491	43.8	1.6e-09
[2]	TDP206
[2]	TDP206																																													761.854	2	15800000	-
[2]	TDP206																																		761.852	2	156530	-	DNQEPWTWYGVK	DNQEPWTWYGVK	FR-	T20170314-12	59.242	42.5	1.7e-09
[2]	TDP206																																													761.852	2	28267	-
[2]	TDP206																																													761.851	2	163351	-
[2]	TDP206
[2]	TDP206												913.436	2	423765	-	DNQEPWTWYGVKFR	DNQEPWTWYGVKFR	-	T20170314-07	60.623	37.4	2.6e-09
[2]	TDP206												913.437	2	22429	-	DNQEPWTWYGVKFR	DNQEPWTWYGVKFR	-	T20170314-07	62.229	35.8	2.7e-09
[2]	TDP206
[2]	TDP206																							913.436	2	10021	-	DNQEPWTWYGVKFR	DNQEPWTWYGVKFR	-	T20170314-09	62.178	32.1	3e-09
[2]	TDP206												790.389	2	8583	=-DN	QEPWTWYGVKFR	Q(Gln->pyro-Glu)EPWTWYGVKFR	-	T20170314-07	65.452	31.2	3.1e-09
[2]	TDP206
[2]	TDP206																																		913.437	2	103437	-	DNQEPWTWYGVKFR	DNQEPWTWYGVKFR	-	T20170314-12	60.298	35.9	3.7e-09
[2]	TDP206																							913.437	2	620414	-	DNQEPWTWYGVKFR	DNQEPWTWYGVKFR	-	T20170314-09	60.479	40.4	3.8e-09
[2]	TDP206
[2]	TDP206
[2]	TDP206																																		761.851	2	18962	-	DNQEPWTWYGVK	DNQEPWTWYGVK	FR-	T20170314-12	61.726	39.3	4e-09
[2]	TDP206
[2]	TDP206
[2]	TDP206
[2]	TDP206																							913.438	2	28734	-	DNQEPWTWYGVKFR	DNQEPWTWYGVKFR	-	T20170314-09	60.129	44	5.2e-09
[2]	TDP206
[2]	TDP206
[2]	TDP206																							761.853	2	19842	-	DNQEPWTWYGVK	DNQEPWTWYGVK	FR-	T20170314-09	59.669	31.9	7.8e-09
[2]	TDP206
[2]	TDP206
[2]	TDP206	913.44	2	9467	-	DNQEPWTWYGVKFR	DNQEPWTWYGVKFR	-	T20170314-05	60.825	26.4	9.5e-09
[2]	TDP206																																													761.852	2	69883	-
[2]	TDP206
[2]	TDP206
[2]	TDP206
[2]	TDP206
[2]	TDP206
[2]	TDP206																																		761.854	2	14000000	-	DNQEPWTWYGVK	DNQEPWTWYGVK	FR-	T20170314-12	58.903	40.7	1.3e-08
[2]	TDP206																							761.853	2	2830000	-	DNQEPWTWYGVK	DNQEPWTWYGVK	FR-	T20170314-09	59.303	39.3	1.3e-08
[2]	TDP206																							790.389	2	17001	=-DN	QEPWTWYGVKFR	Q(Gln->pyro-Glu)EPWTWYGVKFR	-	T20170314-09	65.675	31.9	1.4e-08
[2]	TDP206																																		761.851	2	38065	-	DNQEPWTWYGVK	DNQEPWTWYGVK	FR-	T20170314-12	58.533	41.2	1.4e-08
[2]	TDP206	761.853	2	14057	-	DNQEPWTWYGVK	DNQEPWTWYGVK	FR-	T20170314-05	59.087	35.8	1.6e-08
[2]	TDP206	913.438	2	30290	-	DNQEPWTWYGVKFR	DNQEPWTWYGVKFR	-	T20170314-05	60.112	34.1	1.6e-08
[2]	TDP206																							913.437	2	12363	-	DNQEPWTWYGVKFR	DNQEPWTWYGVKFR	-	T20170314-09	61.229	31.3	1.7e-08
[2]	TDP206																																													761.852	2	42681	-
[2]	TDP206																																													761.845	2	35078	-
[2]	TDP206																																													761.85	2	20670	-
[2]	TDP206
[2]	TDP206
[2]	TDP206																							761.852	2	60318	-	DNQEPWTWYGVK	DNQEPWTWYGVK	FR-	T20170314-09	58.937	35.5	2e-08
[2]	TDP206
[2]	TDP206
[2]	TDP206
[2]	TDP206
[2]	TDP206
[2]	TDP206
[2]	TDP206
[2]	TDP206
[2]	TDP206
[2]	TDP206																																		913.439	2	20486	-	DNQEPWTWYGVKFR	DNQEPWTWYGVKFR	-	T20170314-12	59.943	34.7	5.1e-08
[2]	TDP206
[2]	TDP206
[2]	TDP206																							761.854	2	5401	-	DNQEPWTWYGVK	DNQEPWTWYGVK	FR-	T20170314-09	60.091	31.4	6.4e-08
[2]	TDP206
[2]	TDP206
[2]	TDP206
[2]	TDP206												670.35	2	34440	=-DNQE	PWTWYGVKFR	PWTWYGVKFR	-	T20170314-07	60.413	36.5	8.8e-08
[2]	TDP206
[2]	TDP206
[2]	TDP206	790.389	2	19216	=-DN	QEPWTWYGVKFR	Q(Gln->pyro-Glu)EPWTWYGVKFR	-	T20170314-05	65.492	29	9.5e-08
[2]	TDP206
[2]	TDP206																																		761.852	2	26418	-	DNQEPWTWYGVK	DNQEPWTWYGVK	FR-	T20170314-12	59.938	30.9	1.1e-07
[2]	TDP206	670.352	2	10192	=-DNQE	PWTWYGVKFR	PWTWYGVKFR	-	T20170314-05	60.194	28.3	1.1e-07
[2]	TDP206																																		704.338	2	31458	=-D	NQEPWTWYGVK	NQEPWTWYGVK	FR-	T20170314-12	55.334	34.5	1.2e-07
[2]	TDP206																																													761.851	2	16184	-
[2]	TDP206
[2]	TDP206
[2]	TDP206																							913.435	2	9793	-	DNQEPWTWYGVKFR	DNQEPWTWYGVKFR	-	T20170314-09	61.632	25.7	1.5e-07
[2]	TDP206																																													769.848	2	20134	-
[2]	TDP206
[2]	TDP206	913.44	2	2244	-	DNQEPWTWYGVKFR	DNQEPWTWYGVKFR	-	T20170314-05	61.917	26.2	1.6e-07
[2]	TDP206																							761.853	2	9201	-	DNQEPWTWYGVK	DNQEPWTWYGVK	FR-	T20170314-09	61.65	35.3	1.9e-07
[2]	TDP206
[2]	TDP206
[2]	TDP206																																		761.855	2	59062	-	DNQEPWTWYGVK	DNQEPWTWYGVK	FR-	T20170314-12	59.585	28	2.4e-07
[2]	TDP206
[2]	TDP206																							761.851	2	33240	-	DNQEPWTWYGVK	DNQEPWTWYGVK	FR-	T20170314-09	61.982	29.1	3.6e-07
[2]	TDP206
[2]	TDP206																							704.336	2	16199	=-D	NQEPWTWYGVK	NQEPWTWYGVK	FR-	T20170314-09	55.75	29.4	5.3e-07
[2]	TDP206
[2]	TDP206																							913.436	2	6849	-	DNQEPWTWYGVKFR	DNQEPWTWYGVKFR	-	T20170314-08	60.166	23.6	5.3e-07
[2]	TDP206																																		769.852	2	16765	-	DNQEPWTWYGVK	DNQEPW(Oxidation)TWYGVK	FR-	T20170314-12	54.477	28.8	6.2e-07
[2]	TDP206																																													769.849	2	12530	-
[2]	TDP206																							913.435	2	6344	-	DNQEPWTWYGVKFR	DNQEPWTWYGVKFR	-	T20170314-09	62.555	24.7	6.8e-07
[2]	TDP206																																													769.851	2	23090	-
[2]	TDP206
[2]	TDP206																							670.351	2	10200	=-DNQE	PWTWYGVKFR	PWTWYGVKFR	-	T20170314-09	60.534	26.6	8.5e-07
[2]	TDP206	913.436	2	4934	-	DNQEPWTWYGVKFR	DNQEPWTWYGVKFR	-	T20170314-05	61.433	23.2	8.7e-07
[2]	TDP206
[2]	TDP206
[2]	TDP206
[2]	TDP206
[2]	TDP206																							835.382	2	8330	-	DNQEPWTWYGVKF	DNQEPWTWYGVKF	R-	T20170314-09	69.868	21.9	1.7e-06
[2]	TDP206																																													769.851	2	20971	-
[2]	TDP206
[2]	TDP206
[2]	TDP206												913.435	2	5128	-	DNQEPWTWYGVKFR	DNQEPWTWYGVKFR	-	T20170314-07	61.286	23.3	2.9e-06
[2]	TDP206
[2]	TDP206
[2]	TDP206
[2]	TDP206
[2]	TDP206																							609.293	3	389519	-	DNQEPWTWYGVKFR	DNQEPWTWYGVKFR	-	T20170314-09	62.209	26.3	4.1e-06
[2]	TDP206												835.383	2	9133	-	DNQEPWTWYGVKF	DNQEPWTWYGVKF	R-	T20170314-07	69.766	21.8	4.3e-06
[2]	TDP206
[2]	TDP206
[2]	TDP206
[2]	TDP206																																		769.853	2	16159	-	DNQEPWTWYGVK	DNQEPWTW(Oxidation)YGVK	FR-	T20170314-12	56.581	29.3	5e-06
[2]	TDP206
[2]	TDP206
[2]	TDP206												609.292	3	378944	-	DNQEPWTWYGVKFR	DNQEPWTWYGVKFR	-	T20170314-07	61.22	24.2	6.7e-06
[2]	TDP206																																													761.852	2	4457	-
[2]	TDP206	609.292	3	14300000	-	DNQEPWTWYGVKFR	DNQEPWTWYGVKFR	-	T20170314-05	60.343	23.6	6.9e-06
[2]	TDP206																																													777.844	2	22518	-
[2]	TDP206
[2]	TDP206
[2]	TDP206																																		769.849	2	28096	-	DNQEPWTWYGVK	DNQEPWTW(Oxidation)YGVK	FR-	T20170314-12	52.895	19.1	1.1e-05
[2]	TDP206
[2]	TDP206
[2]	TDP206																																													704.338	2	13353	=-D
[2]	TDP206
[2]	TDP206																																		619.759	2	567254	-	DNQEPWTWY	DNQEPWTWY	GVKFR-	T20170314-12	67.402	20.6	1.7e-05
[2]	TDP206
[2]	TDP206	609.292	3	152167	-	DNQEPWTWYGVKFR	DNQEPWTWYGVKFR	-	T20170314-05	61.059	20.5	0.00014
[2]	TDP206	609.292	3	152167	-	DNQEPWTWYGVKFR	DNQEPWTWYGVKFR	-	T20170314-05	61.059	20.5	0.00014
[2]	TDP206
[2]	TDP206	609.293	3	118642	-	DNQEPWTWYGVKFR	DNQEPWTWYGVKFR	-	T20170314-05	61.415	23.1	2.2e-05
[2]	TDP206
[2]	TDP206																																		769.85	2	8168	-	DNQEPWTWYGVK	DNQEPWTW(Oxidation)YGVK	FR-	T20170314-12	55.92	18.5	2.5e-05
[2]	TDP206
[2]	TDP206
[2]	TDP206
[2]	TDP206																																													769.854	2	13966	-
[2]	TDP206												609.293	3	418177	-	DNQEPWTWYGVKFR	DNQEPWTWYGVKFR	-	T20170314-07	62.31	23.6	4e-05
[2]	TDP206																							609.292	3	380682	-	DNQEPWTWYGVKFR	DNQEPWTWYGVKFR	-	T20170314-09	61.132	19.8	4.1e-05
[2]	TDP206
[2]	TDP206																							609.291	3	78508	-	DNQEPWTWYGVKFR	DNQEPWTWYGVKFR	-	T20170314-09	60.073	18.4	4.2e-05
[2]	TDP206												761.852	2	7881	-	DNQEPWTWYGVK	DNQEPWTWYGVK	FR-	T20170314-07	61.877	18	4.4e-05
[2]	TDP206																							913.436	2	4288	-	DNQEPWTWYGVKFR	DNQEPWTWYGVKFR	-	T20170314-09	64.199	15.7	4.7e-05
[2]	TDP206
[2]	TDP206
[2]	TDP206
[2]	TDP206												609.293	3	240195	-	DNQEPWTWYGVKFR	DNQEPWTWYGVKFR	-	T20170314-07	61.59	21.9	5.8e-05
[2]	TDP206	609.294	3	65268	-	DNQEPWTWYGVKFR	DNQEPWTWYGVKFR	-	T20170314-05	62.489	19.5	5.9e-05
[2]	TDP206
[2]	TDP206
[2]	TDP206												609.293	3	43832	-	DNQEPWTWYGVKFR	DNQEPWTWYGVKFR	-	T20170314-07	66.955	21.2	6.7e-05
[2]	TDP206												609.292	3	750302	-	DNQEPWTWYGVKFR	DNQEPWTWYGVKFR	-	T20170314-07	60.86	21.3	6.9e-05
[2]	TDP206
[2]	TDP206
[2]	TDP206												609.29	3	49734	-	DNQEPWTWYGVKFR	DNQEPWTWYGVKFR	-	T20170314-07	60.17	17.6	0.00023												609.293	3	3060000	-	DNQEPWTWYGVKFR	DNQEPWTWYGVKFR	-	T20170314-12	60.17	20.6	7.2e-05
[2]	TDP206												609.29	3	49734	-	DNQEPWTWYGVKFR	DNQEPWTWYGVKFR	-	T20170314-07	60.17	17.6	0.00023												609.293	3	3060000	-	DNQEPWTWYGVKFR	DNQEPWTWYGVKFR	-	T20170314-12	60.17	20.6	7.2e-05
[2]	TDP206	609.293	3	223012	-	DNQEPWTWYGVKFR	DNQEPWTWYGVKFR	-	T20170314-05	62.132	21.4	7.7e-05
[2]	TDP206
[2]	TDP206
[2]	TDP206	614.624	3	13662	-	DNQEPWTWYGVKFR	DNQEPWTW(Oxidation)YGVKFR	-	T20170314-05	58.404	19.5	8.2e-05
[2]	TDP206
[2]	TDP206																																													619.759	2	289464	-
[2]	TDP206
[2]	TDP206
[2]	TDP206
[2]	TDP206
[2]	TDP206
[2]	TDP206
[2]	TDP206
[2]	TDP206												609.293	3	16700000	-	DNQEPWTWYGVKFR	DNQEPWTWYGVKFR	-	T20170314-07	60.507	18.1	0.00011
[2]	TDP206																							609.293	3	28887	-	DNQEPWTWYGVKFR	DNQEPWTWYGVKFR	-	T20170314-09	68.906	17.6	0.00011
[2]	TDP206
[2]	TDP206
[2]	TDP206
[2]	TDP206
[2]	TDP206
[2]	TDP206																							609.293	3	214315	-	DNQEPWTWYGVKFR	DNQEPWTWYGVKFR	-	T20170314-09	61.49	18.7	0.00013
[2]	TDP206	609.293	3	103072	-	DNQEPWTWYGVKFR	DNQEPWTWYGVKFR	-	T20170314-05	61.756	18.5	0.00014
[2]	TDP206																							609.292	3	116725	-	DNQEPWTWYGVKFR	DNQEPWTWYGVKFR	-	T20170314-09	61.843	17.3	0.00015
[2]	TDP206																							609.293	3	12200000	-	DNQEPWTWYGVKFR	DNQEPWTWYGVKFR	-	T20170314-09	60.417	19.9	0.00015
[2]	TDP206
[2]	TDP206
[2]	TDP206																							609.295	3	6432	-	DNQEPWTWYGVKFR	DNQEPWTWYGVKFR	-	T20170314-09	83.443	19.3	0.00016
[2]	TDP206
[2]	TDP206
[2]	TDP206
[2]	TDP206
[2]	TDP206																							609.294	3	99105	-	DNQEPWTWYGVKFR	DNQEPWTWYGVKFR	-	T20170314-09	62.574	19.8	0.00019
[2]	TDP206																							609.293	3	60206	-	DNQEPWTWYGVKFR	DNQEPWTWYGVKFR	-	T20170314-09	65.539	18.1	0.00019
[2]	TDP206												609.295	3	6893	-	DNQEPWTWYGVKFR	DNQEPWTWYGVKFR	-	T20170314-07	78.283	17.8	0.0002
[2]	TDP206
[2]	TDP206																							614.625	3	21478	-	DNQEPWTWYGVKFR	DNQEPWTWY(Oxidation)GVKFR	-	T20170314-09	59.099	19.7	0.0002
[2]	TDP206
[2]	TDP206												609.293	3	31010	-	DNQEPWTWYGVKFR	DNQEPWTWYGVKFR	-	T20170314-07	68.646	18	0.00021
[2]	TDP206																							609.293	3	80535	-	DNQEPWTWYGVKFR	DNQEPWTWYGVKFR	-	T20170314-09	63.742	17.1	0.00021
[2]	TDP206	609.294	3	39137	-	DNQEPWTWYGVKFR	DNQEPWTWYGVKFR	-	T20170314-05	62.828	18.8	0.00022
[2]	TDP206																																		609.293	3	324716	-	DNQEPWTWYGVKFR	DNQEPWTWYGVKFR	-	T20170314-12	60.552	20.1	0.00022
[2]	TDP206																							609.294	3	38536	-	DNQEPWTWYGVKFR	DNQEPWTWYGVKFR	-	T20170314-09	66.722	16.7	0.00022
[2]	TDP206
[2]	TDP206												609.294	3	9683	-	DNQEPWTWYGVKFR	DNQEPWTWYGVKFR	-	T20170314-07	79.69	16.5	0.00023
[2]	TDP206																							609.292	3	7020	-	DNQEPWTWYGVKFR	DNQEPWTWYGVKFR	-	T20170314-09	78.925	16.2	0.00024
[2]	TDP206																																													619.759	2	95393	-
[2]	TDP206
[2]	TDP206
[2]	TDP206
[2]	TDP206
[2]	TDP206																							614.625	3	57974	-	DNQEPWTWYGVKFR	DNQEPWTWY(Oxidation)GVKFR	-	T20170314-09	58.534	17.6	0.00026
[2]	TDP206																							609.293	3	758862	-	DNQEPWTWYGVKFR	DNQEPWTWYGVKFR	-	T20170314-09	60.787	15.6	0.00028
[2]	TDP206												609.294	3	8879	-	DNQEPWTWYGVKFR	DNQEPWTWYGVKFR	-	T20170314-07	81.108	16.1	0.00028
[2]	TDP206
[2]	TDP206
[2]	TDP206
[2]	TDP206
[2]	TDP206												609.293	3	36309	-	DNQEPWTWYGVKFR	DNQEPWTWYGVKFR	-	T20170314-07	67.332	17	0.00034
[2]	TDP206
[2]	TDP206
[2]	TDP206
[2]	TDP206
[2]	TDP206																																		638.803	2	20406	=-DN	QEPWTWYGVK	Q(Gln->pyro-Glu)EPWTWYGVK	FR-	T20170314-12	66.317	17.7	0.00038
[2]	TDP206
[2]	TDP206
[2]	TDP206	609.293	3	11354	-	DNQEPWTWYGVKFR	DNQEPWTWYGVKFR	-	T20170314-05	69.093	15.3	0.00039
[2]	TDP206
[2]	TDP206
[2]	TDP206	609.294	3	19719	-	DNQEPWTWYGVKFR	DNQEPWTWYGVKFR	-	T20170314-05	67.229	18	0.00043
[2]	TDP206
[2]	TDP206	609.297	3	24792	-	DNQEPWTWYGVKFR	DNQEPWTWYGVKFR	-	T20170314-05	64.954	16.8	0.00044
[2]	TDP206												609.293	3	64953	-	DNQEPWTWYGVKFR	DNQEPWTWYGVKFR	-	T20170314-06	60.549	15.5	0.00045
[2]	TDP206												609.293	3	171537	-	DNQEPWTWYGVKFR	DNQEPWTWYGVKFR	-	T20170314-07	61.948	15.8	0.00048
[2]	TDP206																							609.292	3	8696	-	DNQEPWTWYGVKFR	DNQEPWTWYGVKFR	-	T20170314-09	80.675	15.7	0.00052
[2]	TDP206												609.295	3	34003	-	DNQEPWTWYGVKFR	DNQEPWTWYGVKFR	-	T20170314-07	64.107	16.9	0.00053
[2]	TDP206	609.295	3	7353	-	DNQEPWTWYGVKFR	DNQEPWTWYGVKFR	-	T20170314-05	78.769	17.2	0.00053
[2]	TDP206
[2]	TDP206																							609.293	3	43466	-	DNQEPWTWYGVKFR	DNQEPWTWYGVKFR	-	T20170314-09	66.33	16.1	0.00055
[2]	TDP206												609.294	3	13782	-	DNQEPWTWYGVKFR	DNQEPWTWYGVKFR	-	T20170314-07	72.58	17.5	0.00055
[2]	TDP206												609.293	3	36403	-	DNQEPWTWYGVKFR	DNQEPWTWYGVKFR	-	T20170314-07	66.229	16.1	0.00056
[2]	TDP206
[2]	TDP206												609.293	3	35783	-	DNQEPWTWYGVKFR	DNQEPWTWYGVKFR	-	T20170314-07	64.466	15.6	0.00063
[2]	TDP206
[2]	TDP206												609.293	3	71150	-	DNQEPWTWYGVKFR	DNQEPWTWYGVKFR	-	T20170314-07	63.394	16.8	0.00064
[2]	TDP206
[2]	TDP206
[2]	TDP206	609.294	3	15635	-	DNQEPWTWYGVKFR	DNQEPWTWYGVKFR	-	T20170314-05	67.596	16.7	0.00067
[2]	TDP206
[2]	TDP206	609.295	3	14708	-	DNQEPWTWYGVKFR	DNQEPWTWYGVKFR	-	T20170314-05	68.594	15.6	0.00068
[2]	TDP206												609.294	3	11630	-	DNQEPWTWYGVKFR	DNQEPWTWYGVKFR	-	T20170314-07	74.01	15.3	0.0007
[2]	TDP206
[2]	TDP206												614.623	3	33909	-	DNQEPWTWYGVKFR	DNQEPWTW(Oxidation)YGVKFR	-	T20170314-07	57.711	17.5	0.00074
[2]	TDP206
[2]	TDP206	609.293	3	28110	-	DNQEPWTWYGVKFR	DNQEPWTWYGVKFR	-	T20170314-05	64.03	15	0.00078
[2]	TDP206																							609.293	3	73153	-	DNQEPWTWYGVKFR	DNQEPWTWYGVKFR	-	T20170314-09	64.081	15.4	0.00078
[2]	TDP206
[2]	TDP206
[2]	TDP206	614.624	3	18301	-	DNQEPWTWYGVKFR	DNQEPW(Oxidation)TWYGVKFR	-	T20170314-05	54.151	17.2	0.00087
[2]	TDP206
[2]	TDP206												609.293	3	114518	-	DNQEPWTWYGVKFR	DNQEPWTWYGVKFR	-	T20170314-07	62.689	16.2	0.00094
[2]	TDP206																							609.295	3	58043	-	DNQEPWTWYGVKFR	DNQEPWTWYGVKFR	-	T20170314-09	64.443	15.1	0.00097
[2]	TDP206	609.293	3	17084	-	DNQEPWTWYGVKFR	DNQEPWTWYGVKFR	-	T20170314-05	68.247	17.4	0.001
[2]	TDP206
[2]	TDP206																							609.293	3	107575	-	DNQEPWTWYGVKFR	DNQEPWTWYGVKFR	-	T20170314-08	60.284	15.9	0.001
[2]	TDP206																																													609.292	3	25888	-
[2]	TDP206												609.293	3	8998	-	DNQEPWTWYGVKFR	DNQEPWTWYGVKFR	-	T20170314-07	82.131	15.8	0.0011
[2]	TDP206
[2]	TDP206												614.623	3	20950	-	DNQEPWTWYGVKFR	DNQEPWTW(Oxidation)YGVKFR	-	T20170314-07	56.857	17	0.0013
[2]	TDP206
[2]	TDP206
[2]	TDP206	570.951	3	90913	=-D	NQEPWTWYGVKFR	NQEPWTWYGVKFR	-	T20170314-05	57.556	15.9	0.0015
[2]	TDP206
[2]	TDP206												609.293	3	46084	-	DNQEPWTWYGVKFR	DNQEPWTWYGVKFR	-	T20170314-07	66.608	15.3	0.0016
[2]	TDP206																																													638.802	2	13751	=-DN
[2]	TDP206
[2]	TDP206
[2]	TDP206																							614.62	3	14726	-	DNQEPWTWYGVKFR	DNQEPWTW(Oxidation)YGVKFR	-	T20170314-09	60.326	16	0.0018
[2]	TDP206
[2]	TDP206
[2]	TDP206	619.956	3	10710	-	DNQEPWTWYGVKFR	DNQEP(Oxidation)WTW(Oxidation)YGVKFR	-	T20170314-05	56.966	15.4	0.0028
[2]	TDP206																							614.624	3	52378	-	DNQEPWTWYGVKFR	DNQEPWTW(Oxidation)YGVKFR	-	T20170314-09	57.86	16.6	0.003
[2]	TDP206
[2]	TDP206												619.955	3	5578	-	DNQEPWTWYGVKFR	DNQEP(Oxidation)W(Oxidation)TWYGVKFR	-	T20170314-07	55.315	15.2	0.0044
[3]	TDP187
[3]	TDP187
[3]	TDP187																							915.958	2	127029	-	LDQIYKLSNWFFEQ	LDQIYKLSNWFFEQ	-	T20170314-08	73.729	37.5	1.7e-09
[3]	TDP187
[3]	TDP187
[3]	TDP187
[3]	TDP187	915.957	2	9881	-	LDQIYKLSNWFFEQ	LDQIYKLSNWFFEQ	-	T20170314-04	72.905	36.2	2.6e-09
[3]	TDP187
[3]	TDP187																																		915.958	2	29020	-	LDQIYKLSNWFFEQ	LDQIYKLSNWFFEQ	-	T20170314-11	73.486	36.6	2.9e-09
[3]	TDP187																																		915.96	2	2360000	-	LDQIYKLSNWFFEQ	LDQIYKLSNWFFEQ	-	T20170314-11	73.14	40.2	3.2e-09
[3]	TDP187
[3]	TDP187
[3]	TDP187
[3]	TDP187
[3]	TDP187
[3]	TDP187												915.958	2	826753	-	LDQIYKLSNWFFEQ	LDQIYKLSNWFFEQ	-	T20170314-06	73.632	40.1	4.4e-09
[3]	TDP187
[3]	TDP187
[3]	TDP187																																		915.956	2	10232	-	LDQIYKLSNWFFEQ	LDQIYKLSNWFFEQ	-	T20170314-11	72.786	35.2	6.1e-09
[3]	TDP187																																													923.955	2	13769	-
[3]	TDP187
[3]	TDP187
[3]	TDP187
[3]	TDP187																																		915.957	2	7511	-	LDQIYKLSNWFFEQ	LDQIYKLSNWFFEQ	-	T20170314-11	71.859	31.5	1e-08
[3]	TDP187																																													915.957	2	38263	-
[3]	TDP187																																													915.959	2	1710000	-
[3]	TDP187	915.958	2	189464	-	LDQIYKLSNWFFEQ	LDQIYKLSNWFFEQ	-	T20170314-04	73.254	40.6	1.1e-08
[3]	TDP187
[3]	TDP187
[3]	TDP187																																													915.96	2	5415	-
[3]	TDP187												915.958	2	9901	-	LDQIYKLSNWFFEQ	LDQIYKLSNWFFEQ	-	T20170314-06	73.975	39.1	1.2e-08
[3]	TDP187
[3]	TDP187
[3]	TDP187
[3]	TDP187
[3]	TDP187
[3]	TDP187												915.959	2	3331	-	LDQIYKLSNWFFEQ	LDQIYKLSNWFFEQ	-	T20170314-06	72.257	32.4	1.9e-08
[3]	TDP187
[3]	TDP187
[3]	TDP187																																													915.957	2	8761	-
[3]	TDP187
[3]	TDP187																																													915.958	2	5824	-
[3]	TDP187
[3]	TDP187																							915.958	2	6999	-	LDQIYKLSNWFFEQ	LDQIYKLSNWFFEQ	-	T20170314-08	73.393	32.9	2.6e-08
[3]	TDP187
[3]	TDP187																																		915.956	2	7218	-	LDQIYKLSNWFFEQ	LDQIYKLSNWFFEQ	-	T20170314-12	73.052	30.2	2.9e-08
[3]	TDP187																																		915.959	2	10593	-	LDQIYKLSNWFFEQ	LDQIYKLSNWFFEQ	-	T20170314-11	73.835	30.9	3.6e-08
[3]	TDP187
[3]	TDP187	915.96	2	4950	-	LDQIYKLSNWFFEQ	LDQIYKLSNWFFEQ	-	T20170314-04	73.612	34.3	4.2e-08
[3]	TDP187	923.954	2	3432	-	LDQIYKLSNWFFEQ	LDQIYKLSNW(Oxidation)FFEQ	-	T20170314-04	67.979	20.4	1.4e-06
[3]	TDP187	923.954	2	3432	-	LDQIYKLSNWFFEQ	LDQIYKLSNW(Oxidation)FFEQ	-	T20170314-04	67.979	20.4	1.4e-06
[3]	TDP187
[3]	TDP187
[3]	TDP187
[3]	TDP187																							915.959	2	6721	-	LDQIYKLSNWFFEQ	LDQIYKLSNWFFEQ	-	T20170314-09	73.205	31.4	4.9e-08
[3]	TDP187
[3]	TDP187
[3]	TDP187																																													915.96	2	3083	-
[3]	TDP187
[3]	TDP187	915.956	2	2443	-	LDQIYKLSNWFFEQ	LDQIYKLSNWFFEQ	-	T20170314-05	72.949	28	5.8e-08
[3]	TDP187	915.959	2	4130	-	LDQIYKLSNWFFEQ	LDQIYKLSNWFFEQ	-	T20170314-04	71.822	25	6e-08
[3]	TDP187
[3]	TDP187												915.959	2	3357	-	LDQIYKLSNWFFEQ	LDQIYKLSNWFFEQ	-	T20170314-07	72.918	27.7	7e-08
[3]	TDP187
[3]	TDP187
[3]	TDP187
[3]	TDP187																																													915.96	2	6249	-
[3]	TDP187																																													923.95	2	9752	-
[3]	TDP187												923.955	2	7563	-	LDQIYKLSNWFFEQ	LDQIYKLSNW(Oxidation)FFEQ	-	T20170314-06	68.284	27.5	1.3e-07
[3]	TDP187
[3]	TDP187
[3]	TDP187																																		923.953	2	16088	-	LDQIYKLSNWFFEQ	LDQIYKLSNW(Oxidation)FFEQ	-	T20170314-11	67.909	29.8	1.7e-07
[3]	TDP187
[3]	TDP187																							923.955	2	9178	-	LDQIYKLSNWFFEQ	LDQIYKLSNW(Oxidation)FFEQ	-	T20170314-08	68.279	32.9	1.7e-07
[3]	TDP187
[3]	TDP187												915.956	2	2784	-	LDQIYKLSNWFFEQ	LDQIYKLSNWFFEQ	-	T20170314-06	74.365	26.3	2.1e-07
[3]	TDP187
[3]	TDP187												915.959	2	5248	-	LDQIYKLSNWFFEQ	LDQIYKLSNWFFEQ	-	T20170314-06	73.286	26.7	2.4e-07
[3]	TDP187
[3]	TDP187
[3]	TDP187
[3]	TDP187
[3]	TDP187
[3]	TDP187	801.902	2	7330	=-LD	QIYKLSNWFFEQ	QIYKLSNWFFEQ	-	T20170314-04	65.858	30	3e-07
[3]	TDP187
[3]	TDP187
[3]	TDP187
[3]	TDP187
[3]	TDP187																																		915.969	2	6050	-	LDQIYKLSNWFFEQ	LDQIYKLSNWFFEQ	-	T20170314-11	74.187	25.2	3.9e-07
[3]	TDP187
[3]	TDP187
[3]	TDP187																																		915.958	2	4701	-	LDQIYKLSNWFFEQ	LDQIYKLSNWFFEQ	-	T20170314-11	72.222	27	4.7e-07
[3]	TDP187																							640.338	2	48157	-	LDQIYKLSNW	LDQIYKLSNW	FFEQ-	T20170314-08	57.294	32.5	4.8e-07
[3]	TDP187																							915.958	2	3271	-	LDQIYKLSNWFFEQ	LDQIYKLSNWFFEQ	-	T20170314-08	74.124	23.6	5.6e-07
[3]	TDP187																																		915.961	2	2898	-	LDQIYKLSNWFFEQ	LDQIYKLSNWFFEQ	-	T20170314-11	75.12	24.6	6.3e-07
[3]	TDP187																																													547.298	2	207672	-
[3]	TDP187
[3]	TDP187																																		640.339	2	92330	-	LDQIYKLSNW	LDQIYKLSNW	FFEQ-	T20170314-11	57.686	29.1	7.4e-07
[3]	TDP187																																		923.955	2	8167	-	LDQIYKLSNWFFEQ	LDQIYKLSNW(Oxidation)FFEQ	-	T20170314-11	70.414	27	7.7e-07
[3]	TDP187
[3]	TDP187
[3]	TDP187
[3]	TDP187
[3]	TDP187												640.337	2	19884	-	LDQIYKLSNW	LDQIYKLSNW	FFEQ-	T20170314-06	57.764	25.4	1e-06
[3]	TDP187
[3]	TDP187																																													801.902	2	14395	=-LD
[3]	TDP187																																													640.338	2	68497	-
[3]	TDP187
[3]	TDP187																																		640.337	2	56989	-	LDQIYKLSNW	LDQIYKLSNW	FFEQ-	T20170314-11	57.339	29	1.3e-06
[3]	TDP187
[3]	TDP187
[3]	TDP187
[3]	TDP187												801.902	2	15892	=-LD	QIYKLSNWFFEQ	QIYKLSNWFFEQ	-	T20170314-06	66.234	28.6	1.3e-06
[3]	TDP187																																		915.959	2	6673	-	LDQIYKLSNWFFEQ	LDQIYKLSNWFFEQ	-	T20170314-12	73.41	24.5	1.4e-06
[3]	TDP187																																		599.798	2	252488	=-LDQIY	KLSNWFFEQ	KLSNWFFEQ	-	T20170314-11	59.118	26.2	1.5e-06
[3]	TDP187																							640.337	2	128016	-	LDQIYKLSNW	LDQIYKLSNW	FFEQ-	T20170314-08	57.635	29.9	1.8e-06
[3]	TDP187
[3]	TDP187																																													640.337	2	617688	-
[3]	TDP187																							547.297	2	91815	-	LDQIYKLSN	LDQIYKLSN	WFFEQ-	T20170314-08	43.076	26.9	2.3e-06
[3]	TDP187																																		915.957	2	2539	-	LDQIYKLSNWFFEQ	LDQIYKLSNWFFEQ	-	T20170314-11	75.539	21.4	2.4e-06
[3]	TDP187
[3]	TDP187																																													610.975	3	6377	-
[3]	TDP187																																													599.798	2	20974	=-LDQIY
[3]	TDP187																																													599.798	2	1150000	=-LDQIY
[3]	TDP187
[3]	TDP187																																		681.331	2	8912	=-LDQI	YKLSNWFFEQ	YKLSNWFFEQ	-	T20170314-11	63.562	26.8	3.7e-06
[3]	TDP187																																		801.9	2	8531	=-LD	QIYKLSNWFFEQ	QIYKLSNWFFEQ	-	T20170314-11	66.082	26.9	3.8e-06
[3]	TDP187
[3]	TDP187	640.337	2	26187	-	LDQIYKLSNW	LDQIYKLSNW	FFEQ-	T20170314-04	57.573	26	4.7e-06
[3]	TDP187																																													915.965	2	4985	-
[3]	TDP187
[3]	TDP187																																													640.338	2	15593	-
[3]	TDP187												599.798	2	17295	=-LDQIY	KLSNWFFEQ	KLSNWFFEQ	-	T20170314-06	58.867	23.3	7.1e-06
[3]	TDP187
[3]	TDP187																							547.298	2	65092	-	LDQIYKLSN	LDQIYKLSN	WFFEQ-	T20170314-08	43.438	26.3	7.4e-06
[3]	TDP187
[3]	TDP187																																													915.956	2	3417	-
[3]	TDP187
[3]	TDP187
[3]	TDP187																																		616.306	3	29564	-	LDQIYKLSNWFFEQ	LDQIYKLSNW(Oxidation)FFEQ	-	T20170314-11	67.903	21.9	2e-05
[3]	TDP187
[3]	TDP187																																													547.298	2	80290	-
[3]	TDP187																																													793.39	2	7357	=-LD
[3]	TDP187																							599.798	2	58556	=-LDQIY	KLSNWFFEQ	KLSNWFFEQ	-	T20170314-08	58.401	21.5	2.6e-05
[3]	TDP187
[3]	TDP187
[3]	TDP187																																		599.8	2	10075	=-LDQIY	KLSNWFFEQ	KLSNWFFEQ	-	T20170314-11	58.793	20.7	3.1e-05
[3]	TDP187																																													923.954	2	12323	-
[3]	TDP187
[3]	TDP187
[3]	TDP187
[3]	TDP187
[3]	TDP187																																		793.389	2	4290	=-LD	QIYKLSNWFFEQ	Q(Gln->pyro-Glu)IYKLSNWFFEQ	-	T20170314-11	79.949	17.2	5.6e-05
[3]	TDP187
[3]	TDP187																																		610.973	3	13696	-	LDQIYKLSNWFFEQ	LDQIYKLSNWFFEQ	-	T20170314-11	72.966	19	7.6e-05
[3]	TDP187
[3]	TDP187
[3]	TDP187
[3]	TDP187																							801.903	2	10117	=-LD	QIYKLSNWFFEQ	QIYKLSNWFFEQ	-	T20170314-08	66.168	21.7	9.4e-05
[3]	TDP187
[3]	TDP187
[3]	TDP187
[3]	TDP187																																													616.305	3	26091	-
[3]	TDP187
[3]	TDP187
[3]	TDP187
[3]	TDP187
[3]	TDP187
[3]	TDP187
[3]	TDP187
[3]	TDP187
[3]	TDP187
[3]	TDP187																																													446.76	2	372089	-
[3]	TDP187	793.39	2	4019	=-LD	QIYKLSNWFFEQ	Q(Gln->pyro-Glu)IYKLSNWFFEQ	-	T20170314-04	80.445	18.9	0.0003
[3]	TDP187
[3]	TDP187
[3]	TDP187																							479.209	2	263349	=-LDQIYKL	SNWFFEQ	SNWFFEQ	-	T20170314-08	62.612	21.7	0.00037
[3]	TDP187
[3]	TDP187																																													931.952	2	8254	-
[3]	TDP187
[3]	TDP187
[3]	TDP187												931.952	2	15956	-	LDQIYKLSNWFFEQ	LDQIY(Oxidation)KLSNW(Oxidation)FFEQ	-	T20170314-06	71.327	17.1	0.00058
[3]	TDP187																																													599.799	2	30074	=-LDQIY
[3]	TDP187												616.306	3	16930	-	LDQIYKLSNWFFEQ	LDQIYKLSNW(Oxidation)FFEQ	-	T20170314-06	68.312	17	0.00079
[3]	TDP187
[3]	TDP187																																		931.951	2	7455	-	LDQIYKLSNWFFEQ	LDQIY(Oxidation)KLSNW(Oxidation)FFEQ	-	T20170314-11	70.828	15.4	0.0013
[3]	TDP187
[3]	TDP187																																													479.209	2	386099	=-LDQIYKL
[3]	TDP187																																													535.751	2	15235	=-LDQIYK
[4]	TDP83
[4]	TDP83
[4]	TDP83
[4]	TDP83												776.419	2	452678	-	APSLIAKWVGFEPH	APSLIAKWVGFEPH	-	T20170314-06	60.257	48.3	1.3e-12
[4]	TDP83
[4]	TDP83
[4]	TDP83
[4]	TDP83	776.419	2	1920000	-	APSLIAKWVGFEPH	APSLIAKWVGFEPH	-	T20170314-04	60.093	47.6	2.9e-12
[4]	TDP83
[4]	TDP83
[4]	TDP83
[4]	TDP83
[4]	TDP83	776.42	2	70637	-	APSLIAKWVGFEPH	APSLIAKWVGFEPH	-	T20170314-04	60.445	53.3	5.2e-12
[4]	TDP83
[4]	TDP83
[4]	TDP83
[4]	TDP83
[4]	TDP83
[4]	TDP83
[4]	TDP83												776.42	2	13210	-	APSLIAKWVGFEPH	APSLIAKWVGFEPH	-	T20170314-06	60.62	45.4	2e-11
[4]	TDP83
[4]	TDP83
[4]	TDP83
[4]	TDP83																																		776.419	2	686566	-	APSLIAKWVGFEPH	APSLIAKWVGFEPH	-	T20170314-11	60.923	46.3	2.7e-11
[4]	TDP83																																		776.418	2	92001	-	APSLIAKWVGFEPH	APSLIAKWVGFEPH	-	T20170314-11	61.268	43.6	3.7e-11
[4]	TDP83																																		776.418	2	92001	-	APSLIAKWVGFEPH	APSLIAKWVGFEPH	-	T20170314-11	61.268	43.6	3.7e-11
[4]	TDP83
[4]	TDP83	776.42	2	37432	-	APSLIAKWVGFEPH	APSLIAKWVGFEPH	-	T20170314-04	59.738	47.8	4.3e-11
[4]	TDP83												776.42	2	16410	-	APSLIAKWVGFEPH	APSLIAKWVGFEPH	-	T20170314-06	59.916	44.8	6.9e-11
[4]	TDP83																																		776.418	2	286071	-	APSLIAKWVGFEPH	APSLIAKWVGFEPH	-	T20170314-11	60.579	49.4	8.2e-11
[4]	TDP83	740.902	2	12507	=-A	PSLIAKWVGFEPH	PSLIAKWVGFEPH	-	T20170314-04	58.701	40.5	1.1e-10
[4]	TDP83	776.421	2	14983	-	APSLIAKWVGFEPH	APSLIAKWVGFEPH	-	T20170314-04	61.184	41	1.2e-10
[4]	TDP83
[4]	TDP83
[4]	TDP83
[4]	TDP83
[4]	TDP83
[4]	TDP83
[4]	TDP83																																													776.419	2	10873	-
[4]	TDP83
[4]	TDP83
[4]	TDP83
[4]	TDP83																																		776.421	2	4150	-	APSLIAKWVGFEPH	APSLIAKWVGFEPH	-	T20170314-11	60.253	38.2	2.4e-09
[4]	TDP83
[4]	TDP83
[4]	TDP83																																		517.949	3	46276	-	APSLIAKWVGFEPH	APSLIAKWVGFEPH	-	T20170314-11	60.225	30.6	4.7e-09
[4]	TDP83
[4]	TDP83	517.949	3	95656	-	APSLIAKWVGFEPH	APSLIAKWVGFEPH	-	T20170314-04	59.706	31.2	1e-08
[4]	TDP83	517.948	3	69221	-	APSLIAKWVGFEPH	APSLIAKWVGFEPH	-	T20170314-04	61.326	32.5	1.2e-08
[4]	TDP83	776.42	2	5020	-	APSLIAKWVGFEPH	APSLIAKWVGFEPH	-	T20170314-04	62.112	32.6	1.3e-08
[4]	TDP83
[4]	TDP83	517.95	3	534539	-	APSLIAKWVGFEPH	APSLIAKWVGFEPH	-	T20170314-04	60.441	40	1.5e-08
[4]	TDP83
[4]	TDP83
[4]	TDP83																																		517.949	3	235237	-	APSLIAKWVGFEPH	APSLIAKWVGFEPH	-	T20170314-11	61.262	36.2	1.8e-08
[4]	TDP83
[4]	TDP83
[4]	TDP83
[4]	TDP83																																													776.419	2	4405	-
[4]	TDP83
[4]	TDP83
[4]	TDP83																																													517.948	3	135658	-
[4]	TDP83
[4]	TDP83
[4]	TDP83
[4]	TDP83																																		517.949	3	4530000	-	APSLIAKWVGFEPH	APSLIAKWVGFEPH	-	T20170314-11	60.915	31.4	3.1e-08
[4]	TDP83												517.949	3	149642	-	APSLIAKWVGFEPH	APSLIAKWVGFEPH	-	T20170314-06	60.603	33.1	3.5e-08
[4]	TDP83
[4]	TDP83	517.949	3	45491	-	APSLIAKWVGFEPH	APSLIAKWVGFEPH	-	T20170314-04	61.674	29.8	4.7e-08
[4]	TDP83
[4]	TDP83												494.27	3	65088	=-A	PSLIAKWVGFEPH	PSLIAKWVGFEPH	-	T20170314-06	58.845	34.6	4.9e-08
[4]	TDP83
[4]	TDP83
[4]	TDP83
[4]	TDP83
[4]	TDP83												517.95	3	3700000	-	APSLIAKWVGFEPH	APSLIAKWVGFEPH	-	T20170314-06	60.221	32.8	6.9e-08
[4]	TDP83	692.374	2	15347	=-AP	SLIAKWVGFEPH	SLIAKWVGFEPH	-	T20170314-04	56.478	33.5	7e-08
[4]	TDP83
[4]	TDP83
[4]	TDP83
[4]	TDP83
[4]	TDP83
[4]	TDP83	517.951	3	10400000	-	APSLIAKWVGFEPH	APSLIAKWVGFEPH	-	T20170314-04	60.064	31.7	1.2e-07
[4]	TDP83	494.27	3	114314	=-A	PSLIAKWVGFEPH	PSLIAKWVGFEPH	-	T20170314-04	58.596	31.1	1.2e-07
[4]	TDP83
[4]	TDP83
[4]	TDP83
[4]	TDP83
[4]	TDP83
[4]	TDP83												350.224	2	9013	-	APSLIAK	APSLIAK	WVGFEPH-	T20170314-06	20.616	22.7	1.6e-07
[4]	TDP83
[4]	TDP83
[4]	TDP83
[4]	TDP83																																		517.95	3	2090000	-	APSLIAKWVGFEPH	APSLIAKWVGFEPH	-	T20170314-11	60.575	29.2	1.9e-07
[4]	TDP83
[4]	TDP83
[4]	TDP83
[4]	TDP83
[4]	TDP83	517.949	3	55906	-	APSLIAKWVGFEPH	APSLIAKWVGFEPH	-	T20170314-05	60.139	29.3	3.9e-07
[4]	TDP83
[4]	TDP83
[4]	TDP83
[4]	TDP83
[4]	TDP83
[4]	TDP83																																		494.27	3	62182	=-A	PSLIAKWVGFEPH	PSLIAKWVGFEPH	-	T20170314-11	59.601	31.3	7.2e-07
[4]	TDP83
[4]	TDP83
[4]	TDP83
[4]	TDP83	776.42	2	5998	-	APSLIAKWVGFEPH	APSLIAKWVGFEPH	-	T20170314-04	61.557	23	9.3e-07
[4]	TDP83
[4]	TDP83
[4]	TDP83
[4]	TDP83																																													500.257	2	15463	=-APSLIA
[4]	TDP83
[4]	TDP83												350.224	2	51859	-	APSLIAK	APSLIAK	WVGFEPH-	T20170314-06	32.039	29.1	1.3e-06
[4]	TDP83
[4]	TDP83																																													350.222	2	315376	-
[4]	TDP83
[4]	TDP83
[4]	TDP83																							350.224	2	56973	-	APSLIAK	APSLIAK	WVGFEPH-	T20170314-08	28.105	27.7	1.5e-06
[4]	TDP83
[4]	TDP83
[4]	TDP83																							350.22	2	180955	-	APSLIAK	APSLIAK	WVGFEPH-	T20170314-08	29.885	29.4	1.8e-06
[4]	TDP83																							350.223	2	512071	-	APSLIAK	APSLIAK	WVGFEPH-	T20170314-08	30.264	28.5	1.9e-06
[4]	TDP83																							350.225	2	20926	-	APSLIAK	APSLIAK	WVGFEPH-	T20170314-08	32.005	27.4	2e-06
[4]	TDP83
[4]	TDP83																																													350.224	2	111133	-
[4]	TDP83
[4]	TDP83												350.224	2	192502	-	APSLIAK	APSLIAK	WVGFEPH-	T20170314-06	31.336	30.2	2.2e-06
[4]	TDP83												350.225	2	50193	-	APSLIAK	APSLIAK	WVGFEPH-	T20170314-06	31.697	28.5	2.3e-06
[4]	TDP83
[4]	TDP83																																		350.224	2	2220000	-	APSLIAK	APSLIAK	WVGFEPH-	T20170314-11	30.296	31	2.4e-06
[4]	TDP83												350.223	2	123975	-	APSLIAK	APSLIAK	WVGFEPH-	T20170314-06	29.883	26.5	2.6e-06
[4]	TDP83																																		350.224	2	90361	-	APSLIAK	APSLIAK	WVGFEPH-	T20170314-11	28.504	22	2.6e-06
[4]	TDP83	494.27	3	24612	=-A	PSLIAKWVGFEPH	PSLIAKWVGFEPH	-	T20170314-04	60.103	25.8	2.6e-06
[4]	TDP83	461.919	3	40571	=-AP	SLIAKWVGFEPH	SLIAKWVGFEPH	-	T20170314-04	56.376	26.8	2.7e-06
[4]	TDP83																							350.224	2	109387	-	APSLIAK	APSLIAK	WVGFEPH-	T20170314-08	28.47	30.5	2.7e-06
[4]	TDP83
[4]	TDP83												350.223	2	55259	-	APSLIAK	APSLIAK	WVGFEPH-	T20170314-06	28.836	25.7	2.4e-05	350.224	2	141100	-	APSLIAK	APSLIAK	WVGFEPH-	T20170314-08	28.836	28.1	2.9e-06
[4]	TDP83												350.223	2	55259	-	APSLIAK	APSLIAK	WVGFEPH-	T20170314-06	28.836	25.7	2.4e-05	350.224	2	141100	-	APSLIAK	APSLIAK	WVGFEPH-	T20170314-08	28.836	28.1	2.9e-06
[4]	TDP83
[4]	TDP83
[4]	TDP83
[4]	TDP83												350.224	2	10114	-	APSLIAK	APSLIAK	WVGFEPH-	T20170314-06	21.723	20.6	3.3e-06
[4]	TDP83												350.223	2	436952	-	APSLIAK	APSLIAK	WVGFEPH-	T20170314-06	30.6	28.8	3.3e-06
[4]	TDP83																																													350.224	2	62909	-
[4]	TDP83												350.224	2	12300	-	APSLIAK	APSLIAK	WVGFEPH-	T20170314-06	24.973	23.6	3.7e-06
[4]	TDP83																							350.224	2	2850000	-	APSLIAK	APSLIAK	WVGFEPH-	T20170314-08	30.618	30.2	3.7e-06
[4]	TDP83
[4]	TDP83												350.222	2	201855	-	APSLIAK	APSLIAK	WVGFEPH-	T20170314-06	30.243	28.9	3.8e-06
[4]	TDP83																							350.224	2	192242	-	APSLIAK	APSLIAK	WVGFEPH-	T20170314-08	30.963	29.5	3.8e-06
[4]	TDP83																																													350.224	2	101900	-
[4]	TDP83
[4]	TDP83																																													350.224	2	1260000	-
[4]	TDP83
[4]	TDP83																							500.257	2	8456	=-APSLIA	KWVGFEPH	KWVGFEPH	-	T20170314-08	37.996	23.8	4.3e-06
[4]	TDP83
[4]	TDP83
[4]	TDP83												350.223	2	36584	-	APSLIAK	APSLIAK	WVGFEPH-	T20170314-06	27.766	18.9	4.5e-06
[4]	TDP83																																		436.209	2	848685	=-APSLIAK	WVGFEPH	WVGFEPH	-	T20170314-11	45.308	21	4.6e-06
[4]	TDP83																																													350.224	2	41034	-
[4]	TDP83
[4]	TDP83												350.224	2	33193	-	APSLIAK	APSLIAK	WVGFEPH-	T20170314-06	28.123	23.9	4.7e-06
[4]	TDP83												350.224	2	2370000	-	APSLIAK	APSLIAK	WVGFEPH-	T20170314-06	30.954	28.2	4.8e-06
[4]	TDP83
[4]	TDP83																																		350.224	2	45671	-	APSLIAK	APSLIAK	WVGFEPH-	T20170314-11	31.019	28.2	5e-06
[4]	TDP83	350.224	2	214331	-	APSLIAK	APSLIAK	WVGFEPH-	T20170314-04	31.006	29.8	5.2e-06
[4]	TDP83
[4]	TDP83
[4]	TDP83												350.224	2	3891	-	APSLIAK	APSLIAK	WVGFEPH-	T20170314-06	16.556	20.8	5.2e-06
[4]	TDP83																																		350.225	2	51452	-	APSLIAK	APSLIAK	WVGFEPH-	T20170314-11	28.159	23.8	5.2e-06
[4]	TDP83																																		350.222	2	390089	-	APSLIAK	APSLIAK	WVGFEPH-	T20170314-11	29.947	29.3	5.4e-06
[4]	TDP83																							436.209	2	1760000	=-APSLIAK	WVGFEPH	WVGFEPH	-	T20170314-08	45.778	24.8	5.5e-06
[4]	TDP83												350.224	2	72757	-	APSLIAK	APSLIAK	WVGFEPH-	T20170314-06	29.178	21.9	5.5e-06
[4]	TDP83
[4]	TDP83												350.224	2	18023	-	APSLIAK	APSLIAK	WVGFEPH-	T20170314-06	32.408	17.2	5.7e-06
[4]	TDP83
[4]	TDP83												350.224	2	5828	-	APSLIAK	APSLIAK	WVGFEPH-	T20170314-06	19.34	24.4	5.9e-06
[4]	TDP83
[4]	TDP83																																													436.21	2	10300000	=-APSLIAK
[4]	TDP83																																		500.256	2	14445	=-APSLIA	KWVGFEPH	KWVGFEPH	-	T20170314-11	37.723	21.7	6.4e-06
[4]	TDP83																																		350.224	2	232505	-	APSLIAK	APSLIAK	WVGFEPH-	T20170314-11	30.647	30.6	6.4e-06
[4]	TDP83																							350.222	2	120456	-	APSLIAK	APSLIAK	WVGFEPH-	T20170314-08	29.54	25.8	6.5e-06
[4]	TDP83																																													350.224	2	521062	-
[4]	TDP83
[4]	TDP83
[4]	TDP83																																		436.211	2	13600000	=-APSLIAK	WVGFEPH	WVGFEPH	-	T20170314-11	44.931	21.5	7.3e-06
[4]	TDP83												350.224	2	10875	-	APSLIAK	APSLIAK	WVGFEPH-	T20170314-06	14.036	21.7	7.3e-06
[4]	TDP83												350.223	2	37071	-	APSLIAK	APSLIAK	WVGFEPH-	T20170314-06	28.496	28.9	7.5e-06
[4]	TDP83												517.949	3	47282	-	APSLIAKWVGFEPH	APSLIAKWVGFEPH	-	T20170314-06	59.855	25.1	7.6e-06
[4]	TDP83
[4]	TDP83	350.224	2	280224	-	APSLIAK	APSLIAK	WVGFEPH-	T20170314-04	30.649	28.8	8.2e-06
[4]	TDP83																																		494.271	3	10808	=-A	PSLIAKWVGFEPH	PSLIAKWVGFEPH	-	T20170314-11	59.971	22.4	8.8e-06
[4]	TDP83
[4]	TDP83
[4]	TDP83
[4]	TDP83												350.223	2	23475	-	APSLIAK	APSLIAK	WVGFEPH-	T20170314-06	27.417	28.6	9.4e-06
[4]	TDP83												350.224	2	3813	-	APSLIAK	APSLIAK	WVGFEPH-	T20170314-06	19.002	21	1e-05
[4]	TDP83																																		350.22	2	144010	-	APSLIAK	APSLIAK	WVGFEPH-	T20170314-11	29.567	29.1	1e-05
[4]	TDP83																																		350.224	2	120453	-	APSLIAK	APSLIAK	WVGFEPH-	T20170314-11	28.858	25.6	7e-05
[4]	TDP83																																		350.224	2	120453	-	APSLIAK	APSLIAK	WVGFEPH-	T20170314-11	28.858	25.6	7e-05
[4]	TDP83												350.224	2	9893	-	APSLIAK	APSLIAK	WVGFEPH-	T20170314-06	23.111	20.7	1.1e-05
[4]	TDP83																																		350.224	2	36413	-	APSLIAK	APSLIAK	WVGFEPH-	T20170314-11	27.82	27	1.1e-05
[4]	TDP83																							523.278	3	27282	-	APSLIAKWVGFEPH	APSLIAKW(Oxidation)VGFEPH	-	T20170314-08	51.908	21.8	1.2e-05
[4]	TDP83																																		395.213	3	31953	=-APSL	IAKWVGFEPH	IAKWVGFEPH	-	T20170314-11	43.687	23.6	1.2e-05
[4]	TDP83
[4]	TDP83
[4]	TDP83	350.224	2	16765	-	APSLIAK	APSLIAK	WVGFEPH-	T20170314-04	29.219	21.3	5.1e-05																							350.225	2	112505	-	APSLIAK	APSLIAK	WVGFEPH-	T20170314-11	29.219	26.5	1.3e-05
[4]	TDP83	350.224	2	16765	-	APSLIAK	APSLIAK	WVGFEPH-	T20170314-04	29.219	21.3	5.1e-05																							350.225	2	112505	-	APSLIAK	APSLIAK	WVGFEPH-	T20170314-11	29.219	26.5	1.3e-05
[4]	TDP83
[4]	TDP83
[4]	TDP83
[4]	TDP83
[4]	TDP83																																													350.219	2	232976	-
[4]	TDP83																							436.208	2	59263	=-APSLIAK	WVGFEPH	WVGFEPH	-	T20170314-08	45.056	21	1.6e-05
[4]	TDP83												350.224	2	7323	-	APSLIAK	APSLIAK	WVGFEPH-	T20170314-06	13.594	20.5	1.6e-05
[4]	TDP83
[4]	TDP83																																		494.271	3	11161	=-A	PSLIAKWVGFEPH	PSLIAKWVGFEPH	-	T20170314-11	59.268	17.8	0.00034
[4]	TDP83																																		494.271	3	11161	=-A	PSLIAKWVGFEPH	PSLIAKWVGFEPH	-	T20170314-11	59.268	17.8	0.00034
[4]	TDP83																																													436.209	2	1300000	=-APSLIAK
[4]	TDP83	350.225	2	10698	-	APSLIAK	APSLIAK	WVGFEPH-	T20170314-04	28.528	21	1.8e-05
[4]	TDP83
[4]	TDP83																																													395.213	3	52710	=-APSL
[4]	TDP83																							350.224	2	169959	-	APSLIAK	APSLIAK	WVGFEPH-	T20170314-08	29.198	27.8	1.9e-05
[4]	TDP83	350.224	2	8107	-	APSLIAK	APSLIAK	WVGFEPH-	T20170314-04	31.774	17	2e-05
[4]	TDP83												436.209	2	1100000	=-APSLIAK	WVGFEPH	WVGFEPH	-	T20170314-06	45.693	21	2e-05
[4]	TDP83
[4]	TDP83
[4]	TDP83												350.224	2	10068	-	APSLIAK	APSLIAK	WVGFEPH-	T20170314-06	22.773	23.6	2.2e-05
[4]	TDP83																																		517.949	3	45982	-	APSLIAKWVGFEPH	APSLIAKWVGFEPH	-	T20170314-12	59.987	21.9	2.3e-05
[4]	TDP83																																		517.948	3	52792	-	APSLIAKWVGFEPH	APSLIAKWVGFEPH	-	T20170314-11	61.979	19.1	2.3e-05
[4]	TDP83
[4]	TDP83																																													350.224	2	19998	-
[4]	TDP83												350.224	2	10302	-	APSLIAK	APSLIAK	WVGFEPH-	T20170314-06	22.414	19.7	2.4e-05
[4]	TDP83
[4]	TDP83																																													436.209	2	179764	=-APSLIAK
[4]	TDP83
[4]	TDP83																																													395.214	3	48334	=-APSL
[4]	TDP83
[4]	TDP83
[4]	TDP83																																													350.223	2	6451	-
[4]	TDP83												350.223	2	95154	-	APSLIAK	APSLIAK	WVGFEPH-	T20170314-06	29.532	23.7	2.8e-05
[4]	TDP83	517.95	3	137755	-	APSLIAKWVGFEPH	APSLIAKWVGFEPH	-	T20170314-04	60.946	19	2.8e-05
[4]	TDP83																																		523.283	3	18099	-	APSLIAKWVGFEPH	APSLIAKW(Oxidation)VGFEPH	-	T20170314-11	53.894	21.7	2.9e-05
[4]	TDP83												436.209	2	750235	=-APSLIAK	WVGFEPH	WVGFEPH	-	T20170314-06	46.075	21	3e-05
[4]	TDP83
[4]	TDP83	350.222	2	20758	-	APSLIAK	APSLIAK	WVGFEPH-	T20170314-04	29.919	25.9	3e-05
[4]	TDP83																																													350.224	2	137613	-
[4]	TDP83
[4]	TDP83
[4]	TDP83												350.224	2	10803	-	APSLIAK	APSLIAK	WVGFEPH-	T20170314-06	14.737	16.8	3.1e-05
[4]	TDP83												350.224	2	6405	-	APSLIAK	APSLIAK	WVGFEPH-	T20170314-06	12.862	17.6	3.3e-05
[4]	TDP83	350.223	2	54577	-	APSLIAK	APSLIAK	WVGFEPH-	T20170314-04	30.307	27.6	3.4e-05
[4]	TDP83																																													523.279	3	15306	-
[4]	TDP83
[4]	TDP83	350.225	2	5995	-	APSLIAK	APSLIAK	WVGFEPH-	T20170314-04	28.178	22.4	3.8e-05
[4]	TDP83												350.224	2	14952	-	APSLIAK	APSLIAK	WVGFEPH-	T20170314-06	23.818	20.2	3.8e-05
[4]	TDP83
[4]	TDP83
[4]	TDP83
[4]	TDP83	436.209	2	434005	=-APSLIAK	WVGFEPH	WVGFEPH	-	T20170314-04	45.399	21.4	3.9e-05
[4]	TDP83
[4]	TDP83
[4]	TDP83
[4]	TDP83
[4]	TDP83																																													350.224	2	61039	-
[4]	TDP83
[4]	TDP83												350.224	2	10259	-	APSLIAK	APSLIAK	WVGFEPH-	T20170314-06	19.922	20.2	4.5e-05
[4]	TDP83
[4]	TDP83
[4]	TDP83
[4]	TDP83
[4]	TDP83
[4]	TDP83												350.224	2	10029	-	APSLIAK	APSLIAK	WVGFEPH-	T20170314-06	22.072	19.2	5.3e-05
[4]	TDP83																																													592.316	2	25755	=-APSL
[4]	TDP83
[4]	TDP83
[4]	TDP83	494.27	3	15246	=-A	PSLIAKWVGFEPH	PSLIAKWVGFEPH	-	T20170314-04	58.988	19.3	5.8e-05
[4]	TDP83												350.224	2	8442	-	APSLIAK	APSLIAK	WVGFEPH-	T20170314-06	20.269	16.4	5.9e-05
[4]	TDP83												350.224	2	12134	-	APSLIAK	APSLIAK	WVGFEPH-	T20170314-06	24.156	19.2	6e-05
[4]	TDP83
[4]	TDP83
[4]	TDP83												523.28	3	29028	-	APSLIAKWVGFEPH	APSLIAKW(Oxidation)VGFEPH	-	T20170314-06	52.474	19.4	6.4e-05
[4]	TDP83
[4]	TDP83												350.224	2	8296	-	APSLIAK	APSLIAK	WVGFEPH-	T20170314-06	15.088	18.7	6.5e-05
[4]	TDP83																							350.224	2	46795	-	APSLIAK	APSLIAK	WVGFEPH-	T20170314-08	31.648	19.3	6.8e-05
[4]	TDP83																																													500.256	2	5949	=-APSLIA
[4]	TDP83
[4]	TDP83												350.224	2	11083	-	APSLIAK	APSLIAK	WVGFEPH-	T20170314-06	20.964	17.4	7.3e-05
[4]	TDP83												350.224	2	13170	-	APSLIAK	APSLIAK	WVGFEPH-	T20170314-06	24.591	15.5	7.4e-05
[4]	TDP83
[4]	TDP83
[4]	TDP83
[4]	TDP83												350.224	2	5345	-	APSLIAK	APSLIAK	WVGFEPH-	T20170314-06	12.16	19.2	8.6e-05
[4]	TDP83	350.223	2	12512	-	APSLIAK	APSLIAK	WVGFEPH-	T20170314-04	31.375	18.5	8.8e-05																							350.224	2	30351	-	APSLIAK	APSLIAK	WVGFEPH-	T20170314-11	31.375	17.4	0.00015
[4]	TDP83	350.223	2	12512	-	APSLIAK	APSLIAK	WVGFEPH-	T20170314-04	31.375	18.5	8.8e-05																							350.224	2	30351	-	APSLIAK	APSLIAK	WVGFEPH-	T20170314-11	31.375	17.4	0.00015
[4]	TDP83
[4]	TDP83												350.224	2	6268	-	APSLIAK	APSLIAK	WVGFEPH-	T20170314-06	13.231	19.4	9.1e-05
[4]	TDP83
[4]	TDP83
[4]	TDP83																							350.223	2	91360	-	APSLIAK	APSLIAK	WVGFEPH-	T20170314-08	31.301	18.1	0.00013
[4]	TDP83
[4]	TDP83
[4]	TDP83												350.224	2	8751	-	APSLIAK	APSLIAK	WVGFEPH-	T20170314-06	21.38	18.4	0.00014
[4]	TDP83
[4]	TDP83
[4]	TDP83
[4]	TDP83
[4]	TDP83												461.919	3	43654	=-AP	SLIAKWVGFEPH	SLIAKWVGFEPH	-	T20170314-06	56.803	17.6	0.0002
[4]	TDP83																																		517.949	3	140903	-	APSLIAKWVGFEPH	APSLIAKWVGFEPH	-	T20170314-11	61.622	16.7	0.0002
[4]	TDP83
[4]	TDP83
[4]	TDP83
[4]	TDP83																							436.21	2	4500000	=-APSLIAK	WVGFEPH	WVGFEPH	-	T20170314-08	45.42	20.7	0.00024
[4]	TDP83												350.224	2	7942	-	APSLIAK	APSLIAK	WVGFEPH-	T20170314-06	15.434	19.4	0.00025
[4]	TDP83																																		494.271	3	10593	=-A	PSLIAKWVGFEPH	PSLIAKWVGFEPH	-	T20170314-11	60.901	15	0.00028
[4]	TDP83
[4]	TDP83												436.208	2	327180	=-APSLIAK	WVGFEPH	WVGFEPH	-	T20170314-06	46.425	16.8	0.00034
[4]	TDP83																																													350.225	2	15203	-
[4]	TDP83
[4]	TDP83
[4]	TDP83
[4]	TDP83																																		523.285	3	44015	-	APSLIAKWVGFEPH	APSLIAKW(Oxidation)VGFEPH	-	T20170314-11	51.943	16.7	0.00055
[4]	TDP83
[4]	TDP83
[4]	TDP83
[4]	TDP83
[4]	TDP83
[4]	TDP83																																		350.225	2	12597	-	APSLIAK	APSLIAK	WVGFEPH-	T20170314-11	31.821	15.1	0.0015
[4]	TDP83																							395.213	3	11345	=-APSL	IAKWVGFEPH	IAKWVGFEPH	-	T20170314-08	44.142	15.7	0.0074
[5]	TDP203
[5]	TDP203
[5]	TDP203
[5]	TDP203	924.471	2	36508	-	WWYHYGPTVNKQLR	WWYHYGPTVNKQLR	-	T20170314-05	45.211	39.3	4.4e-10
[5]	TDP203
[5]	TDP203
[5]	TDP203
[5]	TDP203												924.467	2	20153	-	WWYHYGPTVNKQLR	WWYHYGPTVNKQLR	-	T20170314-07	45.318	42.1	2.1e-09
[5]	TDP203																																		725.847	2	933937	-	WWYHYGPTVNK	WWYHYGPTVNK	QLR-	T20170314-12	45.757	40.2	1e-08
[5]	TDP203
[5]	TDP203																																													725.847	2	1060000	-
[5]	TDP203												725.848	2	75804	-	WWYHYGPTVNK	WWYHYGPTVNK	QLR-	T20170314-07	46.726	34.6	2e-08
[5]	TDP203
[5]	TDP203
[5]	TDP203												725.848	2	26207	-	WWYHYGPTVNK	WWYHYGPTVNK	QLR-	T20170314-07	46.389	35.8	2.7e-08
[5]	TDP203
[5]	TDP203
[5]	TDP203
[5]	TDP203
[5]	TDP203	725.846	2	16584	-	WWYHYGPTVNK	WWYHYGPTVNK	QLR-	T20170314-05	46.379	35.6	8.1e-08
[5]	TDP203																																		725.849	2	119288	-	WWYHYGPTVNK	WWYHYGPTVNK	QLR-	T20170314-12	45.404	36	8.4e-08
[5]	TDP203																							725.848	2	15051	-	WWYHYGPTVNK	WWYHYGPTVNK	QLR-	T20170314-09	46.131	39	1.1e-07
[5]	TDP203
[5]	TDP203
[5]	TDP203																																													725.848	2	26533	-
[5]	TDP203
[5]	TDP203
[5]	TDP203																							725.848	2	1230000	-	WWYHYGPTVNK	WWYHYGPTVNK	QLR-	T20170314-09	46.46	37.5	1.8e-07
[5]	TDP203
[5]	TDP203																																		924.47	2	7262	-	WWYHYGPTVNKQLR	WWYHYGPTVNKQLR	-	T20170314-12	44.617	25.6	2.2e-07
[5]	TDP203
[5]	TDP203
[5]	TDP203																																		616.648	3	777141	-	WWYHYGPTVNKQLR	WWYHYGPTVNKQLR	-	T20170314-12	44.646	26.4	2.6e-07
[5]	TDP203
[5]	TDP203
[5]	TDP203
[5]	TDP203
[5]	TDP203	616.648	3	1550000	-	WWYHYGPTVNKQLR	WWYHYGPTVNKQLR	-	T20170314-05	45.445	26.5	3.1e-07
[5]	TDP203
[5]	TDP203																																													725.849	2	138946	-
[5]	TDP203
[5]	TDP203
[5]	TDP203
[5]	TDP203
[5]	TDP203
[5]	TDP203																																		616.647	3	15050	-	WWYHYGPTVNKQLR	WWYHYGPTVNKQLR	-	T20170314-12	44.308	24.1	5.2e-07
[5]	TDP203
[5]	TDP203
[5]	TDP203
[5]	TDP203	616.65	3	242063	-	WWYHYGPTVNKQLR	WWYHYGPTVNKQLR	-	T20170314-04	45.059	24.9	5.9e-07
[5]	TDP203
[5]	TDP203
[5]	TDP203	616.649	3	55029	-	WWYHYGPTVNKQLR	WWYHYGPTVNKQLR	-	T20170314-05	46.198	26.7	8.2e-07
[5]	TDP203
[5]	TDP203																							616.65	3	302232	-	WWYHYGPTVNKQLR	WWYHYGPTVNKQLR	-	T20170314-08	44.909	26.2	8.9e-07
[5]	TDP203
[5]	TDP203
[5]	TDP203
[5]	TDP203
[5]	TDP203																																		616.648	3	128397	-	WWYHYGPTVNKQLR	WWYHYGPTVNKQLR	-	T20170314-12	45.002	23.8	1.2e-06
[5]	TDP203
[5]	TDP203
[5]	TDP203
[5]	TDP203
[5]	TDP203																							616.648	3	24738	-	WWYHYGPTVNKQLR	WWYHYGPTVNKQLR	-	T20170314-09	45.143	26.3	1.5e-06
[5]	TDP203	616.649	3	33882	-	WWYHYGPTVNKQLR	WWYHYGPTVNKQLR	-	T20170314-05	46.554	24.3	1.6e-06
[5]	TDP203																							616.648	3	28735	-	WWYHYGPTVNKQLR	WWYHYGPTVNKQLR	-	T20170314-09	45.853	22.8	1.6e-06
[5]	TDP203
[5]	TDP203												462.739	4	340234	-	WWYHYGPTVNKQLR	WWYHYGPTVNKQLR	-	T20170314-06	45.498	28.4	1.7e-06
[5]	TDP203	616.649	3	30892	-	WWYHYGPTVNKQLR	WWYHYGPTVNKQLR	-	T20170314-05	45.115	23.4	1.7e-06
[5]	TDP203																							789.877	2	31861	-	WWYHYGPTVNKQ	WWYHYGPTVNKQ	LR-	T20170314-09	46.044	30.4	1.8e-06
[5]	TDP203
[5]	TDP203
[5]	TDP203
[5]	TDP203
[5]	TDP203
[5]	TDP203
[5]	TDP203
[5]	TDP203
[5]	TDP203
[5]	TDP203
[5]	TDP203
[5]	TDP203
[5]	TDP203
[5]	TDP203
[5]	TDP203												616.648	3	58847	-	WWYHYGPTVNKQLR	WWYHYGPTVNKQLR	-	T20170314-07	45.234	24.4	2.3e-06
[5]	TDP203																																		462.74	4	2410000	-	WWYHYGPTVNKQLR	WWYHYGPTVNKQLR	-	T20170314-12	44.642	27.7	2.4e-06
[5]	TDP203
[5]	TDP203
[5]	TDP203
[5]	TDP203																																													616.651	3	49874	-
[5]	TDP203
[5]	TDP203
[5]	TDP203												616.648	3	121147	-	WWYHYGPTVNKQLR	WWYHYGPTVNKQLR	-	T20170314-07	45.967	23.4	2.7e-06
[5]	TDP203	616.648	3	145754	-	WWYHYGPTVNKQLR	WWYHYGPTVNKQLR	-	T20170314-05	45.821	25	2.9e-06
[5]	TDP203	616.648	3	12469	-	WWYHYGPTVNKQLR	WWYHYGPTVNKQLR	-	T20170314-05	48.059	22.3	2.9e-06
[5]	TDP203
[5]	TDP203
[5]	TDP203																																													616.648	3	41866	-
[5]	TDP203
[5]	TDP203
[5]	TDP203
[5]	TDP203
[5]	TDP203
[5]	TDP203
[5]	TDP203
[5]	TDP203
[5]	TDP203
[5]	TDP203
[5]	TDP203												462.74	4	3800000	-	WWYHYGPTVNKQLR	WWYHYGPTVNKQLR	-	T20170314-07	45.573	26.1	4.6e-06
[5]	TDP203	462.739	4	238032	-	WWYHYGPTVNKQLR	WWYHYGPTVNKQLR	-	T20170314-05	46.187	28.1	4.6e-06
[5]	TDP203
[5]	TDP203
[5]	TDP203
[5]	TDP203																																													616.651	3	12829	-
[5]	TDP203
[5]	TDP203
[5]	TDP203
[5]	TDP203
[5]	TDP203	462.739	4	120198	-	WWYHYGPTVNKQLR	WWYHYGPTVNKQLR	-	T20170314-05	45.098	24.8	5.5e-06
[5]	TDP203
[5]	TDP203
[5]	TDP203												616.648	3	1130000	-	WWYHYGPTVNKQLR	WWYHYGPTVNKQLR	-	T20170314-07	45.577	23.2	5.7e-06
[5]	TDP203
[5]	TDP203												462.738	4	255245	-	WWYHYGPTVNKQLR	WWYHYGPTVNKQLR	-	T20170314-07	46.339	28.1	6.2e-06
[5]	TDP203
[5]	TDP203	462.739	4	145400	-	WWYHYGPTVNKQLR	WWYHYGPTVNKQLR	-	T20170314-05	46.869	25.7	6.3e-06
[5]	TDP203
[5]	TDP203
[5]	TDP203																																		462.739	4	8734	-	WWYHYGPTVNKQLR	WWYHYGPTVNKQLR	-	T20170314-12	84.928	22.4	6.7e-06
[5]	TDP203
[5]	TDP203
[5]	TDP203
[5]	TDP203
[5]	TDP203
[5]	TDP203	616.649	3	18644	-	WWYHYGPTVNKQLR	WWYHYGPTVNKQLR	-	T20170314-05	48.411	16.9	0.00025
[5]	TDP203	616.649	3	18644	-	WWYHYGPTVNKQLR	WWYHYGPTVNKQLR	-	T20170314-05	48.411	16.9	0.00025
[5]	TDP203
[5]	TDP203																																		616.647	3	34801	-	WWYHYGPTVNKQLR	WWYHYGPTVNKQLR	-	T20170314-12	45.444	22.7	8.3e-06
[5]	TDP203
[5]	TDP203																																		484.235	3	25585	-	WWYHYGPTVNK	WWYHYGPTVNK	QLR-	T20170314-12	59.095	26.5	9e-06
[5]	TDP203
[5]	TDP203
[5]	TDP203
[5]	TDP203
[5]	TDP203
[5]	TDP203
[5]	TDP203
[5]	TDP203
[5]	TDP203
[5]	TDP203
[5]	TDP203
[5]	TDP203
[5]	TDP203
[5]	TDP203																																		616.649	3	30322	-	WWYHYGPTVNKQLR	WWYHYGPTVNKQLR	-	T20170314-12	45.814	21.6	1.2e-05
[5]	TDP203	616.649	3	24251	-	WWYHYGPTVNKQLR	WWYHYGPTVNKQLR	-	T20170314-04	45.414	18.7	3.6e-05	616.65	3	149349	-	WWYHYGPTVNKQLR	WWYHYGPTVNKQLR	-	T20170314-06	45.414	19.8	1.2e-05
[5]	TDP203	616.649	3	24251	-	WWYHYGPTVNKQLR	WWYHYGPTVNKQLR	-	T20170314-04	45.414	18.7	3.6e-05	616.65	3	149349	-	WWYHYGPTVNKQLR	WWYHYGPTVNKQLR	-	T20170314-06	45.414	19.8	1.2e-05
[5]	TDP203
[5]	TDP203
[5]	TDP203												616.648	3	52284	-	WWYHYGPTVNKQLR	WWYHYGPTVNKQLR	-	T20170314-07	46.35	21.1	1.2e-05
[5]	TDP203
[5]	TDP203
[5]	TDP203
[5]	TDP203
[5]	TDP203
[5]	TDP203
[5]	TDP203
[5]	TDP203
[5]	TDP203	621.98	3	14374	-	WWYHYGPTVNKQLR	WW(Oxidation)YHYGPTVNKQLR	-	T20170314-05	43.7	22.3	1.6e-05
[5]	TDP203
[5]	TDP203
[5]	TDP203												462.739	4	67234	-	WWYHYGPTVNKQLR	WWYHYGPTVNKQLR	-	T20170314-07	45.194	25.9	1.7e-05
[5]	TDP203
[5]	TDP203
[5]	TDP203
[5]	TDP203
[5]	TDP203
[5]	TDP203
[5]	TDP203
[5]	TDP203	462.74	4	5050000	-	WWYHYGPTVNKQLR	WWYHYGPTVNKQLR	-	T20170314-05	45.441	25.7	2e-05
[5]	TDP203	462.739	4	196852	-	WWYHYGPTVNKQLR	WWYHYGPTVNKQLR	-	T20170314-04	45.253	23	2e-05
[5]	TDP203
[5]	TDP203
[5]	TDP203
[5]	TDP203
[5]	TDP203
[5]	TDP203												616.648	3	12197	-	WWYHYGPTVNKQLR	WWYHYGPTVNKQLR	-	T20170314-07	49.666	20.7	2.2e-05
[5]	TDP203
[5]	TDP203
[5]	TDP203																							616.648	3	222747	-	WWYHYGPTVNKQLR	WWYHYGPTVNKQLR	-	T20170314-09	45.496	21.8	2.3e-05
[5]	TDP203
[5]	TDP203												616.651	3	13470	-	WWYHYGPTVNKQLR	WWYHYGPTVNKQLR	-	T20170314-07	48.723	20.5	2.3e-05
[5]	TDP203																																													661.804	2	20593	-
[5]	TDP203	462.739	4	626138	-	WWYHYGPTVNKQLR	WWYHYGPTVNKQLR	-	T20170314-05	45.817	23.6	2.4e-05
[5]	TDP203
[5]	TDP203
[5]	TDP203
[5]	TDP203
[5]	TDP203
[5]	TDP203												462.739	4	42668	-	WWYHYGPTVNKQLR	WWYHYGPTVNKQLR	-	T20170314-07	50.873	22.7	2.6e-05
[5]	TDP203
[5]	TDP203
[5]	TDP203	466.738	4	60266	-	WWYHYGPTVNKQLR	WWY(Oxidation)HYGPTVNKQLR	-	T20170314-05	45.066	27	2.7e-05
[5]	TDP203
[5]	TDP203	462.738	4	44696	-	WWYHYGPTVNKQLR	WWYHYGPTVNKQLR	-	T20170314-05	51.199	23.4	2.8e-05
[5]	TDP203
[5]	TDP203																							462.739	4	972751	-	WWYHYGPTVNKQLR	WWYHYGPTVNKQLR	-	T20170314-09	45.447	24.7	2.9e-05
[5]	TDP203	462.738	4	47248	-	WWYHYGPTVNKQLR	WWYHYGPTVNKQLR	-	T20170314-04	45.64	28.5	2.9e-05
[5]	TDP203
[5]	TDP203
[5]	TDP203																																		462.739	4	141240	-	WWYHYGPTVNKQLR	WWYHYGPTVNKQLR	-	T20170314-12	45.355	22.2	3.1e-05
[5]	TDP203
[5]	TDP203
[5]	TDP203
[5]	TDP203																							616.651	3	12897	-	WWYHYGPTVNKQLR	WWYHYGPTVNKQLR	-	T20170314-08	45.304	20.8	3.2e-05
[5]	TDP203
[5]	TDP203
[5]	TDP203
[5]	TDP203
[5]	TDP203
[5]	TDP203												621.98	3	15061	-	WWYHYGPTVNKQLR	W(Oxidation)WYHYGPTVNKQLR	-	T20170314-07	43.776	20.9	3.9e-05
[5]	TDP203
[5]	TDP203
[5]	TDP203
[5]	TDP203																							484.234	3	10460	-	WWYHYGPTVNK	WWYHYGPTVNK	QLR-	T20170314-09	75.068	23.1	4.1e-05
[5]	TDP203
[5]	TDP203
[5]	TDP203	627.313	3	7719	-	WWYHYGPTVNKQLR	W(Oxidation)W(Oxidation)YHYGPTVNKQLR	-	T20170314-05	43.815	19.4	4.2e-05
[5]	TDP203																																													616.652	3	16598	-
[5]	TDP203
[5]	TDP203
[5]	TDP203												616.649	3	32159	-	WWYHYGPTVNKQLR	WWYHYGPTVNKQLR	-	T20170314-07	46.695	20.2	4.3e-05
[5]	TDP203
[5]	TDP203												462.739	4	194364	-	WWYHYGPTVNKQLR	WWYHYGPTVNKQLR	-	T20170314-07	46.678	22.8	4.5e-05
[5]	TDP203	616.649	3	12820	-	WWYHYGPTVNKQLR	WWYHYGPTVNKQLR	-	T20170314-05	49.259	19.7	4.7e-05
[5]	TDP203																																													526.923	3	54805	-
[5]	TDP203
[5]	TDP203																							466.737	4	35764	-	WWYHYGPTVNKQLR	WW(Oxidation)YHYGPTVNKQLR	-	T20170314-08	43.204	27.4	4.9e-05
[5]	TDP203	616.649	3	23967	-	WWYHYGPTVNKQLR	WWYHYGPTVNKQLR	-	T20170314-05	46.886	20.2	5e-05
[5]	TDP203												494.898	3	7372	-	WWYHYGPTVNK	W(Oxidation)W(Oxidation)YHYGPTVNK	QLR-	T20170314-07	44.36	24.7	5.1e-05
[5]	TDP203
[5]	TDP203																																		462.739	4	12160	-	WWYHYGPTVNKQLR	WWYHYGPTVNKQLR	-	T20170314-12	75.998	27.3	5.3e-05
[5]	TDP203																																													484.234	3	29944	-
[5]	TDP203
[5]	TDP203
[5]	TDP203
[5]	TDP203																																		462.741	4	20025	-	WWYHYGPTVNKQLR	WWYHYGPTVNKQLR	-	T20170314-12	48.84	22.9	5.9e-05
[5]	TDP203
[5]	TDP203	616.648	3	16911	-	WWYHYGPTVNKQLR	WWYHYGPTVNKQLR	-	T20170314-05	51.519	20.5	6e-05
[5]	TDP203
[5]	TDP203
[5]	TDP203
[5]	TDP203
[5]	TDP203	462.739	4	28920	-	WWYHYGPTVNKQLR	WWYHYGPTVNKQLR	-	T20170314-05	85.523	22	6.7e-05
[5]	TDP203
[5]	TDP203
[5]	TDP203																																		616.647	3	19044	-	WWYHYGPTVNKQLR	WWYHYGPTVNKQLR	-	T20170314-12	46.152	17.4	7e-05
[5]	TDP203												462.739	4	521808	-	WWYHYGPTVNKQLR	WWYHYGPTVNKQLR	-	T20170314-07	45.962	20.4	7e-05
[5]	TDP203																																													462.739	4	57913	-
[5]	TDP203																							462.738	4	367958	-	WWYHYGPTVNKQLR	WWYHYGPTVNKQLR	-	T20170314-08	45.006	23.6	7.2e-05
[5]	TDP203
[5]	TDP203
[5]	TDP203
[5]	TDP203	462.739	4	151779	-	WWYHYGPTVNKQLR	WWYHYGPTVNKQLR	-	T20170314-05	46.543	21.1	7.6e-05
[5]	TDP203
[5]	TDP203
[5]	TDP203
[5]	TDP203												616.65	3	44632	-	WWYHYGPTVNKQLR	WWYHYGPTVNKQLR	-	T20170314-07	47.068	20	8.3e-05
[5]	TDP203																																		484.236	3	7184	-	WWYHYGPTVNK	WWYHYGPTVNK	QLR-	T20170314-12	83.264	18.7	8.3e-05
[5]	TDP203
[5]	TDP203
[5]	TDP203																																		462.738	4	43676	-	WWYHYGPTVNKQLR	WWYHYGPTVNKQLR	-	T20170314-12	48.046	23.6	8.5e-05
[5]	TDP203
[5]	TDP203
[5]	TDP203
[5]	TDP203																																		462.739	4	409938	-	WWYHYGPTVNKQLR	WWYHYGPTVNKQLR	-	T20170314-12	44.992	20.2	9e-05
[5]	TDP203
[5]	TDP203
[5]	TDP203																																		616.65	3	14986	-	WWYHYGPTVNKQLR	WWYHYGPTVNKQLR	-	T20170314-12	46.516	17.2	9.2e-05
[5]	TDP203
[5]	TDP203
[5]	TDP203
[5]	TDP203																																		484.235	3	7780000	-	WWYHYGPTVNK	WWYHYGPTVNK	QLR-	T20170314-12	45.687	22.8	9.7e-05
[5]	TDP203	462.739	4	39089	-	WWYHYGPTVNKQLR	WWYHYGPTVNKQLR	-	T20170314-05	51.919	19.2	9.8e-05
[5]	TDP203
[5]	TDP203												526.923	3	12912	-	WWYHYGPTVNKQ	WWYHYGPTVNKQ	LR-	T20170314-07	46.123	21.6	0.0001
[5]	TDP203
[5]	TDP203												616.649	3	10840	-	WWYHYGPTVNKQLR	WWYHYGPTVNKQLR	-	T20170314-07	47.995	17	0.0001
[5]	TDP203	466.738	4	29303	-	WWYHYGPTVNKQLR	WWYHY(Oxidation)GPTVNKQLR	-	T20170314-05	44.103	22.8	0.0001
[5]	TDP203
[5]	TDP203
[5]	TDP203
[5]	TDP203
[5]	TDP203	462.739	4	46066	-	WWYHYGPTVNKQLR	WWYHYGPTVNKQLR	-	T20170314-05	49.399	21.3	0.00011
[5]	TDP203	616.648	3	15147	-	WWYHYGPTVNKQLR	WWYHYGPTVNKQLR	-	T20170314-05	52.812	20.2	0.00011
[5]	TDP203
[5]	TDP203												484.236	3	4280000	-	WWYHYGPTVNK	WWYHYGPTVNK	QLR-	T20170314-07	46.638	22.3	0.00011
[5]	TDP203												466.738	4	57277	-	WWYHYGPTVNKQLR	WW(Oxidation)YHYGPTVNKQLR	-	T20170314-07	43.764	25.2	0.00012
[5]	TDP203
[5]	TDP203												616.639	3	7690	-	WWYHYGPTVNKQLR	WWYHYGPTVNKQLR	-	T20170314-07	53.102	17.5	0.00012
[5]	TDP203																							489.566	3	17463	-	WWYHYGPTVNK	WWY(Oxidation)HYGPTVNK	QLR-	T20170314-09	44.602	19.8	0.00012
[5]	TDP203
[5]	TDP203																																													484.235	3	15500000	-
[5]	TDP203
[5]	TDP203
[5]	TDP203																																		489.567	3	34664	-	WWYHYGPTVNK	WWY(Oxidation)HYGPTVNK	QLR-	T20170314-12	43.284	22.4	0.00012
[5]	TDP203
[5]	TDP203																																													484.234	3	14722	-
[5]	TDP203
[5]	TDP203	484.235	3	473414	-	WWYHYGPTVNK	WWYHYGPTVNK	QLR-	T20170314-05	46.575	22.8	0.00013
[5]	TDP203
[5]	TDP203
[5]	TDP203
[5]	TDP203
[5]	TDP203												462.739	4	59538	-	WWYHYGPTVNKQLR	WWYHYGPTVNKQLR	-	T20170314-07	48.447	18.8	0.00013
[5]	TDP203
[5]	TDP203																							526.922	3	10283	-	WWYHYGPTVNKQ	WWYHYGPTVNKQ	LR-	T20170314-09	45.865	21.6	0.00013
[5]	TDP203
[5]	TDP203	462.739	4	76026	-	WWYHYGPTVNKQLR	WWYHYGPTVNKQLR	-	T20170314-05	48.339	24	0.00014
[5]	TDP203	462.74	4	87670	-	WWYHYGPTVNKQLR	WWYHYGPTVNKQLR	-	T20170314-05	47.606	22.9	0.00014
[5]	TDP203
[5]	TDP203																							484.235	3	9030	-	WWYHYGPTVNK	WWYHYGPTVNK	QLR-	T20170314-09	81.211	19.7	0.00014
[5]	TDP203
[5]	TDP203
[5]	TDP203
[5]	TDP203
[5]	TDP203
[5]	TDP203																																		462.739	4	13747	-	WWYHYGPTVNKQLR	WWYHYGPTVNKQLR	-	T20170314-12	67.951	24.4	0.00015
[5]	TDP203
[5]	TDP203
[5]	TDP203
[5]	TDP203
[5]	TDP203
[5]	TDP203																							484.235	3	30826	-	WWYHYGPTVNK	WWYHYGPTVNK	QLR-	T20170314-09	56.519	19.7	0.00015
[5]	TDP203																																		484.235	3	7016	-	WWYHYGPTVNK	WWYHYGPTVNK	QLR-	T20170314-12	82.466	20.9	0.00015
[5]	TDP203
[5]	TDP203																																													484.235	3	38597	-
[5]	TDP203
[5]	TDP203																							484.235	3	25325	-	WWYHYGPTVNK	WWYHYGPTVNK	QLR-	T20170314-09	61.936	21.9	0.00015
[5]	TDP203
[5]	TDP203																																		462.739	4	12051	-	WWYHYGPTVNKQLR	WWYHYGPTVNKQLR	-	T20170314-12	73.764	17.2	0.00016
[5]	TDP203
[5]	TDP203																							484.235	3	41295	-	WWYHYGPTVNK	WWYHYGPTVNK	QLR-	T20170314-09	50.686	21.1	0.00016
[5]	TDP203																							484.235	3	13567	-	WWYHYGPTVNK	WWYHYGPTVNK	QLR-	T20170314-09	76.483	18.8	0.00016
[5]	TDP203
[5]	TDP203																																													484.235	3	22780	-
[5]	TDP203																																		484.234	3	6832	-	WWYHYGPTVNK	WWYHYGPTVNK	QLR-	T20170314-12	81.379	18.2	0.00016
[5]	TDP203
[5]	TDP203												462.739	4	45831	-	WWYHYGPTVNKQLR	WWYHYGPTVNKQLR	-	T20170314-07	50.485	18.4	0.00086
[5]	TDP203												462.739	4	45831	-	WWYHYGPTVNKQLR	WWYHYGPTVNKQLR	-	T20170314-07	50.485	18.4	0.00086
[5]	TDP203
[5]	TDP203
[5]	TDP203												621.98	3	16536	-	WWYHYGPTVNKQLR	W(Oxidation)WYHYGPTVNKQLR	-	T20170314-06	43.525	17.4	0.00017
[5]	TDP203
[5]	TDP203																																													604.778	2	31372	-
[5]	TDP203
[5]	TDP203
[5]	TDP203
[5]	TDP203
[5]	TDP203
[5]	TDP203
[5]	TDP203
[5]	TDP203	466.738	4	52828	-	WWYHYGPTVNKQLR	WW(Oxidation)YHYGPTVNKQLR	-	T20170314-05	44.47	22.6	0.00018
[5]	TDP203
[5]	TDP203
[5]	TDP203																																		462.738	4	13290	-	WWYHYGPTVNKQLR	WWYHYGPTVNKQLR	-	T20170314-12	69.834	23	0.00019
[5]	TDP203
[5]	TDP203
[5]	TDP203
[5]	TDP203
[5]	TDP203												621.981	3	9177	-	WWYHYGPTVNKQLR	W(Oxidation)WYHYGPTVNKQLR	-	T20170314-07	47.286	17.6	0.0002
[5]	TDP203
[5]	TDP203
[5]	TDP203
[5]	TDP203																																		484.235	3	12330	-	WWYHYGPTVNK	WWYHYGPTVNK	QLR-	T20170314-12	72.68	20.2	0.0002
[5]	TDP203
[5]	TDP203																							616.648	3	20470	-	WWYHYGPTVNKQLR	WWYHYGPTVNKQLR	-	T20170314-09	46.222	17.1	0.0002
[5]	TDP203																																													484.235	3	35658	-
[5]	TDP203
[5]	TDP203
[5]	TDP203
[5]	TDP203																																		484.235	3	136657	-	WWYHYGPTVNK	WWYHYGPTVNK	QLR-	T20170314-12	46.748	21.1	0.00021
[5]	TDP203
[5]	TDP203
[5]	TDP203																							466.739	4	37917	-	WWYHYGPTVNKQLR	WW(Oxidation)YHYGPTVNKQLR	-	T20170314-09	43.545	23.6	0.00022
[5]	TDP203
[5]	TDP203
[5]	TDP203
[5]	TDP203
[5]	TDP203																							484.235	3	32035	-	WWYHYGPTVNK	WWYHYGPTVNK	QLR-	T20170314-09	46.087	20.7	0.00023
[5]	TDP203																							484.235	3	21900	-	WWYHYGPTVNK	WWYHYGPTVNK	QLR-	T20170314-09	59.931	18.4	0.00023
[5]	TDP203																																													484.235	3	14369	-
[5]	TDP203																																													484.234	3	15614	-
[5]	TDP203
[5]	TDP203
[5]	TDP203																																													484.235	3	12934	-
[5]	TDP203
[5]	TDP203
[5]	TDP203
[5]	TDP203																							484.235	3	26278	-	WWYHYGPTVNK	WWYHYGPTVNK	QLR-	T20170314-09	64.093	19.7	0.00025
[5]	TDP203
[5]	TDP203
[5]	TDP203
[5]	TDP203
[5]	TDP203												462.739	4	185168	-	WWYHYGPTVNKQLR	WWYHYGPTVNKQLR	-	T20170314-07	47.056	21.5	0.00026
[5]	TDP203
[5]	TDP203
[5]	TDP203
[5]	TDP203
[5]	TDP203
[5]	TDP203												462.739	4	52671	-	WWYHYGPTVNKQLR	WWYHYGPTVNKQLR	-	T20170314-07	49.561	21.5	0.00027
[5]	TDP203																							484.235	3	12982	-	WWYHYGPTVNK	WWYHYGPTVNK	QLR-	T20170314-09	72.228	20.1	0.00028
[5]	TDP203
[5]	TDP203
[5]	TDP203																																													484.235	3	346949	-
[5]	TDP203
[5]	TDP203	462.738	4	102083	-	WWYHYGPTVNKQLR	WWYHYGPTVNKQLR	-	T20170314-04	44.886	16.9	0.00028
[5]	TDP203																																													484.235	3	18106	-
[5]	TDP203
[5]	TDP203																							484.233	3	31327	-	WWYHYGPTVNK	WWYHYGPTVNK	QLR-	T20170314-09	60.898	18.5	0.00029
[5]	TDP203												616.648	3	7329	-	WWYHYGPTVNKQLR	WWYHYGPTVNKQLR	-	T20170314-07	50.985	16.1	0.00029
[5]	TDP203																																													484.235	3	79157	-
[5]	TDP203
[5]	TDP203	466.734	4	11106	-	WWYHYGPTVNKQLR	WWYHY(Oxidation)GPTVNKQLR	-	T20170314-05	45.535	23.5	0.00031
[5]	TDP203
[5]	TDP203																																		484.235	3	19133	-	WWYHYGPTVNK	WWYHYGPTVNK	QLR-	T20170314-12	66.942	19.8	0.00031
[5]	TDP203																																													484.235	3	24614	-
[5]	TDP203
[5]	TDP203																							462.739	4	74017	-	WWYHYGPTVNKQLR	WWYHYGPTVNKQLR	-	T20170314-08	45.374	21.1	0.00031
[5]	TDP203
[5]	TDP203
[5]	TDP203																																													484.235	3	19492	-
[5]	TDP203
[5]	TDP203
[5]	TDP203																							462.741	4	182629	-	WWYHYGPTVNKQLR	WWYHYGPTVNKQLR	-	T20170314-08	44.666	19	0.00033
[5]	TDP203
[5]	TDP203
[5]	TDP203
[5]	TDP203	621.981	3	15572	-	WWYHYGPTVNKQLR	W(Oxidation)WYHYGPTVNKQLR	-	T20170314-05	44.481	16	0.00034
[5]	TDP203																							484.236	3	20117	-	WWYHYGPTVNK	WWYHYGPTVNK	QLR-	T20170314-09	67.945	17.4	0.00035
[5]	TDP203	466.737	4	10623	-	WWYHYGPTVNKQLR	WW(Oxidation)YHYGPTVNKQLR	-	T20170314-05	42.107	23	0.00035
[5]	TDP203
[5]	TDP203																																		484.235	3	707925	-	WWYHYGPTVNK	WWYHYGPTVNK	QLR-	T20170314-12	46.053	19.5	0.00035
[5]	TDP203												466.738	4	20111	-	WWYHYGPTVNKQLR	WW(Oxidation)YHYGPTVNKQLR	-	T20170314-06	43.4	19.3	0.00036
[5]	TDP203	616.649	3	29143	-	WWYHYGPTVNKQLR	WWYHYGPTVNKQLR	-	T20170314-05	47.243	15.9	0.00036
[5]	TDP203
[5]	TDP203																							484.235	3	633239	-	WWYHYGPTVNK	WWYHYGPTVNK	QLR-	T20170314-09	46.773	18.6	0.00036
[5]	TDP203	621.98	3	20383	-	WWYHYGPTVNKQLR	W(Oxidation)WYHYGPTVNKQLR	-	T20170314-05	47.285	17.3	0.00036
[5]	TDP203	470.737	4	34045	-	WWYHYGPTVNKQLR	W(Oxidation)W(Oxidation)YHYGPTVNKQLR	-	T20170314-05	43.748	21.2	0.00036
[5]	TDP203
[5]	TDP203																							484.234	3	14136	-	WWYHYGPTVNK	WWYHYGPTVNK	QLR-	T20170314-09	74.693	18.1	0.00037
[5]	TDP203
[5]	TDP203																							462.739	4	191849	-	WWYHYGPTVNKQLR	WWYHYGPTVNKQLR	-	T20170314-09	45.805	19.7	0.00037
[5]	TDP203
[5]	TDP203
[5]	TDP203
[5]	TDP203
[5]	TDP203																																													484.235	3	56455	-
[5]	TDP203												616.649	3	20618	-	WWYHYGPTVNKQLR	WWYHYGPTVNKQLR	-	T20170314-06	45.809	17.6	0.0004
[5]	TDP203
[5]	TDP203																																		484.235	3	10433	-	WWYHYGPTVNK	WWYHYGPTVNK	QLR-	T20170314-12	78.409	16.4	0.0004
[5]	TDP203												462.739	4	70382	-	WWYHYGPTVNKQLR	WWYHYGPTVNKQLR	-	T20170314-06	45.879	20.8	0.00041
[5]	TDP203																																		462.738	4	11653	-	WWYHYGPTVNKQLR	WWYHYGPTVNKQLR	-	T20170314-12	77.263	21.5	0.00041
[5]	TDP203
[5]	TDP203
[5]	TDP203
[5]	TDP203																							621.98	3	9533	-	WWYHYGPTVNKQLR	W(Oxidation)WYHYGPTVNKQLR	-	T20170314-08	43.177	18.3	0.00041
[5]	TDP203																																		462.74	4	112563	-	WWYHYGPTVNKQLR	WWYHYGPTVNKQLR	-	T20170314-12	45.731	20.4	0.00041
[5]	TDP203																							484.236	3	30502	-	WWYHYGPTVNK	WWYHYGPTVNK	QLR-	T20170314-09	49.962	19	0.00041
[5]	TDP203
[5]	TDP203												616.648	3	10523	-	WWYHYGPTVNKQLR	WWYHYGPTVNKQLR	-	T20170314-07	48.333	15.7	0.00041
[5]	TDP203
[5]	TDP203																																													484.235	3	16748	-
[5]	TDP203												462.738	4	38109	-	WWYHYGPTVNKQLR	WWYHYGPTVNKQLR	-	T20170314-07	49.913	19.3	0.00042
[5]	TDP203
[5]	TDP203
[5]	TDP203												462.738	4	17190	-	WWYHYGPTVNKQLR	WWYHYGPTVNKQLR	-	T20170314-06	46.655	21.4	0.00042
[5]	TDP203																																		462.739	4	9254	-	WWYHYGPTVNKQLR	WWYHYGPTVNKQLR	-	T20170314-12	70.707	18.6	0.00043
[5]	TDP203
[5]	TDP203
[5]	TDP203
[5]	TDP203
[5]	TDP203
[5]	TDP203
[5]	TDP203
[5]	TDP203
[5]	TDP203
[5]	TDP203												484.233	3	7814	-	WWYHYGPTVNK	WWYHYGPTVNK	QLR-	T20170314-07	51.769	17.6	0.00046
[5]	TDP203																																		462.739	4	34751	-	WWYHYGPTVNKQLR	WWYHYGPTVNKQLR	-	T20170314-12	47.672	21.4	0.00046
[5]	TDP203
[5]	TDP203																							484.235	3	17078	-	WWYHYGPTVNK	WWYHYGPTVNK	QLR-	T20170314-09	70.451	18.7	0.00047
[5]	TDP203																																													484.235	3	14283	-
[5]	TDP203
[5]	TDP203
[5]	TDP203
[5]	TDP203
[5]	TDP203																							484.235	3	20383	-	WWYHYGPTVNK	WWYHYGPTVNK	QLR-	T20170314-09	67.593	17.2	0.00047
[5]	TDP203																																													484.235	3	15260	-
[5]	TDP203
[5]	TDP203												462.739	4	39654	-	WWYHYGPTVNKQLR	WWYHYGPTVNKQLR	-	T20170314-07	49.173	19.1	0.00049
[5]	TDP203
[5]	TDP203																																		462.738	4	13952	-	WWYHYGPTVNKQLR	WWYHYGPTVNKQLR	-	T20170314-12	75.649	19.3	0.00051
[5]	TDP203												616.647	3	23627	-	WWYHYGPTVNKQLR	WWYHYGPTVNKQLR	-	T20170314-07	47.616	18.2	0.00052
[5]	TDP203												462.739	4	31435	-	WWYHYGPTVNKQLR	WWYHYGPTVNKQLR	-	T20170314-07	51.936	18.2	0.00052
[5]	TDP203																																													484.235	3	117279	-
[5]	TDP203																																													484.235	3	109118	-
[5]	TDP203																							484.235	3	14719	-	WWYHYGPTVNK	WWYHYGPTVNK	QLR-	T20170314-09	72.583	19.9	0.00053
[5]	TDP203
[5]	TDP203																							484.235	3	58209	-	WWYHYGPTVNK	WWYHYGPTVNK	QLR-	T20170314-09	51.054	19.4	0.00053
[5]	TDP203
[5]	TDP203																							484.235	3	21689	-	WWYHYGPTVNK	WWYHYGPTVNK	QLR-	T20170314-09	68.662	17.9	0.00054
[5]	TDP203
[5]	TDP203
[5]	TDP203																																													484.235	3	15687	-
[5]	TDP203																																		462.738	4	16261	-	WWYHYGPTVNKQLR	WWYHYGPTVNKQLR	-	T20170314-12	50.203	19	0.00056
[5]	TDP203																							484.235	3	48888	-	WWYHYGPTVNK	WWYHYGPTVNK	QLR-	T20170314-09	49.23	17	0.00056
[5]	TDP203
[5]	TDP203
[5]	TDP203																							462.739	4	18681	-	WWYHYGPTVNKQLR	WWYHYGPTVNKQLR	-	T20170314-08	46.117	19	0.00056
[5]	TDP203
[5]	TDP203
[5]	TDP203																																													484.236	3	825596	-
[5]	TDP203																																													462.739	4	30175	-
[5]	TDP203																																		484.234	3	17298	-	WWYHYGPTVNK	WWYHYGPTVNK	QLR-	T20170314-12	59.44	16.7	0.00059
[5]	TDP203
[5]	TDP203
[5]	TDP203																							484.235	3	45925	-	WWYHYGPTVNK	WWYHYGPTVNK	QLR-	T20170314-09	55.44	19.3	0.0006
[5]	TDP203																																		661.803	2	37274	-	WWYHYGPTVN	WWYHYGPTVN	KQLR-	T20170314-12	53.007	18.5	0.00061
[5]	TDP203																																													484.235	3	16568	-
[5]	TDP203																																													484.235	3	67590	-
[5]	TDP203
[5]	TDP203
[5]	TDP203																																													484.235	3	185777	-
[5]	TDP203
[5]	TDP203
[5]	TDP203																																		494.899	3	15959	-	WWYHYGPTVNK	W(Oxidation)W(Oxidation)YHYGPTVNK	QLR-	T20170314-12	43.168	18.1	0.00065
[5]	TDP203																																		484.234	3	15637	-	WWYHYGPTVNK	WWYHYGPTVNK	QLR-	T20170314-12	70.105	15.9	0.00065
[5]	TDP203																																													484.235	3	48157	-
[5]	TDP203																																		484.235	3	9671	-	WWYHYGPTVNK	WWYHYGPTVNK	QLR-	T20170314-12	78.849	18.8	0.00067
[5]	TDP203												466.738	4	40552	-	WWYHYGPTVNKQLR	WW(Oxidation)YHYGPTVNKQLR	-	T20170314-07	44.113	21.9	0.00067
[5]	TDP203
[5]	TDP203																							484.232	3	27237	-	WWYHYGPTVNK	WWYHYGPTVNK	QLR-	T20170314-09	52.681	17.9	0.00067
[5]	TDP203																																		484.233	3	11050	-	WWYHYGPTVNK	WWYHYGPTVNK	QLR-	T20170314-12	73.02	15.8	0.00067
[5]	TDP203																																													484.234	3	15574	-
[5]	TDP203
[5]	TDP203
[5]	TDP203
[5]	TDP203																							484.234	3	93220	-	WWYHYGPTVNK	WWYHYGPTVNK	QLR-	T20170314-09	48.192	19.3	0.00072
[5]	TDP203
[5]	TDP203
[5]	TDP203																							484.235	3	10801	-	WWYHYGPTVNK	WWYHYGPTVNK	QLR-	T20170314-09	75.787	18.1	0.00073
[5]	TDP203																																													484.235	3	19094	-
[5]	TDP203
[5]	TDP203																																													484.235	3	10928	-
[5]	TDP203																																		484.235	3	16172	-	WWYHYGPTVNK	WWYHYGPTVNK	QLR-	T20170314-12	68.391	17.3	0.00075
[5]	TDP203																							484.235	3	9470	-	WWYHYGPTVNK	WWYHYGPTVNK	QLR-	T20170314-09	82.965	19.1	0.00076
[5]	TDP203
[5]	TDP203
[5]	TDP203
[5]	TDP203
[5]	TDP203
[5]	TDP203																							484.236	3	14900000	-	WWYHYGPTVNK	WWYHYGPTVNK	QLR-	T20170314-09	46.421	19.2	0.00077
[5]	TDP203
[5]	TDP203
[5]	TDP203																																													661.802	2	22142	-
[5]	TDP203
[5]	TDP203
[5]	TDP203																																													484.233	3	22758	-
[5]	TDP203
[5]	TDP203																																		484.235	3	8955	-	WWYHYGPTVNK	WWYHYGPTVNK	QLR-	T20170314-12	81.732	17.5	0.0008
[5]	TDP203																																													422.212	3	50960	=-W
[5]	TDP203																																		462.739	4	68774	-	WWYHYGPTVNKQLR	WWYHYGPTVNKQLR	-	T20170314-12	46.455	18.2	0.00081
[5]	TDP203
[5]	TDP203																							484.235	3	5417	-	WWYHYGPTVNK	WWYHYGPTVNK	QLR-	T20170314-09	85.166	16.1	0.00082
[5]	TDP203												484.234	3	29460	-	WWYHYGPTVNK	WWYHYGPTVNK	QLR-	T20170314-07	46.301	16.8	0.00082
[5]	TDP203												484.235	3	131956	-	WWYHYGPTVNK	WWYHYGPTVNK	QLR-	T20170314-07	47.017	18.1	0.00083
[5]	TDP203																							484.235	3	11540	-	WWYHYGPTVNK	WWYHYGPTVNK	QLR-	T20170314-09	77.175	17.9	0.00083
[5]	TDP203
[5]	TDP203																																													462.738	4	28996	-
[5]	TDP203
[5]	TDP203
[5]	TDP203
[5]	TDP203																																													462.739	4	31120	-
[5]	TDP203	462.738	4	21591	-	WWYHYGPTVNKQLR	WWYHYGPTVNKQLR	-	T20170314-04	46.331	20.9	0.00089
[5]	TDP203																							484.235	3	20265	-	WWYHYGPTVNK	WWYHYGPTVNK	QLR-	T20170314-09	66.102	17.7	0.00089
[5]	TDP203
[5]	TDP203																																		484.235	3	34721	-	WWYHYGPTVNK	WWYHYGPTVNK	QLR-	T20170314-12	50.473	17.9	0.00092
[5]	TDP203
[5]	TDP203
[5]	TDP203
[5]	TDP203	462.739	4	50182	-	WWYHYGPTVNKQLR	WWYHYGPTVNKQLR	-	T20170314-05	50.864	17.3	0.00093
[5]	TDP203																							484.234	3	35914	-	WWYHYGPTVNK	WWYHYGPTVNK	QLR-	T20170314-09	55.065	18.3	0.00094
[5]	TDP203
[5]	TDP203
[5]	TDP203																																													484.234	3	35111	-
[5]	TDP203																																		462.738	4	12598	-	WWYHYGPTVNKQLR	WWYHYGPTVNKQLR	-	T20170314-12	71.898	17.5	0.001
[5]	TDP203																							484.235	3	12044	-	WWYHYGPTVNK	WWYHYGPTVNK	QLR-	T20170314-09	70.089	17.4	0.001
[5]	TDP203
[5]	TDP203	466.737	4	17654	-	WWYHYGPTVNKQLR	WW(Oxidation)YHYGPTVNKQLR	-	T20170314-04	43.045	18.8	0.001
[5]	TDP203																																													484.234	3	18040	-
[5]	TDP203												462.738	4	24313	-	WWYHYGPTVNKQLR	WWYHYGPTVNKQLR	-	T20170314-06	46.229	18.4	0.001
[5]	TDP203																							466.737	4	18395	-	WWYHYGPTVNKQLR	WWYHY(Oxidation)GPTVNKQLR	-	T20170314-08	44.407	20.3	0.001
[5]	TDP203
[5]	TDP203																							484.235	3	39148	-	WWYHYGPTVNK	WWYHYGPTVNK	QLR-	T20170314-09	56.151	18.2	0.0011
[5]	TDP203
[5]	TDP203																							484.235	3	35801	-	WWYHYGPTVNK	WWYHYGPTVNK	QLR-	T20170314-09	58.862	17.7	0.0011
[5]	TDP203
[5]	TDP203																																		484.235	3	11213	-	WWYHYGPTVNK	WWYHYGPTVNK	QLR-	T20170314-12	77.302	17.3	0.0011
[5]	TDP203												466.737	4	10466	-	WWYHYGPTVNKQLR	WWYHY(Oxidation)GPTVNKQLR	-	T20170314-07	42.815	21.5	0.0011
[5]	TDP203												466.737	4	13492	-	WWYHYGPTVNKQLR	WW(Oxidation)YHYGPTVNKQLR	-	T20170314-06	44.851	18.4	0.0011
[5]	TDP203
[5]	TDP203
[5]	TDP203	462.738	4	25408	-	WWYHYGPTVNKQLR	WWYHYGPTVNKQLR	-	T20170314-04	45.992	19	0.0011
[5]	TDP203																																		484.235	3	14084	-	WWYHYGPTVNK	WWYHYGPTVNK	QLR-	T20170314-12	72.299	18.6	0.0011
[5]	TDP203
[5]	TDP203
[5]	TDP203
[5]	TDP203
[5]	TDP203
[5]	TDP203
[5]	TDP203																																													484.237	3	377241	-
[5]	TDP203
[5]	TDP203																							484.234	3	9841	-	WWYHYGPTVNK	WWYHYGPTVNK	QLR-	T20170314-09	77.542	16.2	0.0012
[5]	TDP203																																		462.739	4	12848	-	WWYHYGPTVNKQLR	WWYHYGPTVNKQLR	-	T20170314-12	71.54	18.6	0.0012
[5]	TDP203
[5]	TDP203
[5]	TDP203
[5]	TDP203																																													484.235	3	15051	-
[5]	TDP203	621.982	3	6895	-	WWYHYGPTVNKQLR	WWY(Oxidation)HYGPTVNKQLR	-	T20170314-05	44.821	15.9	0.0012
[5]	TDP203
[5]	TDP203	466.738	4	10371	-	WWYHYGPTVNKQLR	WW(Oxidation)YHYGPTVNKQLR	-	T20170314-05	43.349	20.1	0.0013
[5]	TDP203																																													484.235	3	54494	-
[5]	TDP203
[5]	TDP203
[5]	TDP203												466.737	4	33417	-	WWYHYGPTVNKQLR	WW(Oxidation)YHYGPTVNKQLR	-	T20170314-06	43.79	19.5	0.0013
[5]	TDP203												462.739	4	48638	-	WWYHYGPTVNKQLR	WWYHYGPTVNKQLR	-	T20170314-07	51.207	18.5	0.0013
[5]	TDP203																																													484.235	3	25989	-
[5]	TDP203																																													484.235	3	15514	-
[5]	TDP203
[5]	TDP203
[5]	TDP203
[5]	TDP203																																		462.739	4	13559	-	WWYHYGPTVNKQLR	WWYHYGPTVNKQLR	-	T20170314-12	74.882	19.3	0.0014
[5]	TDP203																																													484.235	3	23280	-
[truncated: 45,528 more rows]
[truncated: 87 more columns]
